# Supplementary material
Source: PubMed Central journal article supplement (PMC6745274)

# Targeted Treatment of Individuals with Psychosis Carrying a Copy Number Variant Containing a Genomic Triplication of the Glycine Decarboxylase Gene

## Supplemental Information

### Contents

|                                                                                                                                     |     |
|-------------------------------------------------------------------------------------------------------------------------------------|-----|
| Personalized Medicine Based on Genetically Informed Targeted Treatments in Psychiatry ....                                          | 3   |
| 9p24.1 CNV Details.....                                                                                                             | 5   |
| Genes in the 9p24.1 Complex Genomic Rearrangement Region that Act in the Brain.....                                                 | 6   |
| Glycine Augmentation Trials .....                                                                                                   | 9   |
| Plasma Levels .....                                                                                                                 | 13  |
| Dose Preparation of Glycine and Placebo/ Average Dose per Arm .....                                                                 | 24  |
| Neurocognition .....                                                                                                                | 29  |
| Associations between 9p24.1 Region and Neuropsychiatric Disorders .....                                                             | 30  |
| References .....                                                                                                                    | 33  |
| Tables.....                                                                                                                         | 38  |
| Table S1: Double-Blind Exposure to Glycine – Subject 5459: Actual Titration .....                                                   | 38  |
| Table S2: Double-Blind Exposure to Placebo - Subject 5459: Actual Titration .....                                                   | 40  |
| Table S3: Open-Label Exposure to Glycine – Subject 5459: Actual Titration .....                                                     | 42  |
| Table S4: Double-Blind Exposure to Placebo - Subject 3363: Actual Titration .....                                                   | 44  |
| Table S5: Double-Blind Exposure to Glycine - Subject 3363: Actual Titration .....                                                   | 46  |
| Table S6: Open-Label Exposure to Glycine - Subject 3363: Actual Titration.....                                                      | 49  |
| Table S7. Open-Label Exposure to Chronic Glycine - Subject 3363: Actual Titration .....                                             | 51  |
| Table S8. Open-Label Exposure to Chronic Glycine - Subject 5459: Actual Titration .....                                             | 66  |
| Table S1A. Double-Blind Exposure to Glycine - Subject 5459: Planned Titration .....                                                 | 81  |
| Table S2A. Double-Blind Exposure to Placebo - Subject 5459: Planned Titration .....                                                 | 83  |
| Table S3A. Open-Label Exposure to Glycine - Subject 5459: Planned Titration .....                                                   | 84  |
| Table S4A. Double-Blind Exposure to Placebo - Subject 3363: Planned Titration .....                                                 | 85  |
| Table S5A. Double-Blind Exposure to Glycine - Subject 3363: Planned Titration .....                                                 | 86  |
| Table S6A. Open-Label Exposure to Glycine - Subject 3363: Planned Titration .....                                                   | 87  |
| Table S7A. Open-Label Exposure to Chronic Glycine - Subject 3363: Planned Titration .....                                           | 88  |
| Table S8A. Open-Label Exposure to Chronic Glycine - Subject 5459: Planned Titration .....                                           | 93  |
| Figures .....                                                                                                                       | 98  |
| Figure S1: Comparative Genome Hybridization Array (aCGH) Analysis .....                                                             | 98  |
| Figure S2. Changes in Positive and Negative Syndrome Scale (PANSS) Domains as a Function of Treatment with Glycine or Placebo. .... | 99  |
| Figure S3: Changes in Mania and Depressive Symptoms as a Function of Treatment with Glycine or Placebo in Subject 5459 .....        | 100 |
| Figure S4: Changes in Plasma Kynurenine (KYN) Level as a Function of Treatment with Glycine or Placebo or DCS or Placebo. ....      | 101 |

|                                                                                                                                            |     |
|--------------------------------------------------------------------------------------------------------------------------------------------|-----|
| Figure S5: Changes in Plasma Kynurenic Acid (KYNA) Level as a Function of Treatment with Glycine or Placebo or DCS or Placebo.....         | 102 |
| Figure S6: Changes in Plasma Glycine Level as a Function of Treatment with DCS or Placebo.....                                             | 103 |
| Figure S7: Changes in MATRICS Cognitive Domains and Overall Composite Score as a Function of Glycine, DCS and Placebo.....                 | 104 |
| Figure S8. Schematic Illustrating Possible Mechanism of Action of Glycine and DCS Augmentation.....                                        | 105 |
| Figure S9: GLDC SNP Dosage.....                                                                                                            | 106 |
| Figure S10: Intronic Duplication in <i>PTPRD</i> .....                                                                                     | 108 |
| Figure S11: Changes in Severity of Illness (Clinical Global Impression Scale, CGI) as a Function of Treatment with Glycine or Placebo..... | 109 |
| Figure S12. Glycine/Placebo Supplies.....                                                                                                  | 110 |
| Figure S13. Changes in Positive and Negative Syndrome Scale (PANSS) Domains as a Function of Treatment with DCS or Placebo.....            | 111 |
| Figure S14: Changes in Mania and Depressive Symptoms as a Function of Treatment with DCS or Placebo in Subject 5459.....                   | 112 |
| Figure S15: Changes in Severity of Illness (CGI) as a Function of Treatment with DCS or Placebo.....                                       | 113 |
| Figure S16: Sequencing of a Schizophrenia Patient from the Rujescu Cohort.....                                                             | 114 |
| Figure S17: Sequencing of Autism Genetic Research Exchange Family AU2372.....                                                              | 115 |

## **Personalized Medicine Based on Genetically Informed Targeted Treatments in Psychiatry, Including Challenges and Broader Implications**

Genetic discoveries and clinical genomics (1) have revolutionized the molecular diagnosis and treatment of many medical disorders, giving credence to the idea that precision medicine can both optimize treatment responses and minimize adverse effects. (2-4) And, for psychiatry, in particular, as Scolnick has written, “A key milestone ...for the entire field - is to link a particular genetic variant ...to the disease biology.” (5) Yet the abundance of recent, replicable findings in psychiatric genetic association studies contrasts with the striking absence of discoveries that have translated into improved clinical care, (6) the one exception being identification of the susceptibility allele for Stevens-Johnson syndrome. Screening prospective recipients of carbamazepine has virtually eliminated this potentially fatal side effect in parts of Southeast Asia. (4, 7)

As the present study illustrates, use of structural genetic variants is a promising approach. However, as also illustrated by the present study, convincing demonstration of treatment relevance of these variants in human studies is difficult to achieve, because even the most recurrent structural variants are individually rare, private mutations even more so. As a result, most studies will be variations of “n-of-1” treatment trials. (8, 9) Sample sizes will invariably be small and will usually be limited to one or a few families, a practical constraint on the feasibility of replications based on conventional sample size considerations. Nevertheless, rare variants, which have comparatively large effects, are more likely to be tractable if their mechanisms of action can be identified. If individuals with mutations in genes impacting glutamatergic and NMDAR signaling represent a molecular subtype, therapeutic benefit from compounds that enhance NMDAR function may not be limited to the *GLDC* mutation specifically, resulting in potentially larger sample sizes.

Even if the challenge of demonstrating efficacy for a given treatment based on a given structural genetic variant is overcome, the translation of this knowledge into clinical applications poses additional challenges. The development of medications to treat psychiatric disorders (so-called “tertiary prevention”) based on improved knowledge of pathophysiology is an obvious and not particularly controversial step. However, considering treatment of those with prodromal symptoms of disorder (“secondary prevention”) and even asymptomatic individuals at risk (“primary prevention”) raises important public health and ethical issues, a discussion of which is beyond the scope of this paper.

## 9p24.1 CNV Details

The complex rearrangement is located on a marker chromosome (10) and is made up of CNVs ranging in size from 400 bp to 1.15 Mb, with the most likely phenotype-related gene disruptions occurring in the first four CNVs (Figure 1A). The rearrangement was likely formed in the germline of the maternal grandmother. (11) The marker was not present in the proband's two siblings or in the mother's three siblings. Custom high-resolution array comparative genomic hybridization showed that the first set of CNVs spans (hg 19) chr9:5,273,771-7,129,163 and includes a 24 kb triplicated region (*RLN2*), a 1.15 Mb duplicated region (*RLN1*, *PLGRKT*, *CD274*, *PDCD1LG2*, *RIC1*, *ERMP1*, *MLANA*, *KIAA2026*, *RANBP6*, *IL33*, *TP52L3*, and *UHRF2* (partial)) and a 672 kb triplication comprised of *UHRF2* (partial), *GLDC*, and *KDM4C* (partial). Within this region, the glycine decarboxylase gene (*GLDC*), which encodes the GLDC enzyme, is fully triplicated. Genotypes of SNP rs10975641 of the *GLDC* gene, which is associated with selective serotonin reuptake inhibitor response, (12) were consistent with the *GLDC* triplication in the carriers (Figure S9). A smaller 64 kb intronic duplication [chr 9:9, 862,702-9,921,214 (minimum)/9,927,237 (maximum)] less than 2 kb from the nearest exon, contained part of the *PTPRD* gene (Figure S10).

## Genes in the 9p24.1 Complex Genomic Rearrangement Region that Act in the Brain

*RANBP6*: The GTPase Ran regulates nucleocytoplasmic transport. Ran binding proteins (RanBP) regulate the guanine-nucleotide state of Ran, which regulates importin-dependent cytoplasmic transport). (13) Importins are involved in regulating pathways connecting synaptic NMDA receptor signals to nuclear responses. (14) *RANBP6* is particularly noteworthy for being among the 8.5% of genes most intolerant of functional variation genome-wide (intolerance score: -1) (15) (<http://genic-intolerance.org/>); Residual Variation Intolerance Score (RVIS) based on ExAC sequencing data (16) 11.3% of genes most intolerant of functional variation. Intolerance score based on z-score distribution (16): 88 percentile (lower percentile corresponds with more *intolerant*).

*KDM4C*: Increased gene transcription resulting from overexpression of the *KDM4C* gene which encodes a histone trimethyl demethylase. The *KDM4C* gene is a histone trimethyl demethylase; ectopic expression leads to decreased histone methylation at the H3K9me3/me2 residues and a reduction of heterochromatin. (17) Overexpression of *KDM4C* may result in increased transcription and epigenetic changes in gene expression. Increased expression of Setdb1, a histone methyltransferase involved in transcriptional repression, was recently shown to be involved in the regulation of mood-related behaviors at loci that include the NMDAR subunit *NR2B/Grin2B*. (18) Notably, histone methylation has been implicated in schizophrenia (19) and a recent genome-wide association analysis found that histone methylation processes showed the strongest association with schizophrenia, major depression and bipolar disorder. (20) If overexpression of the *KDM4C* contributes to features of a neurodevelopmental phenotype, it could potentially be treated with *KDM4C* inhibitors. Intolerance score: -0.34; percentile: 29.6 (RVIS: 6.94 percentile based on ExAC sequencing data). Intolerance score based on Lek *et al.* (16) z-score distribution: 96 percentile.

*UHRF2*: *UHRF2*, an E3 ubiquitin ligase and a small ubiquitin-like modifier (SUMO) E3 ligase is a transcriptional target of the transcription factor E2F1 and is an important mediator of the apoptotic action of E2F1. (21) Thus, increased expression of *UHRF2* may promote apoptosis. Increased expression of apoptotic genes has been found in bipolar disorder but not in schizophrenia. (22) In addition, the association of GSK3 $\beta$  with E2F1 facilitates nerve growth factor-induced neuronal cell differentiation. (23) The GSK3 $\beta$  signaling pathway is a potential target of lithium (24, 25) and has been implicated in the development of neuropsychiatric disorders. (26, 27) Deletion is associated with decreased spatial memory mediated in the hippocampus. (28) Intolerance score: -0.38; percentile: 27.9 (RVIS: 7.39 percentile based on ExAC sequencing data). Intolerance score based on Lek *et al.* (16) z-score distribution: 5.5 percentile.

*IL33*: *IL33* is a member of the IL1-cytokine family and can form a complex with the transcription factor NF $\kappa$ B reducing binding of NF $\kappa$ B to its cognate DNA which results in a reduction NF $\kappa$ B-stimulated gene expression. (29) Astrocyte-derived *IL33* was recently shown to be necessary for normal synapse number and neural circuit function in the spinal cord and thalamus. Deletion of *IL33* was associated with excess excitatory synapses, implicating deficient pruning, and a hyperexcitable intrathalamic circuit. (30) Intolerance score: 0.42; percentile: 77 (RVIS: 40.9 percentile based on ExAC sequencing data). Intolerance score based on Lek *et al.* (16) z-score distribution: 96.6 percentile.

*GLDC*: See text. Intolerance score: -0.67; percentile: 15.41 (RVIS: 29.71 percentile based on ExAC sequencing data). Intolerance score based on Lek *et al.* (16) z-score distribution: 95 percentile.

### Intolerance and Percentile Scores of Other Genes within the Duplicated-Triplicated Region

| Gene                    | Intolerance |            | ExAC RVIS   | ExAC       |
|-------------------------|-------------|------------|-------------|------------|
|                         | Score       | Percentile | percentile* | percentile |
| <i>RLN2</i>             | 0.35        | 74.4       | 89.4        | 76.1       |
| <i>RLN1</i>             | -0.09       | 46.7       | 77.9        | 76.8       |
| <i>CD274</i>            | 0.37        | 75.1       | 38.6        | 35.8       |
| <i>PDCD1LG2</i>         | 0.37        | 75.3       | 72.24       | 88.2       |
| <i>MLANA</i>            | -0.23       | 36.9       | 66.4        | 56.9       |
| <i>KIAA1432</i>         | -1.7        | 2.6        | 1.5         | 88.6       |
| <i>ERMP1</i>            | -1.04       | 7.8        | 7.5         | 87.2       |
| <i>TPD52L3</i>          | 0.48        | 79.3       | 69.9        | 93.7       |
| <i>C9orf46 (PLGRKT)</i> | 0.22        | 67.9       | 54          | 95.6       |

Intolerance scores not available for *KIAA2026*

\* Exome Aggregation Consortium (ExAC), Cambridge, MA (URL: <http://exac.broadinstitute.org>)

[August, 2016].



## Glycine Augmentation Trials

*Subject Information.* At the beginning of the acute glycine augmentation trial, the two participants included one female, age 59 (5459) with a diagnosis of bipolar disorder with psychotic features, and one male, age 31 (3363) with a diagnosis of schizo-affective disorder. By the end of the chronic glycine arm of the study, 5459 was 61 years old and subject 3363 was 33 years old. DSM-IV (31) diagnoses were based on a Structured Clinical Interview for DSM-IV interview, (32) which was supplemented by hospital records and family informant information. A group of four senior clinicians reviewed all clinical material and assigned consensus diagnoses blind to genotype status.

*Medication Information.* During all three arms of the acute glycine trial, medications were kept stable: 3363 - clozaril (100 mg/d), aripiprazole (15 mg/d), celexa (40 mg/d); 5459 - clozaril (50 mg/d), lithium (450 mg/d), gabapentin (300 mg/d), cymbalta (120 mg/d). Within 9 weeks of the end of the acute glycine trial, subject 5459's dose of clozaril was increased from 50 mg/d to 62.5 mg/d due to worsened psychotic symptoms; the dose remained between 62.5-75 mg/d until week 15 of the chronic glycine study when it was lowered to 50 mg/d. The same subject took mirapex (0.03125-0.375 mg/d) for restless legs as of week 4, day 5 for the duration of the chronic glycine study. In all other respects, psychotropic drugs and doses were the same during the chronic trial as during the acute trial.

*Additional Clinical Effects.* Short-term Glycine Trial. Subject 3363 showed improvement in both positive psychotic and negative symptoms. Improvement in subject 5459, who had no negative symptoms, was restricted to positive and mood symptoms. For both subjects, CGI ratings changed from a baseline rating of moderately ill to borderline or mildly ill during glycine administration; placebo ratings were the same as at baseline (Figure S11).

*Management of Side Effects.* Both subjects developed GI side effects during one arm of the double-blind crossover and during treatment with open-label glycine; no GI side effects were experienced during the placebo arm. Both subjects also developed GI side effects during the chronic glycine trial. When these side effects occurred, the next dose or two were held and the subject was re-started on a well-tolerated lower dose, usually within a day (see Tables S1-6 for more details).

### *Tolerability of Glycine*

#### Acute Clinical Trial

Since every dose of glycine and placebo had to be made by hand by the pharmacy due to the blind, target doses (0.8 gm/kg) for each treatment arm during the acute clinical trial were based on the subject's weight approximately five weeks prior to the beginning of a treatment arm. Due to minor weight fluctuations and glycine tolerability during these two acute exposures to glycine, the *de facto* target and sustainably tolerable doses varied (see table below). The maximum sustainably tolerable dose was about 76.2-85% of the optimal dose recommended in the literature. During the chronic glycine trial, the GI side effects became a rate-limiting factor and the maximum sustainably tolerable doses were substantially lower (18.8-27.5%) than the optimal dose recommended in the literature.

#### Chronic Glycine Trial

*Dose Titration.* Starting with a dose of 5.4 gm (1.8 gm TID), the dose was titrated upward toward the planned target doses of 26 gm TID (78 gm/d) for 5459 and 28.8 gm TID (86.5 gm/d) for 3363. Neither subject was able to reach the target dose without developing GI symptoms (Tables S7, S7a, S8, S8a) necessitating dose adjustments. Subject 3363 was able to reach 18 gm TID (0.5 gm/kg) - and subject 5459 was able to reach 18-21 gm TID (0.56-0.67

gm/kg) during the first 16 weeks of the chronic trial but with varying degrees of tolerability of TID dosing. As a result, each began to skip at least one dose/day on a semi-regular basis. After 16 weeks, they requested a respite from the glycine regimen.

Subjects 3363 and 5459 reached doses of 54 gm/d (0.5 gm/kg) and 54-63 gm/d (0.56-0.67 gm/kg), respectively, during the first 16 weeks. Due to the re-emergence of symptoms after glycine discontinuation at 16 weeks, 5459 requested to re-start glycine after 18 days off it and the titration schedule was re-initiated. The highest dose that could be sustained without side effects was 39 gm/d (0.387 gm/kg) for 7 weeks, after which GI side effects required even lower doses for the remainder of the study (Table S8). After 63 days off glycine, 3363 also requested to resume; the highest tolerable dose for any sustained period of time was ~25 gm/d (0.216 gm/kg) (Table S7). Although the target doses had been 26 gm TID (78 gm/d) for 5459 and 28.8 gm TID (86.5 gm/d) for 3363, neither subject was able to reach the target dose without developing GI symptoms, necessitating dose adjustments. Overall, the maximum tolerable doses were 18.8-27.5% of the target dose (see table below).

|                                                       | <b>3363</b>     | <b>5459</b>     |
|-------------------------------------------------------|-----------------|-----------------|
| Target dose – double-blind glycine                    | 0.78 gm/kg      | 0.84 gm/kg      |
| <i>De facto</i> tolerable dose – double-blind glycine | 0.64-0.70 gm/kg | 0.70-0.84 gm/kg |
| Target dose – open-label glycine                      | 0.75 gm/kg      | 0.78 gm/kg      |
| <i>De facto</i> tolerable dose – open-label glycine   | 0.61 gm/kg      | 0.68 gm/kg      |
| Target dose – chronic glycine                         | 0.60 gm/kg      | 0.66-0.68 gm/kg |
| <i>De facto</i> tolerable dose – chronic glycine      | 0.22-0.50 gm/kg | 0.15-0.38 gm/kg |

*Acute Clinical Trial Notes*

As shown in Table S5, family expressed concern about a possible exacerbation of psychotic symptoms in subject 3363 on day 5 of week 3 of glycine augmentation. To be cautious, we held one dose and reduced the next dose, and then slowly titrated the dose of glycine back up over the next several days. The subject denied an exacerbation of symptoms, but reported that he was suddenly experiencing very few intrusive thoughts, including fewer thoughts of any kind, which he found disconcerting. He experienced a notable reduction in positive symptoms shortly afterward.

## Plasma Levels

### Glycine Augmentation Trial

Three baseline plasma levels were obtained for small (excitatory) amino acids and two baseline plasma levels were obtained for large (branch-chain) plasma amino acids, kynurenine (KYN), kynurenic acid (KYNA), quinolinic acid, homocysteine, and GABA. Tryptophan, KYN, KYNA, and quinolinic acid plasma levels were assessed because the kynurenine pathway of tryptophan degradation impacts NMDAR function (33). Homocysteine (Hcy) plasma levels were obtained because Hcy is an agonist of the NMDAR, but acts as a partial antagonist when glycine concentrations at the GMS are low. (34) Total serine levels were obtained as part of a small (excitatory) amino acid assay; in addition, in a separate assay, D-serine and L-serine were measured separately and total serine was calculated as the sum of D-serine (1-4% of total serine) and L-serine (96-99% of total serine). The two methods of calculating total serine were highly correlated ( $r = 0.965-0.9925$ ,  $P < 0.001$ ) and are essentially interchangeable. The table below summarizes the % increases in glycine, total serine (D+L-serine), D-serine, and L-serine levels. Glycine and L-serine plasma levels are shown in Figures 3A-3D.

During the acute clinical trial, plasma levels were repeated in week 6 of each treatment arm and in the final week of the 2-3 week period between treatment arms. During the chronic glycine clinical trial, plasma levels were obtained at baseline, at monthly intervals, and two weeks after the end of the trial. Psychotropic drug plasma levels were obtained at the same time points.

Percent change in total serine and glycine levels during treatment with glycine was calculated using the mean of the baseline values.

**Percent Increases in Plasma Glycine, Total Serine, L-Serine- and D-Serine during Double-Blind (DB) and Open-Label (OL) Exposure to Glycine Augmentation**

|                   | % Increase in Plasma Level |        |          |          |
|-------------------|----------------------------|--------|----------|----------|
|                   | Glycine                    | Serine | L-Serine | D-Serine |
| DB Glycine - 3363 | 166%                       | 170%   | 171%     | 118%     |
| DB Glycine -5459  | 122%                       | 145%   | 146%     | 105%     |
| OL Glycine -3363  | 121%                       | 156%   | 159%     | 47%      |
| OL Glycine -5459  | 179%                       | 205%   | 210%     | 95%      |

Other than the changes noted in the text, no changes outside the normal range were observed in other small amino acid levels or in any of the large branch-chain amino acid plasma levels at baseline or in the various drug conditions. Plasma tryptophan, GABA and glutamine plasma levels were within the normal range, although at the low end of it, throughout the study. Glutamic acid and homocysteine plasma levels were also within the normal range. Quinolinic acid plasma levels were within the normal range in both subjects, but at the high end of that range in 5459 and did not vary as a function of exposure to glycine.

**DCS Augmentation Trial**

Total serine as measured in the small amino acid assay is reported. Notably, DCS plasma levels during the first open-label exposure were well below the ~5.5ug/mL (54uMol/L) reported by Goff *et al.* in a patient who dropped out of a DCS augmentation trial due to worsening clinical symptoms. (35)

Quinolinic acid plasma levels were within the normal range in 3363, but were elevated at baseline in 5459 and normalized on DCS but this reduction was not sustained during chronic exposure to DCS. Hcy plasma levels were within normal range throughout the study.

### Both Augmentation Trials

Psychotropic drug plasma levels were within the therapeutic range at all time points. Lithium level remained stable at 0.4-0.5 mEq/L throughout the study.

### *Methods*

#### Small Excitatory Amino Acids

Plasma glutamic acid, serine, glycine and glutamine were determined using a modified liquid chromatographic procedure (36) that used O-methylserine as the internal standard. Plasma (0.25mL) was deproteinized and extracted prior to derivatization with PITC reagent to enhance separation and detection at 254 nm. Calibration standards that include the expected concentration range preceded each batch of samples as well as a set of quality controls to validate each day's analyses. Based on previous data, inter-assay variability for glutamic acid, serine, glycine and glutamine did not exceed 8.4%, 2.8%, 4.0%, and 10.5%, respectively, for the low quality controls, and 5.4%, 2.8%, 8.0%, and 9.9%, respectively, for the high quality controls (n = 6 days). Intra-assay variability for the same amino acids did not exceed 7.3%, 1.4%, 1.2% and 2.1%, respectively, for the low quality controls, and 6.2%, 5.4%, 3.0% and 5.1%, respectively, for the high quality controls (n = 12).

### Large Neutral Amino Acids

Plasma large neutral amino acids were measured using a gradient liquid chromatographic procedure (36) with norleucine as the internal standard. Plasma (0.25mL) was deproteinized and extracted prior to derivatization with PITC reagent to enhance separation and detection at 254 nm. Calibration standards that include the expected concentration range preceded each batch of samples as well as a set of quality controls to validate each day's analyses. Inter-assay variability for all the amino acids measured did not exceed 14% (n = 25 days).

### Plasma *d*-serine

Plasma *d*-serine was determined using liquid chromatography with fluorescence detection. The procedure was based on the formation of a fluorescent diastereomeric derivative formed from the pre-column addition of *o*-phthalaldehyde and BOC-*L*-Cys. (37) To 100  $\mu$ l of plasma or serum sample, the internal standard (*L*-homocysteic acid) was added, with acetonitrile, vortexed and centrifuged. Following evaporation of the supernatant, the residue was re-dissolved in borate buffer and allowed to react with the derivatizing reagent. Immediately following the reaction, the mixture was injected onto a C-18 column (Nova-Pak, Waters Corp.) and eluted using a complex gradient elution program consisting of an acetate buffer and acetonitrile. The separated components were detected using an Agilent Model 1321A Fluorescence Detector set at  $\lambda_{\text{excit.}} = 245\text{nm}$  and  $\lambda_{\text{emiss.}} = 470\text{nm}$ . The resulting retention times for the internal standard and *d*-serine were 18.8 min., and 24.8 min., respectively. The total run time between samples was about 70 minutes, including equilibration time and on-line derivatization. Intra-assay variability did not exceed 6.4% for the 7 calibration concentrations of *d*-serine (n = 8 for each concentration). Inter-assay variation did not exceed 9.1% based on 2 sets of quality controls included with each run (n = 13 days)



### Plasma Tryptophan

Total plasma tryptophan was measured using a validated unpublished liquid chromatographic procedure that used native fluorescence of tryptophan for detection. An internal standard 5-methyltryptophan was added to the plasma sample (0.25 mL) followed by deproteinization and centrifugation. An aliquot of the supernatant was injected on the column. Using a phosphate buffer (pH = 4.7) and acetonitrile as the mobile phase with a reversed phase ODS column (15 x .39 cm, 4  $\mu$ m Novapak, Waters Corp.), tryptophan and the internal standard were eluted in less than 12 minutes. Fluorescence detection was optimized using an excitation wavelength at 290 nm and analyzed at 340 nm. Inter-assay variability of plasma tryptophan did not exceed 5.1% for the low quality controls, and 7.2% for the high quality controls (n = 22 days).

### Plasma GABA

An HP Chemstation data system was used to control an HP 5988B GC-MS system and to collect and quantify the data. The GC-MS with a DB-1 column (15 m x 0.25 mm I.D., 0.25  $\mu$ m) was operated in the NCI mode using methane: ammonia (95:5) as the reagent gas. The column was programmed from 80°C (holding for 1 min) to 160°C at an increasing rate of 22°C/min and then to 260°C at a rate of 30°C/min. The ion-source temperature was 150°C, and the temperatures of the injector (splitless) and the interface between the chromatograph and the spectrometer were set to 265°C. The extraction method was modified from a previous publication. (38) An internal standard GABA-d<sub>6</sub> (15 ng) was added to 0.5 ml of plasma sample followed by addition of 0.8 ml of 1 M phosphate buffer (pH 11.5) and 50  $\mu$ l of methyl chloroformate. After shaking for 10 min, 150  $\mu$ l of 6 N HCl and 4 ml of ethyl acetate were added. The mixture was mixed for 10 min and centrifuged. The supernatant was transferred to a round

bottom tube and dried down. To the residue, 10  $\mu$ l of triethylamine and 100  $\mu$ l of 15% pentafluorobenzylbromide in acetonitrile were added. The mixture was allowed to stand at room temperature for 30 min and was extracted with 200  $\mu$ l of 0.5 N HCl and 1 ml of hexane. The supernatant was transferred and dried down. The residue was dissolved in 30  $\mu$ l ethyl acetate and 2  $\mu$ l injected for GC-MS analysis. The molecular ion peaks,  $[M]^+$  at  $m/z$  160 from GABA and at  $m/z$  166 from deuterated GABA were used for quantitation, and the fragment peaks at  $m/z$  128 and at  $m/z$  134 were used as confirming ions, respectively. The calibration standard with range of 0.5 to 60 ng/ml of GABA and quality controls were run with each day's analysis. The inter-assay precision of the method was determined by testing the blank plasma containing 6.25, 12.5 and 25.0 ng/ml GABA on six separate days. The relative standard deviations (RSD) were 6.3%, 5.2% and 5.7%, respectively.

#### Plasma Citalopram and Metabolites

Plasma citalopram and two metabolites, desmethyl- and didesmethylcitalopram, were measured using a previously published liquid chromatographic method. (39) The procedure was modified slightly by using a more polar reversed-phase column (trimethylsilyl bonded silica) and altering the mobile phase to 72:28 phosphate buffer:acetonitrile with the pH adjusted to 3.2 with phosphoric acid and n-butylamine with a flow rate at 1.5 ml/min. A fluorescence detector set at 235nm<sub>excit.</sub> and 300nm<sub>emiss.</sub> resulted in clean chromatograms with no interference from other drugs or endogenous material. The method was validated from 300 ng/ml to the lower limit of quantitation (2.5 ng/ml), resulting in an intra-day variation of no more than 10% for all three compounds at seven concentrations of the calibration curve. Inter-day variation did not exceed 6.8% for the three quality controls over 16 consecutive days.

### Plasma Kynurenic Acid

Plasma concentrations of kynurenic acid (KYNA) were determined using a modified validated method. (40) Plasma (0.25 mL) was treated with 3.4M perchloric acid, vortexed and centrifuged at 13,000 rpm. Fifteen microliters of the supernatant was injected for chromatographic analysis. The chromatographic system employed a Supelcosil octasilyl LC-8 column (75 x 3.0 mm, 3 $\mu$ m particle size) with a mobile phase consisting of 92% (v/v) ammonium acetate and zinc acetate (50 mmol/L each; pH adjusted to 6.5), and 8% (v/v) methanol. A flow rate of 0.55 ml/min. elutes KYNA at ~ 3.9 min., and was detected using an Agilent Model 1321 Fluorescence Detector operating at  $\lambda_{ex}$  = 251nm and  $\lambda_{em}$  = 398nm. A 7-point calibration curve encompassing the expected concentration range of KYNA was included with each run.

### Plasma Quinolinic Acid

Plasma quinolinic acid (QUIN) was measured using a gas chromatography-mass spectroscopy (GC/MS) procedure employing a deuterated internal standard (quinolinic acid-d7) for quantitation. Following the addition of the internal standard to 0.5 mL of plasma, perchloric acid was added for protein precipitation and then centrifuged. Ethyl acetate was added to the supernatant to extract QUIN, then derivatized with trifluoroacetylimidazole for 1 hour at 80°C. An aliquot of the derivatized extract was injected onto a DB-5, 30 cm column using negative chemical ionization for detection of molecular ions. A six-point calibration that encompassed the expected plasma concentrations (4 - 200 ng/mL) was included with each sample set.

### Plasma Kynurenine

Plasma kynurenine (KYN) was assayed using a modified liquid chromatography method with UV detection. (41) Following protein precipitation with 3.4 M perchloric acid, 50  $\mu$ L of the clear supernatant was injected on a reverse-phase column Phenomenex Luna C-18, 3 $\mu$ m and eluted with a phosphate buffer and acetonitrile at a flow rate of 1.2 mL/min. KYN was detected

at 226 nm with a retention time of 6.8 minutes. A six-point calibration curve that encompassed the expected concentrations (0.5 – 10  $\mu\text{M}$ ) was included with each run.

#### Plasma Total Homocysteine (tHcy)

Plasma homocysteine (tHcy) was determined using a modified published liquid chromatographic procedure validated in our laboratory. (42) Using penicillamine as the internal standard, 0.4 ml of plasma sample was reduced with dithiothreitol at 37°C for 15 minutes. Following the addition of sulfosalicylic acid, the sample was centrifuged and the supernatant transferred to the liquid chromatograph for separation and quantitation. tHcy and the internal standard were separated isocratically using a reversed-phase octyldecylsilyl 5 $\mu\text{m}$  particle column and a mobile phase consisting of diammonium hydrogen phosphate, and methanol with octanesulfonic acid as an ion-pairing reagent. At a flow rate of 1.4ml/minute, the two compounds were detected using dual-electrode coulometric detection at a potential of +1.1V (vs. a proprietary reference electrode) at a run-time of 25 minutes. A six-point calibration curve encompassing the anticipated range of plasma homocysteine was generated. Chromatographic data were collected using a PC-based chromatography software program. Intra-day variation did not exceed 8% for all six calibration levels (n = 8 each), with a low limit of quantitation of 5 nM/mL.

#### Plasma Clozapine and Norclozapine

Plasma clozapine and norclozapine were determined by a validated liquid chromatographic procedure with UV detection. Following the addition of two internal standards, mianserin and metiapine, to a one ml plasma sample, one ml of sodium hydroxide (0.5M) and 4 ml of 10% isoamyl alcohol in hexane were added and mixed for 10 minutes. After centrifugation at 2000 rpm for 10 minutes, the supernatant was transferred to a tube containing 150 $\mu\text{l}$  of 0.1M

phosphate buffer (pH~ 2.2), mixed for 10 minutes and centrifuged for 10 minutes. The organic phase was aspirated to waste and the aqueous extract was transferred to injection vials. Chromatography was carried out using a Supelcosil HS-F5 bonded silica-based column (250 x 4.6mm, 5 $\mu$ m particles) with a mobile phase consisting of 68% phosphate buffer and 32% acetonitrile modified with n-butylamine and phosphoric acid to adjust the pH to ~ 2.5. The flow rate at 1.5 to 1.7 ml/min eluted all 4 compounds within 12 minutes using a UV detector set at 245 nm. The calibration curves were linear from 25 to 2000 ng/ml for clozapine and norclozapine. Intra-day variation for norclozapine and clozapine did not exceed 7% and 4%, respectively, for the seven calibration concentrations (n = 10 at each concentration). Inter-day variation for norclozapine and clozapine did not exceed 10% (n = 11 days), based on three sets of quality controls (1500, 750, and 75 ng/mL) in duplicate added to each day's run to determine acceptability of the data.

#### Plasma Aripiprazole & Dehydroaripiprazole

Plasma aripiprazole and its major active metabolite were assayed at the Analytical Psychopharmacology Laboratory, Nathan Kline Institute, using a recently validated procedure employing liquid chromatography with UV detection. A 1 ml plasma sample, with internal standard protriptyline added, was alkalinized with sodium hydroxide and extracted with 1.5% isoamyl alcohol in heptane. Following back-extraction into acidic phosphate buffer, an aliquot of this extract was injected onto a reversed phased C-8 column and eluted with a mobile phase of phosphate buffer and acetonitrile. At a flow rate of 1.5 ml/ml, aripiprazole, internal standard, and dehydroaripiprazole were detected at 215 nm, at 5.8, 6.9 and 8.1 minutes, respectively. A nine-point calibration curve with a range of 5 to 800 ng/ml was included with each batch of samples. Intra-assay variation did not exceed 12% (n = 8 for each concentration). Inter-assay variation, assessed using three levels of quality controls for each compound, did not exceed 12.5% (n = 6 days).

### Plasma Duloxetine

Plasma duloxetine was analyzed using a procedure developed for fluoxetine. (43) To one mL of plasma, the internal standard, maprotiline, was added, made alkaline with sodium hydroxide, and extracted with isoamyl alcohol in heptane. Following a 10 minute mix and centrifuging, the extract was evaporated to dryness, and the residue derivitized with dansyl chloride. The reconstituted residue was chromatographed on an octadecylsilyl column with a mobile phase of water, acetonitrile and methanol, and with n-butylamine and phosphoric acid added. The compounds of interest were detected using a spectrofluorimeter with  $\lambda_{\text{excit}} = 255\text{nm}$  and  $\lambda_{\text{emiss}} = 515\text{nm}$ . The calibration standards ranged from 500 to 10ng/mL. The intra-assay variation for all seven calibration standards did not exceed 5% (n = 8 for each standard). Inter-day variation did not exceed 5% (n = 5 days).

### Plasma Gabapentin

An HP Chemstation data system was used to control an HP 5988B GC-MS system and to collect and quantitate the data. The GC-MS with a DB-5 column (15 m x 0.2 mm I.D., 0.25  $\mu\text{m}$ ) was operated in a NCI mode using methane: ammonia (95:5) as the reagent gas. The column was programmed from 80°C (holding for 1 min) to 280°C at an increasing rate of 30°C/min. The ion-source temperature was 150°C, and the temperatures of injector and the interface between the chromatograph and the spectrometer were set at 280°C. The internal standard deuterated gabapentin (250 ng) was added to 0.1 ml of plasma sample, followed by addition of 0.2 ml of 0.5 M perchloric acid and then centrifuged. The supernatant was transferred to a round bottom tube, and 70  $\mu\text{l}$  of 10 M KOH and Dowex AG 50 W 8x (~30 mg) were added. The content of the tube was mixed on a rotation shaker for 10 min. After centrifuging, the supernatant was discarded, and 0.2 ml of 1 N  $\text{HN}_4\text{OH}$  was added to the Dowex

precipitate twice, and gabapentin was eluted from the Dowex. The combined eluents were evaporated to dryness in a vacuum centrifuge. The residue was derivatized with 50  $\mu$ l HFBA and 10  $\mu$ l TFE at 65°C for 30 min, and was dried down. The residue was dissolved in 40  $\mu$ l of ethyl acetate and 2 $\mu$ l was injected for GC-MS analysis. The molecular ion peaks,  $[M]^+$  at  $m/z$  409 from gabapentin and at  $m/z$  412 from deuterated gabapentin, were used for quantitation, and the fragment peaks at  $m/z$  329 and at  $m/z$  332 were used as confirming ions, respectively. The standard curve was fitted to a quadratic equation with the curve encompassing a range of 10 – 1500 ng/100  $\mu$ l for gabapentin with a negligible intercept. The curve and quality controls were processed similarly with each batch of samples. The inter-assay precision was determined by testing the plasma controls containing 120, 600 and 1200 ng/100  $\mu$ l of gabapentin on five separate days. The RSD were 4.8%, 3.0% and 5.9%, respectively.

## **Dose Preparation of Glycine and Placebo/ Average Dose per Arm**

### ***Dose Preparation and Administration of Glycine in the Acute Clinical Trial***

Each dose of glycine or placebo was prepared by hand in the McLean Hospital Research Pharmacy using the titration schedules in Tables S1a-6a. The placebo was a mixture of Isomaltulose (palatinose® PST-N:Palatinose® PST-PF; 3:1 proportions) provided by Beneo, Inc..

Subject 5459 received glycine (target dose: 76 gm/d) during arm 1 and placebo during arm 2; subject 3363 received placebo during arm 1 and glycine (target dose: 79.6 gm/d) during arm 2. The titration schedules (actual and planned) for each subject for each arm of the acute augmentation trial are included in Tables S1-6 and S1a-6a, respectively. During the open-label glycine trial, the target dose for subject 5459 was 71.6 gm/d; for subject 3363, the target dose was 81.8 gm/d. The maximum sustainably tolerable doses were ~76-85% of the target doses during both short-term exposures to glycine.

Each dose consisted of a bottle containing the glycine or placebo dose (bottle A) and a separate bottle containing the flavoring additives for each dose (bottle B). True Citrus lemon crystals were used as a flavor additive to counteract the sweetness of the glycine and placebo. Because the placebo was sweeter than glycine, the flavoring formulations for the glycine doses also included a small amount of sucralose to make the two substances taste indistinguishable when mixed with lemon crystals and water. At the time of administration, each glycine/placebo dose was prepared by pouring the contents of the flavoring bottle (B) into the glycine/placebo bottle (A) and adding cold distilled water to a specific fill line on the back of bottle A (Figures S12A and S12B). The final volume for each dose was calculated and marked on the bottle as the 'fill line,' such that each reconstituted dose would result in a 20%(w/v) glycine or placebo



solution (0.2 gm glycine or placebo per mL of solution). For example, a dose of 20 gm of glycine or placebo would have a final reconstituted dose volume of 100 mL.

At the time of each dose, the subject poured the flavoring into the bottle containing that dose of glycine or placebo and added water to the specified fill line. The bottle was then shaken vigorously for several minutes and the dose was slowly sipped until all of it was consumed. All doses were taken after a meal to minimize nausea and GI distress. The two bottles containing each dose were packed in a small sealed baggie and the three baggies corresponding to that day's doses were packed in a large baggie, labeled week 1, day 1, etc. A two-week supply of doses was shipped to each subject with week 2's doses on the bottom layer and week 1's doses on the top layer of the shipping box (Figure S12C). Each week of the study started on a Sunday and ended on a Saturday. Each subject also kept a daily log sheet that specified week 1, day 1, day 2, etc for each arm. These features made it straightforward for subjects to know which day corresponded to that day's dose. The packaging allowed subjects to conveniently carry a given dose or the entire day's doses if planning to be away from home during part or all of the day.

When it was necessary to lower the amount of a prepared dose due to the emergence of side effects, the subjects were instructed to mix the dose as usual, shake it up and then to pour a specified number of cc's of liquid into a calibrated cylinder that had been provided and to dispose of the poured out liquid. The lower dose was then re-shaken and consumed. Dose reductions required calculating the new final dose volume of the 20% (w/v) glycine/placebo solution (0.2 gm glycine or placebo/mL of solution) and instructing subjects to discard excess amounts.

Dose volumes were calculated as follows:

$$\text{Dose volume (mL)} = \frac{\# \text{ gm glycine or placebo}}{0.2 \text{ gm glycine or placebo/mL of solution}}$$

The appropriate amount of each dose reduction was determined by the study psychiatrist (JAB) and PI (DLL) based on the subject's recent history of side effect-free dosing; the specific number of cc's to be poured out and discarded so as to result in a correct new dose was calculated by the McLean Hospital Research Pharmacist (LJG). These dose reductions were carried out during a phone call between the subject and the PI to make sure that the method was correctly understood.

Throughout the study, the PI was in possession of a sealed envelope prepared by the McLean Hospital Research Pharmacist in case it became necessary to break the blind due to untoward side effects. The blind remained unbroken throughout the study and the sealed envelope was returned to the pharmacist at the end of the study (Figure S12D).

All empty containers were returned to the pharmacy at the end of the study for disposal (Figure S12E).

### ***Dose Preparation and Administration of Glycine in the Chronic Clinical Trial***

Glycine was supplied by Letco Pharmaceuticals. The McLean Hospital Research Pharmacy dispensed 500 gm and 1 kg jars of glycine to each subject with calibrated measuring utensils (teaspoons/tablespoons, mixing containers, graduated cylinders), TrueCitrus Lemon and Lime flavoring packets, and instructions for measuring and mixing each dose according to a prepared titration schedule (Figure S12F; Tables S7a and S8a).

At the time of administration, subjects prepared doses by combining specified amounts of glycine powder and distilled water, to result in the correct volume of 20% glycine solution (w/v) (0.2 gm glycine/mL of solution) for each dose and flavored it to taste.

The same procedures described above were repeated when doses had to be reduced due to GI side effects.

**Average Dose per Arm**

The mean daily dose (gm) and mean gm/kg dose for each arm and each subject are shown in the table below. During the acute trial, neither the mean daily dose nor the mean gm/kg differed in the double-blind and open-label arms for either participant ( $P > 0.20$  for each). Both the mean daily dose and the mean gm/kg in the acute glycine treatment arms were significantly higher than in the chronic glycine arm for each participant ( $P < 0.001$  for each).

**Mean Daily Dose (gm) and Mean gm/kg Dose for Each Glycine Treatment Arm**

|                                | 3363                                                       | 5459                                                       |
|--------------------------------|------------------------------------------------------------|------------------------------------------------------------|
|                                | Mean Daily Dose (gm) $\pm$ s.d.//<br>mean gm/kg $\pm$ s.d. | Mean Daily Dose (gm) $\pm$ s.d.//<br>mean gm/kg $\pm$ s.d. |
| Acute Double-blind Glycine Arm | 54.18 $\pm$ 22.11 //<br>0.53 $\pm$ 0.22                    | 53.07 $\pm$ 22.09 //<br>0.58 $\pm$ 0.24                    |
| Acute Open-label Glycine Arm   | 55.28 $\pm$ 19.63 //<br>0.51 $\pm$ 0.18                    | 53.33 $\pm$ 18.86 //<br>0.58 $\pm$ 0.21                    |
| Both Acute Glycine Arms        | 54.73 $\pm$ 20.79 //<br>0.52 $\pm$ 0.20***                 | 53.20 $\pm$ 20.37 //<br>0.58 $\pm$ 0.22***                 |
| Chronic Open-Label Glycine     | 34.27 $\pm$ 13.65 //<br>0.31 ( $\pm$ 0.13)****             | 30.01 $\pm$ 16.59 //<br>0.31 ( $\pm$ 0.17)****             |
| *** range:                     | (6.00, 81.90) // (0.06, 0.78)                              | (6.00, 75.90) // (0.07, 0.84)                              |
| **** range:                    | (3.60, 64.80) // (0.03, 0.60)                              | (5.00, 63.00) // (0.05, 0.67)                              |

## DCS Augmentation Trials

Compared with glycine, DCS has 65% activity at NMDAR containing the NR2B subunit, 90% activity at NMDAR containing the NR2A or NR2D subunit and 200% activity at NMDAR containing the NR2C subunit. (44) Each trial included a double-blind placebo-controlled phase and open-label phases.

### Subject Information

At the beginning of the DCS augmentation trial, the two participants included one female, age 62 (5459) with a diagnosis of bipolar disorder with psychotic features, and one male, age 34 (3363) with a diagnosis of schizo-affective disorder. By the end of the chronic DCS arm of the study, 5459 was 63 years old and subject 3363 was 35 years old.

### Medication Information

During all arms of the DCS trial medications were kept stable: 3363 - clozaril (100 mg/d), aripiprazole (15 mg/d), celexa (40 mg/d); 5459 - clozaril (50 mg/d), lithium (450 mg/d), gabapentin (300 mg/d), cymbalta (120 mg/d), mirapex (0.375 mg/d)\*; phendimetrazine (35 mg/d)\*.

### Additional Clinical Effects

Data from other symptom domains (PANSS) salient for 5459 and 3363 are shown in Figures S13A-C and Figures S13D-G, respectively, and in Figure S14. On the CGI, both subjects went from moderately ill to borderline ill and symptoms were very much improved during exposure to DCS; placebo ratings were the same as baseline (Figure S15).

---

\* Change in psychotropic drug/dose compared with one or all glycine trials.

## Neurocognition

The MATRICS Consensus Cognitive Battery (45) was administered at baseline, in week 6 of each of the three arms of the acute glycine study, at the end of weeks 16 and 27 of the chronic glycine study, and in week 8 of the first open-label exposure to DCS. Since no consistent changes in neurocognition were observed as a function of glycine or DCS exposure, MATRICS testing was discontinued. See Figure S7 for scores on the MATRICS cognitive domains and overall composite score.

## Associations between 9p24.1 Region and Neuropsychiatric Disorders

### Schizophrenia

SNPs within 20 kb of the *GLDC* and *KDM4C* genes had potential associations ( $P < 1 \times 10^{-4}$ ) with schizophrenia. (46) Two patients in a schizophrenia cohort at Duke had deletions overlapping the same 9p24.1 region. (47) Sequencing of one of these patients (from Rujescu) by the Lupski lab shows that *GLDC*, *IL33*, *TD52L3*, and *UHRF2* are completely deleted and *KDM4C* is partially deleted (Figure S16). In another report, a schizophrenia proband had a duplication of most of *GLDC* and part of *KDM4C*. (48) Xu *et al.* described a paternally inherited 1042.2 kb duplicated region on 9p24.1 (4,968,475-6,005,618) in a schizo-affective proband; this CNV included ten genes that overlap with the rearrangement reported here, but did not include *IL33*, *TP52L3*, *UHRF2*, *GLDC*, and *KDM4C*. (49) Stewart *et al.* reported a full duplication of *GLDC* and a partial duplication of *UHRF2* and *KDM4C* in a patient with diagnoses of schizophrenia and idiopathic epilepsy. (50) The recent rare CNV analysis of a cohort of 20k schizophrenia cases and 20k controls from the Psychiatric Genetics Consortium reported *GLDC* duplications in 12 cases and 5 controls ( $P = 0.1$ ). Most were partial duplications of the first several exons. There was only one case with a duplication of the entire *GLDC* gene, (51) underscoring the relative rarity of this CNV.

### Bipolar Disorder

In addition to the original report of our duplication-triplication, (52) Priebe *et al.* described duplications of *GLDC* and *KDM4C* in bipolar disorder with age of onset  $\leq 21$ . (53) Madison *et al.* described a  $>100$  kb CNV deletion at 9p24.1 near Malhotra *et al.* 2011 but not identical - in one bipolar proband and one unaffected parent, but it is not clear what genes were included. (54)

### Depression and Suicide Attempts

Large Arab Bedouin kindred with high rate of in-breeding. Duplication of *UHRF2* and *GLDC* is associated with increased risk for suicide attempts: OR of 5.4-13.1 Duplication is incompletely penetrant. Duplication or deletion of full *GLDC* gene. (55)

### Autism Spectrum Disorder (ASD)

An ASD cohort had rare CNVs impacting genes in the 9p24.1 region: deletions (4) or duplications (1) in *RLN1* and *RLN2*, two deletions in *GLDC* (maternally inherited), and one duplication (maternally inherited) and one deletion (*de novo*) of *KDM4C*. (56) A later study of an ASD cohort by the same group reported a partial *GLDC* duplication in one simplex proband (maternally inherited), and a partial *GLDC+ KDM4C* duplication in one simplex proband (paternally inherited) and in one multiplex (maternally inherited) proband. (57) A study of SNPs in the 9p24 and 11p12-p13 regions containing glutamate metabolism genes reported the strongest associations between a SNP in *JMJ2DC* (aka *KDM4C*) (rs1340513) and ASD. (58) This same SNP was associated with ASD in female containing families in the Autism Genome Project Consortium study (9p24.1 (Zlr  $\frac{1}{4}$  3.21; m-P  $\frac{1}{4}$  0.0007). (59) In another analysis of this same sample, loss of function CNVs occurred in *RLN1* and *RLN2* in four cases and in *GLDC* in one case, and gain of function CNVs occurred in *RLN1* and *RLN2* in one case and in *KDM4C* in one case. (56) Nord *et al.* reported a paternally inherited deletion of part of *GLDC* in one ASD proband (chr9:6,560,979- 6,571,584). (60) Two brothers in the AGRE collection had a paternally inherited partial duplication of *GLDC/KDM4C* (Figure S17). (61) The Simons Simplex Collection also contains four families with partial duplications of *KDM4C* and *GLDC*. In 24 discordant severe autism sibling pairs, *GLDC* was differentially regulated in affecteds compared with siblings; 5/24 sib pairs showed up-regulation of at least 1.2-fold and 15 sib pairs showed down-regulation of at least 1.2-fold. (62) A breakpoint within the *KDM4C* gene was found in a patient

with ASD and gonadal dysgenesis. (63) Both the AGRE and the Simons Simplex Collections contain families in which probands have CNVs involving *GLDC* and *KDM4C*.

#### Intellectual Disability (ID)/Pervasive Developmental Delay (PDD)

Girirajan *et al.* reported novel overlapping deletions (3.5 Mbp and 9 Mbp) on chromosome 9p24 in two unrelated individuals with clinical features of ID and PDD-Not Otherwise Specified. (64) One of the two deletions included *GLDC*, *UHRF2*, *KDM4C*, *IL33*, *RANBP6*, *RLN1*, *RLN2*, *c9orf46*, *CD274*, *PDCD1LG2*, *KIAA1432*, *ERMP1*, *MLANA*, *KIAA2026*, and *TP52L3*. They also reported a paternally inherited deletion in a dyslexic that included all of *GLDC* and *UHRF2* and part of *KDM4C* (see supplementary figure 2 of (64)). Yamamoto *et al.* reported that that one patient with ID and complex partial epilepsy had a deletion of *NARG2* and *RORA* on 15q21.3-q22.2 and a 1.6 Mb dup in 9p24.1 (5,420,412-7,029,245) that included all of *GLDC*, *UHRF2*, *RANBP6*, *IL33*, *KIAA2026*, and most of *KDM4C*. (65)

#### Other

Girirajan *et al.* reported a a paternally inherited deletion in a dyslexic that included all of *GLDC* and *UHRF2* and part of *KDM4C*. (64) An 8 Mb *de novo* deletion on 9p, including all of the genes in the 9p24.1 region in family 611, was reported in a proband with a developmental disability. (66) Martinez-Jacobo *et al.* presented a case report of trisomy 9p24.3-9q21.11 involving a 69 Mb duplicated segment that included duplication of *GLDC* and *KDM4C* in a patient with multiple psychotic episodes and plus multiple dysmorphologies. (67) See also (11).



**Supplemental References**

1. Lupski JR (2016): Clinical genomics: From a truly personal genome viewpoint. *Hum Genet.* 135:591-601.
2. Bollag G, Hirth P, Tsai J, Zhang J, Ibrahim PN, Cho H, et al. (2010): Clinical efficacy of a RAF inhibitor needs broad target blockade in BRAF-mutant melanoma. *Nature.* 467:596-599.
3. Bennett J, Ashtari M, Wellman J, Marshall KA, Cyckowski LL, Chung DC, et al. (2012): AAV2 gene therapy readministration in three adults with congenital blindness. *Sci Translational Med.* 4:120ra115.
4. Chen P, Lin J-J, Lu C-S, Ong C-T, Hsieh PF, Chih-Chao Yang C-C, et al. (2011): Carbamazepine-induced toxic effects and HLA-B\*1502 screening in Taiwan. *N Engl J Med.* 364:1126-1133.
5. Scolnick EM (2010): 3rd Annual Report: Executive Summary Version. [http://broadharvardedu/files/shared/psych/\\_Center\\_Annual\\_ReportvExecSum\\_-\\_2009\\_for\\_webpdf](http://broadharvardedu/files/shared/psych/_Center_Annual_ReportvExecSum_-_2009_for_webpdf).
6. Crettol S, de Leon J, Hiemke C, Eap CB (2014): Pharmacogenomics in psychiatry: From therapeutic drug monitoring to genomic medicine. *Clin Pharmacol Ther.* 95:254-257.
7. Chung W-H, Hung S, Hong H-S, Hsieh M-S, Yang Y-C, Ho H-C, et al. (2004): A marker for Stevens–Johnson syndrome. *Nature.* 428:486.
8. Marwick KFM, Stevenson AJ, Davies C, Lawrie SM (2018): Application of n-of-1 treatment trials in schizophrenia: Systematic review. *Br J Psychiatry.* epub-May.
9. Bacchetti P, Deeks SG, McCune JM (2011): Breaking free of sample size dogma to perform innovative translational research. *Sci Translational Med.* 3:87ps24.
10. TCW J, Carvalho CMB, Yuan B, Gu S, McCarthy S, Malhotra D, et al. (2017): Divergent levels of marker chromosomes in an hiPSC-based model of psychosis. *Stem Cell Reports.* 8:519-528.
11. Grochowski CM, Gu S, Yuan B, TCW J, Brennand KJ, Sebat J, et al. (2018): Marker chromosome genomic structure and temporal origin implicate a chromoanasythesis event in a family with pleiotropic psychiatric phenotypes. *Human Mutation.* 39:939-946.
12. Ji Y, Hebring S, Zhu H, Jenkins GD, Biernacka J, Snyder K, et al. (2011): Glycine and a glycine dehydrogenase (*GLDC*) SNP as citalopram/escitalopram response biomarkers in depression: Pharmacometabolomics-informed pharmacogenomics. *Clin Pharmacol Ther.* 89:97-104.
13. Perry RB, Fainzilber M (2009): Nuclear transport factors in neuronal function. *Seminars in Cell & Developmental Biology.* 20:600-606.

14. Thompson KR, Otis KO, Chen DY, Zhao Y, O'Dell TJ, Martin KC (2004): Synapse to nucleus signaling during long-term synaptic plasticity; a role for the classical active nuclear import pathway. *Neuron*. 44:997-1009.
15. Petrovski S, Wang Q, Heinzen EL, Allen AS, Goldstein DB (2013): Genic intolerance to functional variation and the interpretation of personal genomes. *PLoS Genet*. 9:e1003709.
16. Lek M, Karczewski KJ, Minikel EV, Samocha KE, Banks E, Fennell T, et al. (2016): Analysis of protein-coding genetic variation in 60,706 humans. *Nature*. 536:285-291.
17. Cloos PA, Christensen J, Agger K, Maiolica A, Rappsilber J, Antal T, et al. (2006): The putative oncogene GASC1 demethylates tri- and dimethylated lysine 9 on histone H3. *Nature*. 442:307-311.
18. Jiang Y, Jakovcevski M, Bharadwaj R, Connor C, Schroeder FA, Lin CL, et al. (2010): Setdb1 histone methyltransferase regulates mood-related behaviors and expression of the NMDA receptor subunit NR2B. *J Neurosci*. 30:7152–7167.
19. Chase KA, Gavin DP, Guidotti A, Sharma RP (2013): Histone methylation at H3K9; evidence for a restrictive epigenome in schizophrenia. *Schiz Res*. 149:15-20.
20. The Network and Pathway Analysis Subgroup of the Psychiatric Genomics Consortium (2015): Psychiatric genome-wide association study analyses implicate neuronal, immune and histone pathways. *Nat Neurosci*. 18:199-209.
21. Lu H, Hallstrom TC (2013): The nuclear protein UHRF2 is a direct target of the transcription factor E2F1 in the induction of apoptosis. *J Biol Chem*. 288:23833-23843.
22. Benes FM, Matzilevich D, Burke RE, Walsh J (2006): The expression of proapoptosis genes is increased in bipolar disorder but not in schizophrenia. *Mol Psychiatry*. 11:241-251.
23. Zhou F, Zhang L, Wang A, Song B, Gong K, Zhang L, et al. (2008): The association of GSK3 beta with E2F1 facilitates nerve growth factor-induced neural cell differentiation. *J Biol Chem*. 283:14506-14515.
24. Gould TD, Manji HK (2005): Glycogen synthase kinase-3: A putative molecular target for lithium mimetic drugs. *Neuropsychopharmacology*. 30:1223-1237.
25. Pan JQ, Lewis MC, Ketterman JK, Clore EL, Riley M, Richards KR, et al. (2011): AKT kinase activity is required for lithium to modulate mood-related behaviors in mice. *Neuropsychopharmacology*. 36:1397-1411.
26. Lovestone S, Killick R, Di Forti M, Murray R (2007): Schizophrenia as a GSK-3 dysregulation disorder. *Trends Neurosci*. 30.:142-149.
27. Freyberg Z, Ferrando SJ, Javitch JA (2010): Roles of the Akt/GSK-3 and Wnt signaling pathways in schizophrenia and antipsychotic drug action. *Am J Psychiatry*. 167:388-396.
28. Chen XR, Sun SC, Teng SW, Li L, Bie YF, Yu H, et al. (2018): Uhrf2 deletion impairs the formation of hippocampus-dependent memory by changing the structure of the dentate gyrus. *Brain Structure and Function*. 223:609-618.

29. Ali S, Mohs A, Thomas M, Klare J, Ross R, Schmitz ML, et al. (2011): The dual function cytokine IL-33 interacts with the transcription factor NF- $\kappa$ B to dampen NF- $\kappa$ B-stimulated gene transcription. *J Immunology*. 187:1609-1616.
30. Vainchtein ID, Chin G, Cho FS, Kelley KW, Miller JG, Chien EC, et al. (2018): Astrocyte-derived interleukin-33 promotes microglial synapse engulfment and neural circuit development. *Science*. 359:1269–1273.
31. (1994): *Diagnostic and Statistical Manual of Mental Disorders (DSM-IV)*. Washington, DC: American Psychiatric Association.
32. Spitzer R, Williams J, Gibbon M, First M (1994): *Structured Clinical Interview for DSM-IV - Patient edition*. Washington, D.C.: American Psychiatric Association.
33. Schwarcz R, Bruno JP, Muchowski PJ, Wu H-Q (2012): Kynurenines in the mammalian brain: When physiology meets pathology. *Nat Rev Neurosci*. 13:465-477.
34. Lipton SA, Kim W, Choi Y, Kumar S, D'Emilia DM, Rayadu PV, et al. (1997): Neurotoxicity associated with dual actions of homocysteine at the N-methyl-D-aspartate receptor. *Proc Natl Acad Sci*. 94:5923–5928.
35. Goff DC, Tsai G, Levitt J, Amico E, Manoach D, Schoenfeld D, et al. (1999b): A placebo-controlled trial of D-cycloserine added to conventional neuroleptics in patients with schizophrenia. *Arch Gen Psychiatry*. 56:21-27.
36. Hariharan M, Naga S, VanNoord T (1993): Systematic approach to the development of plasma amino acid analysis by high-performance liquid chromatography with ultraviolet detection with precolumn derivatization using phenyl isothiocyanate. *J Chromatogr*. 621:15-22.
37. Hashimoto A, Nishikawa T, Oka T, Takahishi K, Hayashi T (1992): Determination of free amino acid enantiomers in rat brain and serum by high-performance liquid chromatography after derivatization with N-tert.-butyloxycarbonyl-L-cysteine and o-phthalaldehyde. *J Chromatogr*. 582:41-48.
38. Struys EA, Guerand WS, ten Brink HJ, Jakobs C (1999): Combined method for the determination of gamma-aminobutyric acid and beta-alanine in CSF by stable isotope dilution mass spectrometry. *J Chromatogr B Biomed Sci Appl*. 732:245-249.
39. Oyehaug E, Ostensen ET, Salvesen B (1982): Determination of the antidepressant agent citalopram and metabolites in plasma by liquid chromatography with fluorescence detection. *J Chromatogr*. 227:129-135.
40. Pi LG, Tang AG, Mo XM, Luo XB, Ao X (2009): More rapid and sensitive method for the simultaneous determination of tryptophan and kynurenic acid by HPLC. *Clin Biochem*. 42:420-425.
41. Zhang X, He Y, Ding M (2009): Simultaneous determination of tryptophan and kynurenine in plasma samples of children patients with Kawasaki disease by high-performance liquid chromatography with programmed wavelength ultraviolet detection. *J Chromatogr B Analyt Technol Biomed Life Sci*. 8:1678-1682.

42. Martin SC, Tsakas-Ampatzis I, Bartlett WA, Jones AF (1999): Measurement of plasma total homocysteine by HPLC with coulometric detection. *Clin Chem.* 45:150-152.
43. Suckow RF, Zhang MF, Cooper TB (1992): Sensitive and selective liquid chromatographic assay of fluoxetine and norfluoxetine in plasma with Fluorescence detection after precolumn derivatization. *Clin Chem.* 38:1756-1761.
44. Dravid SM, Burger PB, Prakash A, Geballe MT, Yadav R, Le P, et al. (2010): Structural determinants of D-cycloserine efficacy at the NR1/NR2C NMDA receptors. *J Neurosci.* 30:2741-2754.
45. Kern RS, Gold JM, Dickinson D, Green MF, Nuechterlein KH, Baade LE, et al. (2011): The MCCB impairment profile for schizophrenia outpatients: Results from the MATRICS psychometric and standardization study. *Schiz Res.* 126:124-131.
46. International Schizophrenia Consortium (2009): Common polygenic variation contributes to risk of schizophrenia and bipolar disorder. *Nature.* 460:748-751.
47. Need AC, Ge D, Weale ME, Maia J, Feng S, Heinzen EL, et al. (2009): A genome-wide investigation of SNPs and CNVs in schizophrenia. *PLoS Genetics.* 5:e1000373.
48. Priebe L, Degenhardt F, Strohmaier J, Breuer R, Herms S, Witt SH, et al. (2013): Copy number variants in German patients with schizophrenia. *PLoS One.* 8:e64035.
49. Xu B, Roos JW, Levy S, van Rensburg EJ, Gogos JA, Karayiorgou M (2008): Strong association of *de novo* copy number mutations with sporadic schizophrenia. *Nature genetics.* 40:880-885.
50. Stewart LR, Hall AL, Kang S-HL, Shaw CA, Beaudet AL (2011): High frequency of known copy number abnormalities and maternal duplication 15q11-q13 in patients with combined schizophrenia and epilepsy. *BMJ Med Genet.* 12:154.
51. Marshall CR, Howrigan DP, Merico D, Thiruvahindrapuram B, Wu W, Greer DS, et al. (2017): Contribution of copy number variants to schizophrenia from a genome-wide study of 41,321 subjects. *Nature genetics.* 49:27-35.
52. Malhotra D, McCarthy S, Michaelson JJ, Vacic V, Burdick KE, Yoon S, et al. (2011): High frequencies of *de novo* CNVs in bipolar disorder and schizophrenia. *Neuron.* 72:951-963.
53. Priebe L, Degenhardt FA, Herms S, Haenisch B, Mattheisen M, Nieratschker V, et al. (2012): Genome-wide survey implicates the influence of copy number variants (CNVs) in the development of early-onset bipolar disorder. *Mol Psychiatry.* 17:421-432.
54. Madison JM, Zhou F, Nigam A, Hussain A, Barker DD, Nehme R, et al. (2015): Characterization of bipolar disorder patient-specific induced pluripotent stem cells from a family reveals neurodevelopmental and mRNA expression abnormalities. *Mol Psychiatry.* 20:703-717.
55. Melhem NM, Hamdan S, Klei L, Wood S, Zelazny J, Frisch A, et al. (2017): Runs of homozygosity, copy number variation, and risk for depression and suicidal behavior in an Arab Bedouin kindred. *Psychiatr Genet.* 27:169-177.

56. Pinto D, Pagnamenta AT, Klei L, Anney R, Merico D, Regan R, et al. (2010): Functional impact of global rare copy number variation in autism spectrum disorders. *Nature*. 466:368-372.
57. Pinto D, Delaby E, Merico D, Barbosa M, Merikangas A, Klei L, et al. (2014): Convergence of genes and cellular pathways dysregulated in autism spectrum disorders. *Am J Hum Genet*. 94:677-694.
58. Kantojärvi K, Onkamo P, Vanhala R, Alen R, Hedman M, Sajantila A, et al. (2010): Analysis of 9p24 and 11p12-13 regions in autism spectrum disorders: rs1340513 in the JMJD2C gene is associated with ASDs in Finnish sample. *Psychiatr Genet*. 20:102-108.
59. Autism Genome Project Consortium (2007): Mapping autism risk loci using genetic linkage and chromosomal rearrangements. *Nature genetics*. 39:319-328.
60. Nord AS, Roeb W, Dickel DE, Walsh T, Kusenda M, O'Connor KL, et al. (2011): Reduced transcript expression of genes affected by inherited and *de novo* CNVs in autism. *Eur J Hum Genet*. 19:727-731.
61. Girirajan S, Dennis MY, Baker C, Malig M, Coe BP, Campbell CD, et al. (2013): Refinement and discovery of new hotspots of copy-number variation associated with autism spectrum disorder. *Am J Hum Genet*. 92:221-237.
62. Seno MMG, Hu P, Gwadry FG, Pinto D, Marshall CR, Casallo G, et al. (2011): Gene and miRNA expression profiles in autism spectrum disorders. *Brain Res*. 1380:85-97.
63. Vinci G, Chantot-Bastaraud S, El Houate B, Lortat-Jacob S, Barauner R, McElreavey K (2007): Association of deletion 9p, 46,XY gonadal dysgenesis and autistic spectrum disorder. *Mol Hum Reprod*. 9:685-689.
64. Girirajan S, Brkanac Z, Coe BP, Baker C, Vives L, Vu TH, et al. (2011): Relative burden of large CNVs on a range of neurodevelopmental phenotypes. *PLoS Genet*. 7:e1002334.
65. Yamamoto T, Mencarelli MA, Di Marco C, Mucciolo M, Vascotto M, Balestri P, et al. (2014): Overlapping microdeletions involving 15q22.2 narrow the critical region for intellectual disability to *NARG2* and *RORA*. *Eur J Med Genet*. 57:163-168.
66. Deciphering Developmental Disorders Study (2015): Large-scale discovery of novel genetic causes of developmental disorders. *Nature*. 519:223–228.
67. Martínez-Jacobo L, Ortíz-López R, Rizo-Méndez A, García-Molina V, Santuario-Facio SK, Rivas F, et al. (2015): Clinical and molecular delineation of duplication 9p24.3q21.11 in a patient with psychotic behavior. *Gene*. 560:124-127.
68. Wolosker H, Balu DT, Coyle JT (2016): The rise and fall of the D-serine-mediated gliotransmission hypothesis. *Trends in Neurosci*. 39:712-721.

**Table S1: Double-Blind Exposure to Glycine – Subject 5459: Actual Titration**

| Week | Day | Day (cumulative) | Day of Week | Dose (g) TID | Total Daily Dose (g) | Deviation from Scheduled Dose                                        |
|------|-----|------------------|-------------|--------------|----------------------|----------------------------------------------------------------------|
| 1    | 1   | 1                | Sunday      | 2            | 6                    |                                                                      |
| 1    | 2   | 2                | Monday      | 3            | 9                    |                                                                      |
| 1    | 3   | 3                | Tuesday     | 4            | 12                   |                                                                      |
| 1    | 4   | 4                | Wednesday   | 5            | 15                   |                                                                      |
| 1    | 5   | 5                | Thursday    | 6            | 18                   |                                                                      |
| 1    | 6   | 6                | Friday      | 7            | 21                   |                                                                      |
| 1    | 7   | 7                | Saturday    | 8            | 24                   |                                                                      |
| 2    | 1   | 8                | Sunday      | 9            | 27                   |                                                                      |
| 2    | 2   | 9                | Monday      | 10           | 30                   |                                                                      |
| 2    | 3   | 10               | Tuesday     | 12           | 36                   |                                                                      |
| 2    | 4   | 11               | Wednesday   | 14           | 42                   |                                                                      |
| 2    | 5   | 12               | Thursday    | 16           | 48                   |                                                                      |
| 2    | 6   | 13               | Friday      | 18           | 54                   |                                                                      |
| 2    | 7   | 14               | Saturday    | 20           | 60                   |                                                                      |
| 3    | 1   | 15               | Sunday      | 22           | 66                   |                                                                      |
| 3    | 2   | 16               | Monday      | 24           | 72                   |                                                                      |
| 3    | 3   | 17               | Tuesday     | 25.3         | 76                   |                                                                      |
| 3    | 4   | 18               | Wednesday   | 25.3         | 76                   |                                                                      |
| 3    | 5   | 19               | Thursday    | 25.3         | 76                   |                                                                      |
| 3    | 6   | 20               | Friday      | 0            | 0                    | Vomiting/diarrhea after breakfast dose; all other doses for day held |
| 3    | 7   | 21               | Saturday    | 0            | 0                    | All doses held                                                       |
| 4    | 1   | 22               | Sunday      | 20           | 40                   | 2 doses (lunch and dinner)                                           |
| 4    | 2   | 23               | Monday      | 20           | 60                   |                                                                      |
| 4    | 3   | 24               | Tuesday     | 20           | 60                   |                                                                      |
| 4    | 4   | 25               | Wednesday   | 20           | 60                   |                                                                      |
| 4    | 5   | 26               | Thursday    | 20           | 60                   |                                                                      |
| 4    | 6   | 27               | Friday      | 20           | 40                   | Forgot lunch dose                                                    |
| 4    | 7   | 28               | Saturday    | 21.33        | 64                   |                                                                      |
| 5    | 1   | 29               | Sunday      | 21.33        | 64                   |                                                                      |
| 5    | 2   | 30               | Monday      | 21.33        | 64                   |                                                                      |

**Table S1: Double-Blind Exposure to Glycine – Subject 5459: Actual Titration**

| <b>Week</b> | <b>Day</b> | <b>Day<br/>(cumulative)</b> | <b>Day of<br/>Week</b> | <b>Dose (g)<br/>TID</b> | <b>Total Daily<br/>Dose (g)</b> | <b>Deviation from<br/>Scheduled Dose</b>       |
|-------------|------------|-----------------------------|------------------------|-------------------------|---------------------------------|------------------------------------------------|
| 5           | 3          | 31                          | Tuesday                | 21.33                   | 64                              |                                                |
| 5           | 4          | 32                          | Wednesday              | 21.33                   | 64                              |                                                |
| 5           | 5          | 33                          | Thursday               | 21.33                   | 64                              |                                                |
| 5           | 6          | 34                          | Friday                 | 21.33                   | 64                              |                                                |
| 5           | 7          | 35                          | Saturday               | 21.33                   | 64                              |                                                |
| 6           | 1          | 36                          | Sunday                 | 25.3/21.33<br>BID       | 68                              | Accidentally took<br>full dose at<br>breakfast |
| 6           | 2          | 37                          | Monday                 | 25.3                    | 76                              |                                                |
| 6           | 3          | 38                          | Tuesday                | 25.3                    | 76                              |                                                |
| 6           | 4          | 39                          | Wednesday              | 25.3                    | 76                              |                                                |
| 6           | 5          | 40                          | Thursday               | 25.3                    | 76                              |                                                |
| 6           | 6          | 41                          | Friday                 | 25.3                    | 76                              |                                                |
| 6           | 7          | 42                          | Saturday               | 25.3                    | 76                              |                                                |

**Table S2: Double-Blind Exposure to Placebo - Subject 5459: Actual Titration**

| <b>Week</b> | <b>Day</b> | <b>Day<br/>(cumulative)</b> | <b>Day of Week</b> | <b>Dose (g) TID</b> | <b>Total Daily Dose<br/>(g)</b> | <b>Deviation from<br/>Scheduled Dose</b> |
|-------------|------------|-----------------------------|--------------------|---------------------|---------------------------------|------------------------------------------|
| 1           | 1          | 1                           | Sunday             | 2                   | 6                               |                                          |
| 1           | 2          | 2                           | Monday             | 3                   | 9                               |                                          |
| 1           | 3          | 3                           | Tuesday            | 4                   | 12                              |                                          |
| 1           | 4          | 4                           | Wednesday          | 5                   | 15                              |                                          |
| 1           | 5          | 5                           | Thursday           | 6                   | 18                              |                                          |
| 1           | 6          | 6                           | Friday             | 7                   | 21                              |                                          |
| 1           | 7          | 7                           | Saturday           | 8                   | 24                              |                                          |
| 2           | 1          | 8                           | Sunday             | 9                   | 27                              |                                          |
| 2           | 2          | 9                           | Monday             | 10                  | 20                              | Missed dinner dose                       |
| 2           | 3          | 10                          | Tuesday            | 12                  | 36                              |                                          |
| 2           | 4          | 11                          | Wednesday          | 14                  | 42                              |                                          |
| 2           | 5          | 12                          | Thursday           | 16                  | 48                              |                                          |
| 2           | 6          | 13                          | Friday             | 18                  | 54                              |                                          |
| 2           | 7          | 14                          | Saturday           | 20                  | 60                              |                                          |
| 3           | 1          | 15                          | Sunday             | 22                  | 66                              |                                          |
| 3           | 2          | 16                          | Monday             | 24.2                | 72.7                            |                                          |
| 3           | 3          | 17                          | Tuesday            | 24.2                | 72.7                            |                                          |
| 3           | 4          | 18                          | Wednesday          | 24.2                | 72.7                            |                                          |
| 3           | 5          | 19                          | Thursday           | 24.2                | 48.4                            | Missed dinner dose                       |
| 3           | 6          | 20                          | Friday             | 24.2                | 72.7                            |                                          |
| 3           | 7          | 21                          | Saturday           | 24.2                | 72.7                            |                                          |
| 4           | 1          | 22                          | Sunday             | 24.2                | 72.7                            |                                          |
| 4           | 2          | 23                          | Monday             | 24.2                | 72.7                            |                                          |



**Table S2: Double-Blind Exposure to Placebo - Subject 5459: Actual Titration**

| <b>Week</b> | <b>Day</b> | <b>Day<br/>(cumulative)</b> | <b>Day of Week</b> | <b>Dose (g) TID</b> | <b>Total Daily Dose<br/>(g)</b> | <b>Deviation from<br/>Scheduled Dose</b> |
|-------------|------------|-----------------------------|--------------------|---------------------|---------------------------------|------------------------------------------|
| 4           | 3          | 24                          | Tuesday            | 24.2                | 72.7                            |                                          |
| 4           | 4          | 25                          | Wednesday          | 24.2                | 72.7                            |                                          |
| 4           | 5          | 26                          | Thursday           | 24.2                | 72.7                            |                                          |
| 4           | 6          | 27                          | Friday             | 24.2                | 72.7                            |                                          |
| 4           | 7          | 28                          | Saturday           | 24.2                | 72.7                            |                                          |
| 5           | 1          | 29                          | Sunday             | 24.2                | 72.7                            |                                          |
| 5           | 2          | 30                          | Monday             | 24.2                | 48.4                            | Missed dinner dose                       |
| 5           | 3          | 31                          | Tuesday            | 24.2                | 72.7                            |                                          |
| 5           | 4          | 32                          | Wednesday          | 24.2                | 72.7                            |                                          |
| 5           | 5          | 33                          | Thursday           | 24.2                | 72.7                            |                                          |
| 5           | 6          | 34                          | Friday             | 24.2                | 72.7                            |                                          |
| 5           | 7          | 35                          | Saturday           | 24.2                | 72.7                            |                                          |
| 6           | 1          | 36                          | Sunday             | 24.2                | 72.7                            |                                          |
| 6           | 2          | 37                          | Monday             | 24.2                | 72.7                            |                                          |
| 6           | 3          | 38                          | Tuesday            | 24.2                | 72.7                            |                                          |
| 6           | 4          | 39                          | Wednesday          | 24.2                | 72.7                            |                                          |
| 6           | 5          | 40                          | Thursday           | 24.2                | 48.4                            | Missed dinner dose                       |
| 6           | 6          | 41                          | Friday             | 24.2                | 72.7                            |                                          |
| 6           | 7          | 42                          | Saturday           | 24.2                | 72.7                            |                                          |

**Table S3: Open-Label Exposure to Glycine – Subject 5459: Actual Titration**

| <b>Week</b> | <b>Day</b> | <b>Day<br/>(cumulative)</b> | <b>Day of Week</b> | <b>Dose (g) TID</b> | <b>Total Daily Dose<br/>(g)</b> | <b>Deviation from<br/>Scheduled Dose</b> |
|-------------|------------|-----------------------------|--------------------|---------------------|---------------------------------|------------------------------------------|
| 1           | 1          | 1                           | Sunday             | 2                   | 6                               |                                          |
| 1           | 2          | 2                           | Monday             | 3.3                 | 10                              |                                          |
| 1           | 3          | 3                           | Tuesday            | 4.7                 | 14                              |                                          |
| 1           | 4          | 4                           | Wednesday          | 6                   | 18                              |                                          |
| 1           | 5          | 5                           | Thursday           | 7.3                 | 22                              |                                          |
| 1           | 6          | 6                           | Friday             | 8.7                 | 26                              |                                          |
| 1           | 7          | 7                           | Saturday           | 10                  | 30                              |                                          |
| 2           | 1          | 8                           | Sunday             | 11.3                | 34                              |                                          |
| 2           | 2          | 9                           | Monday             | 12.7                | 38                              |                                          |
| 2           | 3          | 10                          | Tuesday            | 14                  | 42                              |                                          |
| 2           | 4          | 11                          | Wednesday          | 15.3                | 46                              |                                          |
| 2           | 5          | 12                          | Thursday           | 16.7                | 50                              |                                          |
| 2           | 6          | 13                          | Friday             | 18                  | 54                              |                                          |
| 2           | 7          | 14                          | Saturday           | 19.3                | 58                              |                                          |
| 3           | 1          | 15                          | Sunday             | 20.7                | 62                              |                                          |
| 3           | 2          | 16                          | Monday             | 22                  | 66                              |                                          |
| 3           | 3          | 17                          | Tuesday            | 23.3                | 70                              |                                          |
| 3           | 4          | 18                          | Wednesday          | 23.9                | 71.6                            |                                          |
| 3           | 5          | 19                          | Thursday           | 23.9                | 71.6                            |                                          |
| 3           | 6          | 20                          | Friday             | 23.9                | 71.6                            |                                          |
| 3           | 7          | 21                          | Saturday           | 23.9                | 71.6                            |                                          |
| 4           | 1          | 22                          | Sunday             | 23.9                | 71.6                            |                                          |
| 4           | 2          | 23                          | Monday             | 23.3                | 71.6                            |                                          |

**Table S3: Open-Label Exposure to Glycine – Subject 5459: Actual Titration**

| Week | Day | Day<br>(cumulative) | Day of Week | Dose (g) TID | Total Daily Dose<br>(g)    | Deviation from<br>Scheduled Dose                                                                      |
|------|-----|---------------------|-------------|--------------|----------------------------|-------------------------------------------------------------------------------------------------------|
| 4    | 3   | 24                  | Tuesday     | 23.9         | 71.6                       |                                                                                                       |
| 4    | 4   | 25                  | Wednesday   | 23.9         | 71.6                       |                                                                                                       |
| 4    | 5   | 26                  | Thursday    | 23.9         | 23.9/22; total of<br>45.9g | Lunch dose held due to<br>nausea; dinner dose<br>reduced to 22 g                                      |
| 4    | 6   | 27                  | Friday      | 20.7         | 62                         | Nausea after dinner dose<br>on day 5 of week 4; dose<br>lowered to 20.7 g TID as of<br>breakfast dose |
| 4    | 7   | 28                  | Saturday    | 20.7         | 62                         |                                                                                                       |
| 5    | 1   | 29                  | Sunday      | 20.7         | 62                         |                                                                                                       |
| 5    | 2   | 30                  | Monday      | 20.7         | 62                         |                                                                                                       |
| 5    | 3   | 31                  | Tuesday     | 20.7         | 62                         |                                                                                                       |
| 5    | 4   | 32                  | Wednesday   | 20.7         | 62                         |                                                                                                       |
| 5    | 5   | 33                  | Thursday    | 20.7         | 62                         |                                                                                                       |
| 5    | 6   | 34                  | Friday      | 20.7         | 41.3                       | 1 missed dose                                                                                         |
| 5    | 7   | 35                  | Saturday    | 20.7         | 62                         |                                                                                                       |
| 6    | 1   | 36                  | Sunday      | 20.7         | 62                         |                                                                                                       |
| 6    | 2   | 37                  | Monday      | 20.7         | 62                         |                                                                                                       |
| 6    | 3   | 38                  | Tuesday     | 20.7         | 62                         |                                                                                                       |
| 6    | 4   | 39                  | Wednesday   | 20.7         | 62                         |                                                                                                       |
| 6    | 5   | 40                  | Thursday    | 20.7         | 62                         |                                                                                                       |
| 6    | 6   | 41                  | Friday      | 20.7x2; 23.9 | 65.3                       | forgot to reduce lunch dose                                                                           |
| 6    | 7   | 42                  | Saturday    | 20.7         | 62                         |                                                                                                       |

**Table S4: Double-Blind Exposure to Placebo - Subject 3363: Actual Titration**

| Week | Day | Day<br>(cumulative) | Day of Week | Dose (g) TID | Total Daily Dose<br>(g) | Deviation from<br>Scheduled Dose |
|------|-----|---------------------|-------------|--------------|-------------------------|----------------------------------|
| 1    | 1   | 1                   | Sunday      | 2            | 6                       |                                  |
| 1    | 2   | 2                   | Monday      | 3            | 9                       |                                  |
| 1    | 3   | 3                   | Tuesday     | 4            | 12                      |                                  |
| 1    | 4   | 4                   | Wednesday   | 5            | 15                      |                                  |
| 1    | 5   | 5                   | Thursday    | 6            | 18                      |                                  |
| 1    | 6   | 6                   | Friday      | 7            | 21                      |                                  |
| 1    | 7   | 7                   | Saturday    | 8            | 24                      |                                  |
| 2    | 1   | 8                   | Sunday      | 9            | 27                      |                                  |
| 2    | 2   | 9                   | Monday      | 10           | 30                      |                                  |
| 2    | 3   | 10                  | Tuesday     | 12           | 36                      |                                  |
| 2    | 4   | 11                  | Wednesday   | 14           | 42                      |                                  |
| 2    | 5   | 12                  | Thursday    | 16           | 48                      |                                  |
| 2    | 6   | 13                  | Friday      | 18           | 54                      |                                  |
| 2    | 7   | 14                  | Saturday    | 20           | 60                      |                                  |
| 3    | 1   | 15                  | Sunday      | 22           | 66                      |                                  |
| 3    | 2   | 16                  | Monday      | 24           | 72                      |                                  |
| 3    | 3   | 17                  | Tuesday     | 26           | 78                      |                                  |
| 3    | 4   | 18                  | Wednesday   | 27.7         | 83                      |                                  |
| 3    | 5   | 19                  | Thursday    | 27.7         | 83                      |                                  |
| 3    | 6   | 20                  | Friday      | 27.7         | 83                      |                                  |
| 3    | 7   | 21                  | Saturday    | 27.7         | 83                      |                                  |
| 4    | 1   | 22                  | Sunday      | 27.7         | 83                      |                                  |
| 4    | 2   | 23                  | Monday      | 27.7         | 83                      |                                  |

**Table S4: Double-Blind Exposure to Placebo - Subject 3363: Actual Titration**

| Week | Day | Day<br>(cumulative) | Day of Week | Dose (g) TID | Total Daily Dose<br>(g) | Deviation from<br>Scheduled Dose |
|------|-----|---------------------|-------------|--------------|-------------------------|----------------------------------|
| 4    | 3   | 24                  | Tuesday     | 27.7         | 83                      |                                  |
| 4    | 4   | 25                  | Wednesday   | 27.7         | 83                      |                                  |
| 4    | 5   | 26                  | Thursday    | 27.7         | 83                      |                                  |
| 4    | 6   | 27                  | Friday      | 27.7         | 83                      |                                  |
| 4    | 7   | 28                  | Saturday    | 27.7         | 83                      |                                  |
| 5    | 1   | 29                  | Sunday      | 27.7         | 83                      |                                  |
| 5    | 2   | 30                  | Monday      | 27.7         | 83                      |                                  |
| 5    | 3   | 31                  | Tuesday     | 27.7         | 83                      |                                  |
| 5    | 4   | 32                  | Wednesday   | 27.7         | 83                      |                                  |
| 5    | 5   | 33                  | Thursday    | 27.7         | 83                      |                                  |
| 5    | 6   | 34                  | Friday      | 27.7         | 83                      |                                  |
| 5    | 7   | 35                  | Saturday    | 27.7         | 83                      |                                  |
| 6    | 1   | 36                  | Sunday      | 27.7         | 83                      |                                  |
| 6    | 2   | 37                  | Monday      | 27.7         | 83                      |                                  |
| 6    | 3   | 38                  | Tuesday     | 27.7         | 83                      |                                  |
| 6    | 4   | 39                  | Wednesday   | 27.7         | 83                      |                                  |
| 6    | 5   | 40                  | Thursday    | 27.7         | 83                      |                                  |
| 6    | 6   | 41                  | Friday      | 27.7         | 83                      |                                  |
| 6    | 7   | 42                  | Saturday    | 27.7         | 83                      |                                  |

**Table S5: Double-Blind Exposure to Glycine - Subject 3363: Actual Titration**

| Week | Day | Day<br>(cumulative) | Day of Week | Dose (g) TID | Total Daily Dose<br>(g) | Deviation from<br>Scheduled Dose                                                                                                                            |
|------|-----|---------------------|-------------|--------------|-------------------------|-------------------------------------------------------------------------------------------------------------------------------------------------------------|
| 1    | 1   | 1                   | Sunday      | 2            | 6                       |                                                                                                                                                             |
| 1    | 2   | 2                   | Monday      | 3            | 9                       |                                                                                                                                                             |
| 1    | 3   | 3                   | Tuesday     | 4            | 12                      |                                                                                                                                                             |
| 1    | 4   | 4                   | Wednesday   | 5            | 15                      |                                                                                                                                                             |
| 1    | 5   | 5                   | Thursday    | 6            | 18                      |                                                                                                                                                             |
| 1    | 6   | 6                   | Friday      | 7            | 21                      |                                                                                                                                                             |
| 1    | 7   | 7                   | Saturday    | 8            | 24                      |                                                                                                                                                             |
| 2    | 1   | 8                   | Sunday      | 9            | 27                      |                                                                                                                                                             |
| 2    | 2   | 9                   | Monday      | 10           | 30                      |                                                                                                                                                             |
| 2    | 3   | 10                  | Tuesday     | 12           | 36                      |                                                                                                                                                             |
| 2    | 4   | 11                  | Wednesday   | 14           | 42                      |                                                                                                                                                             |
| 2    | 5   | 12                  | Thursday    | 16           | 48                      |                                                                                                                                                             |
| 2    | 6   | 13                  | Friday      | 18           | 36                      | Vomited lunch dose                                                                                                                                          |
| 2    | 7   | 14                  | Saturday    | 20           | 60                      |                                                                                                                                                             |
| 3    | 1   | 15                  | Sunday      | 22           | 66                      |                                                                                                                                                             |
| 3    | 2   | 16                  | Monday      | 24           | 72                      |                                                                                                                                                             |
| 3    | 3   | 17                  | Tuesday     | 26.5         | 79.6                    |                                                                                                                                                             |
| 3    | 4   | 18                  | Wednesday   | 26.5         | 79.6                    |                                                                                                                                                             |
| 3    | 5   | 19                  | Thursday    | 26.5/20      | 46.5*                   | 26.5 breakfast; subject skipped lunch dose as instructed because of concern about possible exacerbation of psychotic symptoms; dinner dose reduced to 20 g* |

**Table S5: Double-Blind Exposure to Glycine - Subject 3363: Actual Titration**

| Week | Day | Day<br>(cumulative) | Day of Week | Dose (g) TID | Total Daily Dose<br>(g) | Deviation from<br>Scheduled Dose                                  |
|------|-----|---------------------|-------------|--------------|-------------------------|-------------------------------------------------------------------|
| 3    | 6   | 20                  | Friday      | 20           | 60                      |                                                                   |
| 3    | 7   | 21                  | Saturday    | 20           | 60                      |                                                                   |
| 4    | 1   | 22                  | Sunday      | 20           | 60                      |                                                                   |
| 4    | 2   | 23                  | Monday      | 20           | 60                      |                                                                   |
| 4    | 3   | 24                  | Tuesday     | 22           | 66                      |                                                                   |
| 4    | 4   | 25                  | Wednesday   | 22           | 66                      |                                                                   |
| 4    | 5   | 26                  | Thursday    | 24           | 72                      |                                                                   |
| 4    | 6   | 27                  | Friday      | 24           | 72                      |                                                                   |
| 4    | 7   | 28                  | Saturday    | 26.5         | 79.6                    |                                                                   |
| 5    | 1   | 29                  | Sunday      | 26.5         | 79.6                    |                                                                   |
| 5    | 2   | 30                  | Monday      | 26.5/24      | 24                      | Vomited after breakfast<br>dose; held lunch; dinner<br>24 g total |
| 5    | 3   | 31                  | Tuesday     | 24           | 72                      |                                                                   |
| 5    | 4   | 32                  | Wednesday   | 24           | 72                      |                                                                   |
| 5    | 5   | 33                  | Thursday    | 24 BID; 26.5 | 74.5                    |                                                                   |
| 5    | 6   | 34                  | Friday      | 24 BID; 26.5 | 48                      | Vomited after dinner<br>dose; 48 g total                          |
| 5    | 7   | 35                  | Saturday    | 24 TID       | 72                      |                                                                   |
| 6    | 1   | 36                  | Sunday      | 24 TID       | 72                      |                                                                   |
| 6    | 2   | 37                  | Monday      | 24 TID       | 72                      |                                                                   |
| 6    | 3   | 38                  | Tuesday     | 24 TID       | 72                      |                                                                   |
| 6    | 4   | 39                  | Wednesday   | 24 TID       | 72                      |                                                                   |
| 6    | 5   | 40                  | Thursday    | 24 BID/22    | 46                      | Vomited after lunch dose                                          |

**Table S5: Double-Blind Exposure to Glycine - Subject 3363: Actual Titration**

| <b>Week</b> | <b>Day</b> | <b>Day<br/>(cumulative)</b> | <b>Day of Week</b> | <b>Dose (g) TID</b> | <b>Total Daily Dose<br/>(g)</b> | <b>Deviation from<br/>Scheduled Dose</b> |
|-------------|------------|-----------------------------|--------------------|---------------------|---------------------------------|------------------------------------------|
| 6           | 6          | 41                          | Friday             | 22 TID              | 66                              |                                          |
| 6           | 7          | 42                          | Saturday           | 22 TID              | 66                              |                                          |

\* dose reduced because a family member thought subject was becoming more psychotic.



**Table S6: Open-Label Exposure to Glycine - Subject 3363: Actual Titration**

| Week | Day | Day<br>(cumulative) | Day of Week | Dose (g) TID | Total Daily Dose<br>(g) | Deviation from<br>Scheduled Dose                   |
|------|-----|---------------------|-------------|--------------|-------------------------|----------------------------------------------------|
| 1    | 1   | 1                   | Sunday      | 2            | 6                       |                                                    |
| 1    | 2   | 2                   | Monday      | 3.3          | 10                      |                                                    |
| 1    | 3   | 3                   | Tuesday     | 4.7          | 14                      |                                                    |
| 1    | 4   | 4                   | Wednesday   | 6            | 18                      |                                                    |
| 1    | 5   | 5                   | Thursday    | 7.3          | 22                      |                                                    |
| 1    | 6   | 6                   | Friday      | 8.7          | 26                      |                                                    |
| 1    | 7   | 7                   | Saturday    | 10           | 30                      |                                                    |
| 2    | 1   | 8                   | Sunday      | 11.3         | 34                      |                                                    |
| 2    | 2   | 9                   | Monday      | 12.7         | 38                      |                                                    |
| 2    | 3   | 10                  | Tuesday     | 14           | 42                      |                                                    |
| 2    | 4   | 11                  | Wednesday   | 15.3         | 46                      |                                                    |
| 2    | 5   | 12                  | Thursday    | 16.7         | 50                      |                                                    |
| 2    | 6   | 13                  | Friday      | 18           | 54                      |                                                    |
| 2    | 7   | 14                  | Saturday    | 19.3         | 58                      |                                                    |
| 3    | 1   | 15                  | Sunday      | 20.7         | 62                      |                                                    |
| 3    | 2   | 16                  | Monday      | 22           | 66                      |                                                    |
| 3    | 3   | 17                  | Tuesday     | 23.3         | 70                      |                                                    |
| 3    | 4   | 18                  | Wednesday   | 24.7         | 74                      |                                                    |
| 3    | 5   | 19                  | Thursday    | 26           | 78/52                   | Vomited after<br>dinner dose – total<br>intake 52g |
| 3    | 6   | 20                  | Friday      | 27.3         | 81.8                    |                                                    |
| 3    | 7   | 21                  | Saturday    | 27.3         | 81.8                    | Nausea after dinner<br>dose                        |

**Table S6: Open-Label Exposure to Glycine - Subject 3363: Actual Titration**

| Week | Day | Day<br>(cumulative) | Day of Week | Dose (g) TID | Total Daily Dose<br>(g) | Deviation from<br>Scheduled Dose                    |
|------|-----|---------------------|-------------|--------------|-------------------------|-----------------------------------------------------|
| 4    | 1   | 22                  | Sunday      | 27.3         | 66                      | Dose reduced to 22<br>g TID as of<br>breakfast dose |
| 4    | 2   | 23                  | Monday      | 22           | 66                      |                                                     |
| 4    | 3   | 24                  | Tuesday     | 22           | 66                      |                                                     |
| 4    | 4   | 25                  | Wednesday   | 22           | 66                      |                                                     |
| 4    | 5   | 26                  | Thursday    | 22           | 66                      |                                                     |
| 4    | 6   | 27                  | Friday      | 22           | 66                      |                                                     |
| 4    | 7   | 28                  | Saturday    | 22           | 66                      |                                                     |
| 5    | 1   | 29                  | Sunday      | 22           | 66                      |                                                     |
| 5    | 2   | 30                  | Monday      | 22           | 66                      |                                                     |
| 5    | 3   | 31                  | Tuesday     | 22           | 66                      |                                                     |
| 5    | 4   | 32                  | Wednesday   | 22           | 66                      |                                                     |
| 5    | 5   | 33                  | Thursday    | 22           | 66                      |                                                     |
| 5    | 6   | 34                  | Friday      | 22           | 66                      |                                                     |
| 5    | 7   | 35                  | Saturday    | 22           | 66                      |                                                     |
| 6    | 1   | 36                  | Sunday      | 22           | 66                      |                                                     |
| 6    | 2   | 37                  | Monday      | 22           | 66                      |                                                     |
| 6    | 3   | 38                  | Tuesday     | 22           | 66                      |                                                     |
| 6    | 4   | 39                  | Wednesday   | 22           | 66                      |                                                     |
| 6    | 5   | 40                  | Thursday    | 22           | 66                      |                                                     |
| 6    | 6   | 41                  | Friday      | 22           | 66                      |                                                     |
| 6    | 7   | 42                  | Saturday    | 22           | 66                      |                                                     |

**Table S7. Open-Label Exposure to Chronic Glycine - Subject 3363: Actual Titration**

| Week | Day | Day<br>(cumulative) | Day of Week | Dose (g)<br>TID | Total Daily Dose<br>(g) | Deviation from<br>Scheduled Dose |
|------|-----|---------------------|-------------|-----------------|-------------------------|----------------------------------|
| 1    | 1   | 1                   | Sunday      | 1.8             | 5.4                     |                                  |
| 1    | 2   | 2                   | Monday      | 3               | 9                       |                                  |
| 1    | 3   | 3                   | Tuesday     | 5               | 15                      |                                  |
| 1    | 4   | 4                   | Wednesday   | 6.1             | 18.3                    |                                  |
| 1    | 5   | 5                   | Thursday    | 6.8             | 20.4                    |                                  |
| 1    | 6   | 6                   | Friday      | 8               | 24                      |                                  |
| 1    | 7   | 7                   | Saturday    | 10              | 30                      |                                  |
| 2    | 1   | 8                   | Sunday      | 11.1            | 33.3                    |                                  |
| 2    | 2   | 9                   | Monday      | 11.8            | 35.4                    |                                  |
| 2    | 3   | 10                  | Tuesday     | 13              | 39                      |                                  |
| 2    | 4   | 11                  | Wednesday   | 14.1            | 42.3                    |                                  |
| 2    | 5   | 12                  | Thursday    | 15.4            | 46.2                    |                                  |
| 2    | 6   | 13                  | Friday      | 16              | 48                      |                                  |
| 2    | 7   | 14                  | Saturday    | 18              | 54                      |                                  |
| 3    | 1   | 15                  | Sunday      | 19.1            | 57.3                    |                                  |
| 3    | 2   | 16                  | Monday      | 19.8            | 59.4                    |                                  |
| 3    | 3   | 17                  | Tuesday     | 21              | 63                      |                                  |
| 3    | 4   | 18                  | Wednesday   | 21.6            | 64.8                    | 21.6 TID Nausea                  |
| 3    | 5   | 19                  | Thursday    | 18              | 54                      | Reduce dose to 18<br>TID         |
| 3    | 6   | 20                  | Friday      | 18              | 54                      |                                  |
| 3    | 7   | 21                  | Saturday    | 18              | 54                      |                                  |
| 4    | 1   | 22                  | Sunday      | 18              | 54                      |                                  |
| 4    | 2   | 23                  | Monday      | 18              | 54                      |                                  |

**Table S7. Open-Label Exposure to Chronic Glycine - Subject 3363: Actual Titration**

| Week | Day | Day<br>(cumulative) | Day of Week | Dose (g)<br>TID | Total Daily Dose<br>(g) | Deviation from<br>Scheduled Dose      |
|------|-----|---------------------|-------------|-----------------|-------------------------|---------------------------------------|
| 4    | 3   | 24                  | Tuesday     | 18              | 36                      | 18 BID – threw up<br>at HS - migraine |
| 4    | 4   | 25                  | Wednesday   | 18              | 36                      | 18 BID – skipped<br>breakfast dose    |
| 4    | 5   | 26                  | Thursday    | 18              | 54                      |                                       |
| 4    | 6   | 27                  | Friday      | 18              | 54                      |                                       |
| 4    | 7   | 28                  | Saturday    | 18              | 54                      |                                       |
| 5    | 1   | 29                  | Sunday      | 18              | 54                      |                                       |
| 5    | 2   | 30                  | Monday      | 18              | 36                      | Missed dinner dose                    |
| 5    | 3   | 31                  | Tuesday     | 18              | 54                      |                                       |
| 5    | 4   | 32                  | Wednesday   | 18              | 54                      |                                       |
| 5    | 5   | 33                  | Thursday    | 18              | 54                      |                                       |
| 5    | 6   | 34                  | Friday      | 18              | 36                      | Missed dinner dose                    |
| 5    | 7   | 35                  | Saturday    | 18              | 54                      |                                       |
| 6    | 1   | 36                  | Sunday      | 18              | 36                      | Missed dinner dose                    |
| 6    | 2   | 37                  | Monday      | 18              | 54                      |                                       |
| 6    | 3   | 38                  | Tuesday     | 18              | 36                      | Missed dinner dose                    |
| 6    | 4   | 39                  | Wednesday   | 18              | 36                      | Missed dinner dose                    |
| 6    | 5   | 40                  | Thursday    | 18              | 54                      |                                       |
| 6    | 6   | 41                  | Friday      | 18              | 54                      |                                       |
| 6    | 7   | 42                  | Saturday    | 18              | 54                      |                                       |
| 7    | 1   | 43                  | Sunday      | 18              | 36                      | Missed dinner dose                    |
| 7    | 2   | 44                  | Monday      | 18              | 54                      |                                       |
| 7    | 3   | 45                  | Tuesday     | 18              | 54                      |                                       |

**Table S7. Open-Label Exposure to Chronic Glycine - Subject 3363: Actual Titration**

| Week | Day | Day<br>(cumulative) | Day of Week | Dose (g)<br>TID | Total Daily Dose<br>(g) | Deviation from<br>Scheduled Dose |
|------|-----|---------------------|-------------|-----------------|-------------------------|----------------------------------|
| 7    | 4   | 46                  | Wednesday   | 18              | 54                      |                                  |
| 7    | 5   | 47                  | Thursday    | 18              | 36                      | Missed dinner dose               |
| 7    | 6   | 48                  | Friday      | 18              | 54                      |                                  |
| 7    | 7   | 49                  | Saturday    | 18              | 54                      |                                  |
| 8    | 1   | 50                  | Sunday      | 18              | 54                      |                                  |
| 8    | 2   | 51                  | Monday      | 18              | 54                      |                                  |
| 8    | 3   | 52                  | Tuesday     | 18              | 54                      |                                  |
| 8    | 4   | 53                  | Wednesday   | 18              | 36                      | Missed dinner dose               |
| 8    | 5   | 54                  | Thursday    | 18              | 54                      |                                  |
| 8    | 6   | 55                  | Friday      | 18              | 54                      |                                  |
| 8    | 7   | 56                  | Saturday    | 18              | 54                      |                                  |
| 9    | 1   | 57                  | Sunday      | 18              | 54                      |                                  |
| 9    | 2   | 58                  | Monday      | 18              | 54                      |                                  |
| 9    | 3   | 59                  | Tuesday     | 18              | 36                      | Missed dinner dose               |
| 9    | 4   | 60                  | Wednesday   | 18              | 54                      |                                  |
| 9    | 5   | 61                  | Thursday    | 18              | 54                      |                                  |
| 9    | 6   | 62                  | Friday      | 18              | 54                      |                                  |
| 9    | 7   | 63                  | Saturday    | 18              | 54                      |                                  |
| 10   | 1   | 64                  | Sunday      | 18              | 54                      |                                  |
| 10   | 2   | 65                  | Monday      | 18              | 54                      |                                  |
| 10   | 3   | 66                  | Tuesday     | 18              | 54                      |                                  |
| 10   | 4   | 67                  | Wednesday   | 18              | 54                      |                                  |
| 10   | 5   | 68                  | Thursday    | 18              | 54                      |                                  |

**Table S7. Open-Label Exposure to Chronic Glycine - Subject 3363: Actual Titration**

| <b>Week</b> | <b>Day</b> | <b>Day<br/>(cumulative)</b> | <b>Day of Week</b> | <b>Dose (g)<br/>TID</b> | <b>Total Daily Dose<br/>(g)</b> | <b>Deviation from<br/>Scheduled Dose</b> |
|-------------|------------|-----------------------------|--------------------|-------------------------|---------------------------------|------------------------------------------|
| 10          | 6          | 69                          | Friday             | 18                      | 54                              |                                          |
| 10          | 7          | 70                          | Saturday           | 18                      | 36                              | Missed dinner dose                       |
| 11          | 1          | 71                          | Sunday             | 18                      | 54                              |                                          |
| 11          | 2          | 72                          | Monday             | 18                      | 36                              | Missed lunch dose                        |
| 11          | 3          | 73                          | Tuesday            | 18                      | 27                              | Missed lunch and<br>half of dinner       |
| 11          | 4          | 74                          | Wednesday          | 18                      | 36                              | Missed dinner dose                       |
| 11          | 5          | 75                          | Thursday           | 18                      | 54                              |                                          |
| 11          | 6          | 76                          | Friday             | 18                      | 54                              |                                          |
| 11          | 7          | 77                          | Saturday           | 18                      | 36                              | Missed dinner dose                       |
| 12          | 1          | 78                          | Sunday             | 18                      | 54                              |                                          |
| 12          | 2          | 79                          | Monday             | 18                      | 54                              |                                          |
| 12          | 3          | 80                          | Tuesday            | 18                      | 36                              | Missed dinner dose                       |
| 12          | 4          | 81                          | Wednesday          | 18                      | 54                              |                                          |
| 12          | 5          | 82                          | Thursday           | 18                      | 54                              |                                          |
| 12          | 6          | 83                          | Friday             | 18                      | 54                              |                                          |
| 12          | 7          | 84                          | Saturday           | 18                      | 54                              |                                          |
| 13          | 1          | 85                          | Sunday             | 18                      | 54                              |                                          |
| 13          | 2          | 86                          | Monday             | 18                      | 54                              |                                          |
| 13          | 3          | 87                          | Tuesday            | 18                      | 36                              | Missed lunch dose                        |
| 13          | 4          | 88                          | Wednesday          | 18                      | 54                              |                                          |
| 13          | 5          | 89                          | Thursday           | 18                      | 54                              |                                          |
| 13          | 6          | 90                          | Friday             | 18                      | 54                              |                                          |
| 13          | 7          | 91                          | Saturday           | 18                      | 36                              | Missed dinner dose                       |

**Table S7. Open-Label Exposure to Chronic Glycine - Subject 3363: Actual Titration**

| <b>Week</b> | <b>Day</b> | <b>Day<br/>(cumulative)</b> | <b>Day of Week</b> | <b>Dose (g)<br/>TID</b> | <b>Total Daily Dose<br/>(g)</b> | <b>Deviation from<br/>Scheduled Dose</b> |
|-------------|------------|-----------------------------|--------------------|-------------------------|---------------------------------|------------------------------------------|
| 14          | 1          | 92                          | Sunday             | 18                      | 36                              | Missed lunch dose                        |
| 14          | 2          | 93                          | Monday             | 18                      | 54                              |                                          |
| 14          | 3          | 94                          | Tuesday            | 18                      | 54                              |                                          |
| 14          | 4          | 95                          | Wednesday          | 18                      | 36                              | Missed lunch dose                        |
| 14          | 5          | 96                          | Thursday           | 18                      | 36                              | Missed lunch dose                        |
| 14          | 6          | 97                          | Friday             | 18                      | 54                              |                                          |
| 14          | 7          | 98                          | Saturday           | 18                      | 36                              | Missed lunch dose                        |
| 15          | 1          | 99                          | Sunday             | 18                      | 36                              | Missed dinner dose                       |
| 15          | 2          | 100                         | Monday             | 18                      | 36                              | Missed dinner dose                       |
| 15          | 3          | 101                         | Tuesday            | 18                      | 36                              | Missed dinner dose                       |
| 15          | 4          | 102                         | Wednesday          | 18                      | 36                              | Missed breakfast<br>dose                 |
| 15          | 5          | 103                         | Thursday           | 18                      | 36                              | Missed dinner dose                       |
| 15          | 6          | 104                         | Friday             | 18                      | 36                              | Missed dinner dose                       |
| 15          | 7          | 105                         | Saturday           | 18                      | 36                              | Missed dinner dose                       |
| 16          | 1          | 106                         | Sunday             | 18                      | 18                              | Missed lunch/dinner<br>doses             |
| 16          | 2          | 107                         | Monday             | 18                      | 18                              | Missed<br>breakfast/lunch<br>doses       |
| 16          | 3          | 108                         | Tuesday            | 0                       | 0                               | Missed all doses                         |
| 16          | 4          | 109                         | Wednesday          | 0                       | 0                               | Missed all doses                         |
| 16          | 5          | 110                         | Thursday           | 18                      | 18                              | Missed<br>breakfast/lunch<br>doses       |

**Table S7. Open-Label Exposure to Chronic Glycine - Subject 3363: Actual Titration**

| Week | Day | Day<br>(cumulative) | Day of Week | Dose (g)<br>TID | Total Daily Dose<br>(g) | Deviation from<br>Scheduled Dose    |
|------|-----|---------------------|-------------|-----------------|-------------------------|-------------------------------------|
| 16   | 6   | 111                 | Friday      | 18              | 18                      | Missed<br>breakfast/dinner<br>doses |
| 16   | 7   | 112                 | Saturday    | 0               | 0                       | Stopped                             |
| 17   | 1   | 113                 | Sunday      | 0               | 0                       | Stopped                             |
| 17   | 2   | 114                 | Monday      | 0               | 0                       | Stopped                             |
| 17   | 3   | 115                 | Tuesday     | 0               | 0                       | Stopped                             |
| 17   | 4   | 116                 | Wednesday   | 0               | 0                       | Stopped                             |
| 17   | 5   | 117                 | Thursday    | 0               | 0                       | Stopped                             |
| 17   | 6   | 118                 | Friday      | 0               | 0                       | Stopped                             |
| 17   | 7   | 119                 | Saturday    | 0               | 0                       | Stopped                             |
| 18   | 1   | 120                 | Sunday      | 0               | 0                       | Stopped                             |
| 18   | 2   | 121                 | Monday      | 0               | 0                       | Stopped                             |
| 18   | 3   | 122                 | Tuesday     | 0               | 0                       | Stopped                             |
| 18   | 4   | 123                 | Wednesday   | 0               | 0                       | Stopped                             |
| 18   | 5   | 124                 | Thursday    | 0               | 0                       | Stopped                             |
| 18   | 6   | 125                 | Friday      | 0               | 0                       | Stopped                             |
| 18   | 7   | 126                 | Saturday    | 0               | 0                       | Stopped                             |
| 19   | 1   | 127                 | Sunday      | 0               | 0                       | Stopped                             |
| 19   | 2   | 128                 | Monday      | 0               | 0                       | Stopped                             |
| 19   | 3   | 129                 | Tuesday     | 0               | 0                       | Stopped                             |
| 19   | 4   | 130                 | Wednesday   | 0               | 0                       | Stopped                             |
| 19   | 5   | 131                 | Thursday    | 0               | 0                       | Stopped                             |
| 19   | 6   | 132                 | Friday      | 0               | 0                       | Stopped                             |



**Table S7. Open-Label Exposure to Chronic Glycine - Subject 3363: Actual Titration**

| <b>Week</b> | <b>Day</b> | <b>Day<br/>(cumulative)</b> | <b>Day of Week</b> | <b>Dose (g)<br/>TID</b> | <b>Total Daily Dose<br/>(g)</b> | <b>Deviation from<br/>Scheduled Dose</b> |
|-------------|------------|-----------------------------|--------------------|-------------------------|---------------------------------|------------------------------------------|
| 19          | 7          | 133                         | Saturday           | 0                       | 0                               | Stopped                                  |
| 20          | 1          | 134                         | Sunday             | 0                       | 0                               | Stopped                                  |
| 20          | 2          | 135                         | Monday             | 0                       | 0                               | Stopped                                  |
| 20          | 3          | 136                         | Tuesday            | 0                       | 0                               | Stopped                                  |
| 20          | 4          | 137                         | Wednesday          | 0                       | 0                               | Stopped                                  |
| 20          | 5          | 138                         | Thursday           | 0                       | 0                               | Stopped                                  |
| 20          | 6          | 139                         | Friday             | 0                       | 0                               | Stopped                                  |
| 20          | 7          | 140                         | Saturday           | 0                       | 0                               | Stopped                                  |
| 21          | 1          | 141                         | Sunday             | 0                       | 0                               | Stopped                                  |
| 21          | 2          | 142                         | Monday             | 0                       | 0                               | Stopped                                  |
| 21          | 3          | 143                         | Tuesday            | 0                       | 0                               | Stopped                                  |
| 21          | 4          | 144                         | Wednesday          | 0                       | 0                               | Stopped                                  |
| 21          | 5          | 145                         | Thursday           | 0                       | 0                               | Stopped                                  |
| 21          | 6          | 146                         | Friday             | 0                       | 0                               | Stopped                                  |
| 21          | 7          | 147                         | Saturday           | 0                       | 0                               | Stopped                                  |
| 22          | 1          | 148                         | Sunday             | 0                       | 0                               | Stopped                                  |
| 22          | 2          | 149                         | Monday             | 0                       | 0                               | Stopped                                  |
| 22          | 3          | 150                         | Tuesday            | 0                       | 0                               | Stopped                                  |
| 22          | 4          | 151                         | Wednesday          | 0                       | 0                               | Stopped                                  |
| 22          | 5          | 152                         | Thursday           | 0                       | 0                               | Stopped                                  |
| 22          | 6          | 153                         | Friday             | 0                       | 0                               | Stopped                                  |
| 22          | 7          | 154                         | Saturday           | 0                       | 0                               | Stopped                                  |
| 23          | 1          | 155                         | Sunday             | 0                       | 0                               | Stopped                                  |

**Table S7. Open-Label Exposure to Chronic Glycine - Subject 3363: Actual Titration**

| Week | Day | Day<br>(cumulative) | Day of Week | Dose (g)<br>TID | Total Daily Dose<br>(g) | Deviation from<br>Scheduled Dose |
|------|-----|---------------------|-------------|-----------------|-------------------------|----------------------------------|
| 23   | 2   | 156                 | Monday      | 0               | 0                       | Stopped                          |
| 23   | 3   | 157                 | Tuesday     | 0               | 0                       | Stopped                          |
| 23   | 4   | 158                 | Wednesday   | 0               | 0                       | Stopped                          |
| 23   | 5   | 159                 | Thursday    | 0               | 0                       | Stopped                          |
| 23   | 6   | 160                 | Friday      | 0               | 0                       | Stopped                          |
| 23   | 7   | 161                 | Saturday    | 0               | 0                       | Stopped                          |
| 24   | 1   | 162                 | Sunday      | 0               | 0                       | Stopped                          |
| 24   | 2   | 163                 | Monday      | 0               | 0                       | Stopped                          |
| 24   | 3   | 164                 | Tuesday     | 0               | 0                       | Stopped                          |
| 24   | 4   | 165                 | Wednesday   | 0               | 0                       | Stopped                          |
| 24   | 5   | 166                 | Thursday    | 0               | 0                       | Stopped                          |
| 24   | 6   | 167                 | Friday      | 0               | 0                       | Stopped                          |
| 24   | 7   | 168                 | Saturday    | 0               | 0                       | Stopped                          |
| 25   | 1   | 169                 | Sunday      | 0               | 0                       | Stopped                          |
| 25   | 2   | 170                 | Monday      | 0               | 0                       | Stopped                          |
| 25   | 3   | 171                 | Tuesday     | 0               | 0                       | Stopped                          |
| 25   | 4   | 172                 | Wednesday   | 0               | 0                       | Stopped                          |
| 25   | 5   | 173                 | Thursday    | 0               | 0                       | Stopped                          |
| 25   | 6   | 174                 | Friday      | 0               | 0                       | Stopped                          |
| 25   | 7   | 175                 | Saturday    | 0               | 0                       | Stopped                          |
| 26   | 1   | 176                 | Sunday      | 0               | 0                       | Stopped                          |
| 26   | 2   | 177                 | Monday      | 1.8             | 3.6                     | Restarts                         |
| 26   | 3   | 178                 | Tuesday     | 3               | 9                       |                                  |

**Table S7. Open-Label Exposure to Chronic Glycine - Subject 3363: Actual Titration**

| <b>Week</b> | <b>Day</b> | <b>Day<br/>(cumulative)</b> | <b>Day of Week</b> | <b>Dose (g)<br/>TID</b> | <b>Total Daily Dose<br/>(g)</b> | <b>Deviation from<br/>Scheduled Dose</b> |
|-------------|------------|-----------------------------|--------------------|-------------------------|---------------------------------|------------------------------------------|
| 26          | 4          | 179                         | Wednesday          | 5                       | 10                              | Missed dinner dose                       |
| 26          | 5          | 180                         | Thursday           | 5                       | 15                              |                                          |
| 26          | 6          | 181                         | Friday             | 5                       | 15                              |                                          |
| 26          | 7          | 182                         | Saturday           | 5                       | 15                              |                                          |
| 27          | 1          | 183                         | Sunday             | 10                      | 30                              |                                          |
| 27          | 2          | 184                         | Monday             | 10                      | 30                              |                                          |
| 27          | 3          | 185                         | Tuesday            | 10                      | 30                              |                                          |
| 27          | 4          | 186                         | Wednesday          | 10                      | 30                              |                                          |
| 27          | 5          | 187                         | Thursday           | 13                      | 39                              |                                          |
| 27          | 6          | 188                         | Friday             | 13                      | 39                              |                                          |
| 27          | 7          | 189                         | Saturday           | 13                      | 39                              |                                          |
| 28          | 1          | 190                         | Sunday             | 13                      | 39                              |                                          |
| 28          | 2          | 191                         | Monday             | 13                      | 39                              |                                          |
| 28          | 3          | 192                         | Tuesday            | 13                      | 39                              |                                          |
| 28          | 4          | 193                         | Wednesday          | 13                      | 39                              |                                          |
| 28          | 5          | 194                         | Thursday           | 13                      | 39                              |                                          |
| 28          | 6          | 195                         | Friday             | 13                      | 39                              |                                          |
| 28          | 7          | 196                         | Saturday           | 13                      | 39                              |                                          |
| 29          | 1          | 197                         | Sunday             | 13                      | 39                              |                                          |
| 29          | 2          | 198                         | Monday             | 13                      | 39                              |                                          |
| 29          | 3          | 199                         | Tuesday            | 13                      | 39                              |                                          |
| 29          | 4          | 200                         | Wednesday          | 13                      | 39                              |                                          |
| 29          | 5          | 201                         | Thursday           | 13                      | 39                              |                                          |

**Table S7. Open-Label Exposure to Chronic Glycine - Subject 3363: Actual Titration**

| <b>Week</b> | <b>Day</b> | <b>Day<br/>(cumulative)</b> | <b>Day of Week</b> | <b>Dose (g)<br/>TID</b> | <b>Total Daily Dose<br/>(g)</b> | <b>Deviation from<br/>Scheduled Dose</b> |
|-------------|------------|-----------------------------|--------------------|-------------------------|---------------------------------|------------------------------------------|
| 29          | 6          | 202                         | Friday             | 13                      | 39                              |                                          |
| 29          | 7          | 203                         | Saturday           | 13                      | 26                              | Missed dinner dose                       |
| 30          | 1          | 204                         | Sunday             | 13                      | 39                              |                                          |
| 30          | 2          | 205                         | Monday             | 13                      | 39                              |                                          |
| 30          | 3          | 206                         | Tuesday            | 13                      | 39                              |                                          |
| 30          | 4          | 207                         | Wednesday          | 13                      | 39                              |                                          |
| 30          | 5          | 208                         | Thursday           | 13                      | 39                              |                                          |
| 30          | 6          | 209                         | Friday             | 13                      | 39                              |                                          |
| 30          | 7          | 210                         | Saturday           | 13                      | 26                              | Missed dinner dose                       |
| 31          | 1          | 211                         | Sunday             | 13                      | 39                              |                                          |
| 31          | 2          | 212                         | Monday             | 13                      | 39                              |                                          |
| 31          | 3          | 213                         | Tuesday            | 14.1                    | 42.3                            |                                          |
| 31          | 4          | 214                         | Wednesday          | 13                      | 39                              |                                          |
| 31          | 5          | 215                         | Thursday           | 0                       | 0                               | Missed all doses                         |
| 31          | 6          | 216                         | Friday             | 0                       | 0                               | Missed all doses                         |
| 31          | 7          | 217                         | Saturday           | 0                       | 0                               | Missed all doses                         |
| 32          | 1          | 218                         | Sunday             | 3                       | 9                               |                                          |
| 32          | 2          | 219                         | Monday             | 5                       | 15                              |                                          |
| 32          | 3          | 220                         | Tuesday            | 6.1                     | 18.3                            |                                          |
| 32          | 4          | 221                         | Wednesday          | 6.8                     | 20.4                            |                                          |
| 32          | 5          | 222                         | Thursday           | 10                      | 30                              |                                          |
| 32          | 6          | 223                         | Friday             | 10                      | 30                              |                                          |
| 32          | 7          | 224                         | Saturday           | 10                      | 30                              |                                          |

**Table S7. Open-Label Exposure to Chronic Glycine - Subject 3363: Actual Titration**

| Week | Day | Day<br>(cumulative) | Day of Week | Dose (g)<br>TID | Total Daily Dose<br>(g) | Deviation from<br>Scheduled Dose |
|------|-----|---------------------|-------------|-----------------|-------------------------|----------------------------------|
| 33   | 1   | 225                 | Sunday      | 10              | 20                      | Missed lunch dose                |
| 33   | 2   | 226                 | Monday      | 10              | 20                      | Missed dinner dose               |
| 33   | 3   | 227                 | Tuesday     | 10              | 20                      | Missed dinner dose               |
| 33   | 4   | 228                 | Wednesday   | 10              | 30                      |                                  |
| 33   | 5   | 229                 | Thursday    | 10              | 30                      |                                  |
| 33   | 6   | 230                 | Friday      | 10              | 30                      |                                  |
| 33   | 7   | 231                 | Saturday    | 10              | 30                      |                                  |
| 34   | 1   | 232                 | Sunday      | 10              | 20                      | Missed dinner dose               |
| 34   | 2   | 233                 | Monday      | 10              | 30                      |                                  |
| 34   | 3   | 234                 | Tuesday     | 10              | 30                      |                                  |
| 34   | 4   | 235                 | Wednesday   | 10              | 10                      | Missed lunch and<br>dinner doses |
| 34   | 5   | 236                 | Thursday    | 10              | 30                      |                                  |
| 34   | 6   | 237                 | Friday      | 0               | 0                       | Missed all doses                 |
| 34   | 7   | 238                 | Saturday    | 10              | 20                      | Missed lunch dose                |
| 35   | 1   | 239                 | Sunday      | 10              | 20                      | Missed dinner dose               |
| 35   | 2   | 240                 | Monday      | 10              | 20                      | Missed dinner dose               |
| 35   | 3   | 241                 | Tuesday     | 10              | 30                      |                                  |
| 35   | 4   | 242                 | Wednesday   | 10              | 20                      | Missed dinner dose               |
| 35   | 5   | 243                 | Thursday    | 10              | 30                      |                                  |
| 35   | 6   | 244                 | Friday      | 10              | 30                      |                                  |
| 35   | 7   | 245                 | Saturday    | 10              | 30                      |                                  |
| 36   | 1   | 246                 | Sunday      | 10              | 30                      |                                  |
| 36   | 2   | 247                 | Monday      | 10 BID + 5      | 25                      | Reduce dinner                    |

**Table S7. Open-Label Exposure to Chronic Glycine - Subject 3363: Actual Titration**

| Week | Day | Day<br>(cumulative) | Day of Week | Dose (g)<br>TID | Total Daily Dose<br>(g) | Deviation from<br>Scheduled Dose<br>dose to 5 g |
|------|-----|---------------------|-------------|-----------------|-------------------------|-------------------------------------------------|
| 36   | 3   | 248                 | Tuesday     | 10 BID + 5      | 25                      |                                                 |
| 36   | 4   | 249                 | Wednesday   | 10 BID + 5      | 25                      |                                                 |
| 36   | 5   | 250                 | Thursday    | 10 BID + 5      | 25                      |                                                 |
| 36   | 6   | 251                 | Friday      | 10 BID + 5      | 25                      |                                                 |
| 36   | 7   | 252                 | Saturday    | 10 BID + 5      | 25                      |                                                 |
| 37   | 1   | 253                 | Sunday      | 10 BID          | 20                      | Missed dinner dose                              |
| 37   | 2   | 254                 | Monday      | 10 BID          | 20                      | Missed dinner dose                              |
| 37   | 3   | 255                 | Tuesday     | 10 BID + 5      | 25                      |                                                 |
| 37   | 4   | 256                 | Wednesday   | 10 BID + 5      | 25                      |                                                 |
| 37   | 5   | 257                 | Thursday    | 10 BID + 5      | 25                      |                                                 |
| 37   | 6   | 258                 | Friday      | 10 BID + 5      | 25                      |                                                 |
| 37   | 7   | 259                 | Saturday    | 10 BID + 5      | 25                      |                                                 |
| 38   | 1   | 260                 | Sunday      | 10 BID + 5      | 25                      |                                                 |
| 38   | 2   | 261                 | Monday      | 10 BID + 5      | 25                      |                                                 |
| 38   | 3   | 262                 | Tuesday     | 10 BID + 5      | 25                      |                                                 |
| 38   | 4   | 263                 | Wednesday   | 10 BID + 5      | 25                      |                                                 |
| 38   | 5   | 264                 | Thursday    | 10 BID + 5      | 25                      |                                                 |
| 38   | 6   | 265                 | Friday      | 10 BID + 5      | 25                      |                                                 |
| 38   | 7   | 266                 | Saturday    | 10 BID + 5      | 25                      |                                                 |
| 39   | 1   | 267                 | Sunday      | 10 BID + 5      | 25                      |                                                 |
| 39   | 2   | 268                 | Monday      | 10 BID + 5      | 25                      |                                                 |
| 39   | 3   | 269                 | Tuesday     | 10+5            | 15                      | Missed lunch dose                               |

**Table S7. Open-Label Exposure to Chronic Glycine - Subject 3363: Actual Titration**

| Week | Day | Day<br>(cumulative) | Day of Week | Dose (g)<br>TID | Total Daily Dose<br>(g) | Deviation from<br>Scheduled Dose |
|------|-----|---------------------|-------------|-----------------|-------------------------|----------------------------------|
| 39   | 4   | 270                 | Wednesday   | 10 BID + 5      | 25                      |                                  |
| 39   | 5   | 271                 | Thursday    | 10 BID + 5      | 25                      |                                  |
| 39   | 6   | 272                 | Friday      | 10 BID + 5      | 25                      |                                  |
| 39   | 7   | 273                 | Saturday    | 10 BID + 5      | 25                      |                                  |
| 40   | 1   | 274                 | Sunday      | 10+5            | 15                      | Missed lunch dose                |
| 40   | 2   | 275                 | Monday      | 10+5            | 15                      | Missed lunch dose                |
| 40   | 3   | 276                 | Tuesday     | 10              | 10                      | Missed lunch and<br>dinner doses |
| 40   | 4   | 277                 | Wednesday   | 10 BID + 5      | 25                      |                                  |
| 40   | 5   | 278                 | Thursday    | 10 BID + 5      | 25                      |                                  |
| 40   | 6   | 279                 | Friday      | 10 BID + 5      | 25                      |                                  |
| 40   | 7   | 280                 | Saturday    | 10 BID + 5      | 25                      |                                  |
| 41   | 1   | 281                 | Sunday      | 10 BID + 5      | 25                      |                                  |
| 41   | 2   | 282                 | Monday      | 10 BID + 5      | 25                      |                                  |
| 41   | 3   | 283                 | Tuesday     | 10 BID + 5      | 25                      |                                  |
| 41   | 4   | 284                 | Wednesday   | 10 BID + 5      | 25                      |                                  |
| 41   | 5   | 285                 | Thursday    | 10 BID + 5      | 25                      |                                  |
| 41   | 6   | 286                 | Friday      | 10 BID + 5      | 25                      |                                  |
| 41   | 7   | 287                 | Saturday    | 10 BID          | 20                      | Missed dinner dose               |
| 42   | 1   | 288                 | Sunday      | 10 BID + 5      | 25                      |                                  |
| 42   | 2   | 289                 | Monday      | 10 BID + 5      | 25                      |                                  |
| 42   | 3   | 290                 | Tuesday     | 10 BID + 5      | 25                      |                                  |
| 42   | 4   | 291                 | Wednesday   | 10 BID + 5      | 25                      |                                  |
| 42   | 5   | 292                 | Thursday    | 10 BID + 5      | 25                      |                                  |

**Table S7. Open-Label Exposure to Chronic Glycine - Subject 3363: Actual Titration**

| Week | Day | Day<br>(cumulative) | Day of Week | Dose (g)<br>TID | Total Daily Dose<br>(g) | Deviation from<br>Scheduled Dose |
|------|-----|---------------------|-------------|-----------------|-------------------------|----------------------------------|
| 42   | 6   | 293                 | Friday      | 10 BID + 5      | 25                      |                                  |
| 42   | 7   | 294                 | Saturday    | 10 BID + 5      | 25                      |                                  |
| 43   | 1   | 295                 | Sunday      | 10 BID + 5      | 25                      |                                  |
| 43   | 2   | 296                 | Monday      | 10 +5           | 15                      | Missed lunch dose                |
| 43   | 3   | 297                 | Tuesday     | 10 BID + 5      | 25                      |                                  |
| 43   | 4   | 298                 | Wednesday   | 10 BID + 5      | 25                      |                                  |
| 43   | 5   | 299                 | Thursday    | 10 BID + 5      | 25                      |                                  |
| 43   | 6   | 300                 | Friday      | 10 BID + 5      | 25                      |                                  |
| 43   | 7   | 301                 | Saturday    | 10 BID + 5      | 25                      |                                  |
| 44   | 1   | 302                 | Sunday      | 10 BID + 5      | 25                      |                                  |
| 44   | 2   | 303                 | Monday      | 10 BID + 5      | 25                      |                                  |
| 44   | 3   | 304                 | Tuesday     | 10 BID + 5      | 25                      |                                  |
| 44   | 4   | 305                 | Wednesday   | 10 BID + 5      | 25                      |                                  |
| 44   | 5   | 306                 | Thursday    | 10 BID + 5      | 25                      |                                  |
| 44   | 6   | 307                 | Friday      | 10 BID + 5      | 25                      |                                  |
| 44   | 7   | 308                 | Saturday    | 10 BID + 5      | 25                      |                                  |
| 45   | 1   | 309                 | Sunday      | 10 BID + 5      | 25                      |                                  |
| 45   | 2   | 310                 | Monday      | 10 BID + 5      | 25                      |                                  |
| 45   | 3   | 311                 | Tuesday     | 10 BID + 5      | 25                      |                                  |
| 45   | 4   | 312                 | Wednesday   | 10 BID + 5      | 25                      |                                  |
| 45   | 5   | 313                 | Thursday    | 10 BID + 5      | 25                      |                                  |
| 45   | 6   | 314                 | Friday      | 10 BID + 5      | 25                      |                                  |
| 45   | 7   | 315                 | Saturday    | 10 BID + 5      | 25                      |                                  |



**Table S7. Open-Label Exposure to Chronic Glycine - Subject 3363: Actual Titration**

| <b>Week</b> | <b>Day</b> | <b>Day<br/>(cumulative)</b> | <b>Day of Week</b> | <b>Dose (g)<br/>TID</b> | <b>Total Daily Dose<br/>(g)</b> | <b>Deviation from<br/>Scheduled Dose</b> |
|-------------|------------|-----------------------------|--------------------|-------------------------|---------------------------------|------------------------------------------|
| 46          | 1          | 316                         | Sunday             | 10 BID + 5              | 25                              |                                          |
| 46          | 2          | 317                         | Monday             | 10 BID + 5              | 25                              |                                          |
| 46          | 3          | 318                         | Tuesday            | 10 BID + 5              | 25                              |                                          |
| 46          | 4          | 319                         | Wednesday          | 10 BID + 5              | 25                              |                                          |
| 46          | 5          | 320                         | Thursday           | 0                       | 0                               | Missed all doses                         |
| 46          | 6          | 321                         | Friday             | 0                       | 0                               | Missed all doses                         |
| 46          | 7          | 322                         | Saturday           | 10+5                    | 15                              | Missed breakfast                         |
| 47          | 1          | 323                         | Sunday             | 10 BID + 5              | 25                              |                                          |
| 47          | 2          | 324                         | Monday             | 10 BID + 5              | 25                              |                                          |
| 47          | 3          | 325                         | Tuesday            | 10 BID + 5              | 25                              |                                          |
| 47          | 4          | 326                         | Wednesday          | 10 BID + 5              | 25                              |                                          |
| 47          | 5          | 327                         | Thursday           | 10                      | 10                              | Breakfast only                           |

**Table S8. Open-Label Exposure to Chronic Glycine - Subject 5459: Actual Titration**

| Week | Day | Day<br>(cumulative) | Day of Week | Dose (g) TID | Total Daily Dose<br>(g) | Deviation from<br>Scheduled Dose                                                                                                                                |
|------|-----|---------------------|-------------|--------------|-------------------------|-----------------------------------------------------------------------------------------------------------------------------------------------------------------|
| 1    | 1   | 1                   | Sunday      | 1.8          | 5.4                     |                                                                                                                                                                 |
| 1    | 2   | 2                   | Monday      | 3            | 9                       |                                                                                                                                                                 |
| 1    | 3   | 3                   | Tuesday     | 5            | 15                      |                                                                                                                                                                 |
| 1    | 4   | 4                   | Wednesday   | 6.1          | 18.3                    |                                                                                                                                                                 |
| 1    | 5   | 5                   | Thursday    | 6.8          | 20.4                    |                                                                                                                                                                 |
| 1    | 6   | 6                   | Friday      | 8            | 24                      |                                                                                                                                                                 |
| 1    | 7   | 7                   | Saturday    | 10           | 30                      |                                                                                                                                                                 |
| 2    | 1   | 8                   | Sunday      | 11.1         | 33.3                    |                                                                                                                                                                 |
| 2    | 2   | 9                   | Monday      | 11.8         | 35.4                    |                                                                                                                                                                 |
| 2    | 3   | 10                  | Tuesday     | 13           | 39                      |                                                                                                                                                                 |
| 2    | 4   | 11                  | Wednesday   | 14.1         | 42.3                    |                                                                                                                                                                 |
| 2    | 5   | 12                  | Thursday    | 15.4         | 46.2                    | Nauseated but took salt<br>tablet and felt ok.                                                                                                                  |
| 2    | 6   | 13                  | Friday      | 16           | 31.4                    | Acutely nauseated within<br>45 minutes of breakfast<br>dose. Took salt tablet and<br>it did not help. Holding<br>lunch dose. If better by<br>dinner, take 15.4. |
| 2    | 7   | 14                  | Saturday    | 16           | 48                      |                                                                                                                                                                 |
| 3    | 1   | 15                  | Sunday      | 18           | 54                      |                                                                                                                                                                 |
| 3    | 2   | 16                  | Monday      | 19.1         | 57.3                    |                                                                                                                                                                 |
| 3    | 3   | 17                  | Tuesday     | 19.8         | 59.4                    |                                                                                                                                                                 |
| 3    | 4   | 18                  | Wednesday   | 21           | 63                      | Stops increasing dose<br>here                                                                                                                                   |

**Table S8. Open-Label Exposure to Chronic Glycine - Subject 5459: Actual Titration**

| <b>Week</b> | <b>Day</b> | <b>Day<br/>(cumulative)</b> | <b>Day of Week</b> | <b>Dose (g) TID</b> | <b>Total Daily Dose<br/>(g)</b> | <b>Deviation from<br/>Scheduled Dose</b> |
|-------------|------------|-----------------------------|--------------------|---------------------|---------------------------------|------------------------------------------|
| 3           | 5          | 19                          | Thursday           | 21                  | 63                              |                                          |
| 3           | 6          | 20                          | Friday             | 21                  | 63                              |                                          |
| 3           | 7          | 21                          | Saturday           | 21                  | 63                              |                                          |
| 4           | 1          | 22                          | Sunday             | 21                  | 63                              |                                          |
| 4           | 2          | 23                          | Monday             | 21                  | 63                              |                                          |
| 4           | 3          | 24                          | Tuesday            | 21                  | 63                              |                                          |
| 4           | 4          | 25                          | Wednesday          | 21                  | 63                              |                                          |
| 4           | 5          | 26                          | Thursday           | 21                  | 63                              |                                          |
| 4           | 6          | 27                          | Friday             | 21                  | 63                              |                                          |
| 4           | 7          | 28                          | Saturday           | 21                  | 63                              |                                          |
| 5           | 1          | 29                          | Sunday             | 21                  | 63                              |                                          |
| 5           | 2          | 30                          | Monday             | 21                  | 63                              |                                          |
| 5           | 3          | 31                          | Tuesday            | 21                  | 63                              |                                          |
| 5           | 4          | 32                          | Wednesday          | 21                  | 63                              |                                          |
| 5           | 5          | 33                          | Thursday           | 21                  | 63                              |                                          |
| 5           | 6          | 34                          | Friday             | 21                  | 63                              |                                          |
| 5           | 7          | 35                          | Saturday           | 21                  | 63                              |                                          |
| 6           | 1          | 36                          | Sunday             | 21                  | 63                              |                                          |
| 6           | 2          | 37                          | Monday             | 21                  | 63                              |                                          |
| 6           | 3          | 38                          | Tuesday            | 21                  | 63                              |                                          |
| 6           | 4          | 39                          | Wednesday          | 21                  | 63                              |                                          |
| 6           | 5          | 40                          | Thursday           | 21                  | 63                              |                                          |
| 6           | 6          | 41                          | Friday             | 21                  | 63                              |                                          |

**Table S8. Open-Label Exposure to Chronic Glycine - Subject 5459: Actual Titration**

| Week | Day | Day<br>(cumulative) | Day of Week | Dose (g) TID | Total Daily Dose<br>(g) | Deviation from<br>Scheduled Dose                                                                                                                       |
|------|-----|---------------------|-------------|--------------|-------------------------|--------------------------------------------------------------------------------------------------------------------------------------------------------|
| 6    | 7   | 42                  | Saturday    | 21           | 63                      |                                                                                                                                                        |
| 7    | 1   | 43                  | Sunday      | 21           | 63                      |                                                                                                                                                        |
| 7    | 2   | 44                  | Monday      | 21           | 63                      |                                                                                                                                                        |
| 7    | 3   | 45                  | Tuesday     | 21           | 63                      |                                                                                                                                                        |
| 7    | 4   | 46                  | Wednesday   | 21           | 63                      |                                                                                                                                                        |
| 7    | 5   | 47                  | Thursday    | 21           | 63                      |                                                                                                                                                        |
| 7    | 6   | 48                  | Friday      | 21           | 42                      | No dinner dose                                                                                                                                         |
| 7    | 7   | 49                  | Saturday    | 21           | 42                      | No dinner dose                                                                                                                                         |
| 8    | 1   | 50                  | Sunday      | 21           | 42                      | No dinner dose                                                                                                                                         |
| 8    | 2   | 51                  | Monday      | 21           | 42                      | No dinner dose                                                                                                                                         |
| 8    | 3   | 52                  | Tuesday     | 21           | 42                      | No dinner dose                                                                                                                                         |
| 8    | 4   | 53                  | Wednesday   | 21           | 42                      | No dinner dose                                                                                                                                         |
| 8    | 5   | 54                  | Thursday    | 18           | 36                      | Reduced dose to 18 g<br>TID so can drink quicker<br>without queasiness after<br>dinner but see below –<br>skipped most dinner<br>doses until 10/3/2014 |
| 8    | 6   | 55                  | Friday      | 18           | 36                      | No dinner dose                                                                                                                                         |
| 8    | 7   | 56                  | Saturday    | 18           | 36                      | No dinner dose                                                                                                                                         |
| 9    | 1   | 57                  | Sunday      | 18           | 36                      | No dinner dose                                                                                                                                         |
| 9    | 2   | 58                  | Monday      | 18           | 36                      | No dinner dose                                                                                                                                         |
| 9    | 3   | 59                  | Tuesday     | 18           | 36                      | No dinner dose                                                                                                                                         |
| 9    | 4   | 60                  | Wednesday   | 18           | 36                      | No dinner dose                                                                                                                                         |
| 9    | 5   | 61                  | Thursday    | 18           | 36                      | No dinner dose                                                                                                                                         |

**Table S8. Open-Label Exposure to Chronic Glycine - Subject 5459: Actual Titration**

| Week | Day | Day<br>(cumulative) | Day of Week | Dose (g) TID | Total Daily Dose<br>(g) | Deviation from<br>Scheduled Dose                                           |
|------|-----|---------------------|-------------|--------------|-------------------------|----------------------------------------------------------------------------|
| 9    | 6   | 62                  | Friday      | 18           | 36                      | No dinner dose                                                             |
| 9    | 7   | 63                  | Saturday    | 18           | 36                      | No dinner dose                                                             |
| 10   | 1   | 64                  | Sunday      | 18           | 36                      | No dinner dose                                                             |
| 10   | 2   | 65                  | Monday      | 18           | 36                      | No dinner dose                                                             |
| 10   | 3   | 66                  | Tuesday     | 18           | 36                      | No dinner dose                                                             |
| 10   | 4   | 67                  | Wednesday   | 18           | 36                      | No dinner dose                                                             |
| 10   | 5   | 68                  | Thursday    | 18           | 36                      | No dinner dose                                                             |
| 10   | 6   | 69                  | Friday      | 18           | 18                      | Took only one dose                                                         |
| 10   | 7   | 70                  | Saturday    | 18           | 36                      | No dinner dose                                                             |
| 11   | 1   | 71                  | Sunday      | 18           | 36                      | No dinner dose                                                             |
| 11   | 2   | 72                  | Monday      | 18           | 36                      | No dinner dose                                                             |
| 11   | 3   | 73                  | Tuesday     | 18           | 36                      | No dinner dose                                                             |
| 11   | 4   | 74                  | Wednesday   | 18           | 36                      | Due to so many skipped doses take only 6 g at dinner – skipped dinner dose |
| 11   | 5   | 75                  | Thursday    | 18           | 36                      | No dinner dose                                                             |
| 11   | 6   | 76                  | Friday      | 18           | 36                      | No dinner dose                                                             |
| 11   | 7   | 77                  | Saturday    | 18           | 36                      | No dinner dose                                                             |
| 12   | 1   | 78                  | Sunday      | 18           | 36                      | No dinner dose                                                             |
| 12   | 2   | 79                  | Monday      | 18           | 36                      | No dinner dose                                                             |
| 12   | 3   | 80                  | Tuesday     | 18           | 36                      | No dinner dose                                                             |
| 12   | 4   | 81                  | Wednesday   | 18           | 36                      | No dinner dose                                                             |
| 12   | 5   | 82                  | Thursday    | 18           | 36                      | No dinner dose                                                             |

**Table S8. Open-Label Exposure to Chronic Glycine - Subject 5459: Actual Titration**

| Week | Day | Day<br>(cumulative) | Day of Week | Dose (g) TID | Total Daily Dose<br>(g) | Deviation from<br>Scheduled Dose |
|------|-----|---------------------|-------------|--------------|-------------------------|----------------------------------|
| 12   | 6   | 83                  | Friday      | 18           | 36                      | No dinner dose                   |
| 12   | 7   | 84                  | Saturday    | 18           | 36                      | No dinner dose                   |
| 13   | 1   | 85                  | Sunday      | 18           | 36                      | No dinner dose                   |
| 13   | 2   | 86                  | Monday      | 18           | 36                      | No dinner dose                   |
| 13   | 3   | 87                  | Tuesday     | 18           | 36                      | No dinner dose                   |
| 13   | 4   | 88                  | Wednesday   | 18           | 36                      | No dinner dose                   |
| 13   | 5   | 89                  | Thursday    | 18           | 36                      | No dinner dose                   |
| 13   | 6   | 90                  | Friday      | 18           | 36                      | No dinner dose                   |
| 13   | 7   | 91                  | Saturday    | 18           | 36                      | No dinner dose                   |
| 14   | 1   | 92                  | Sunday      | 18           | 36                      | No dinner dose                   |
| 14   | 2   | 93                  | Monday      | 18           | 36                      | No dinner dose                   |
| 14   | 3   | 94                  | Tuesday     | 18           | 36                      | No dinner dose                   |
| 14   | 4   | 95                  | Wednesday   | 18           | 36                      | No dinner dose                   |
| 14   | 5   | 96                  | Thursday    | 18           | 36                      | No dinner dose                   |
| 14   | 6   | 97                  | Friday      | 18           | 36                      | No dinner dose                   |
| 14   | 7   | 98                  | Saturday    | 18           | 36                      | No dinner dose                   |
| 15   | 1   | 99                  | Sunday      | 18           | 36                      | No dinner dose                   |
| 15   | 2   | 100                 | Monday      | 18           | 36                      | No dinner dose                   |
| 15   | 3   | 101                 | Tuesday     | 18           | 36                      | No dinner dose                   |
| 15   | 4   | 102                 | Wednesday   | 18           | 36                      | No dinner dose                   |
| 15   | 5   | 103                 | Thursday    | 18           | 36                      | No dinner dose                   |
| 15   | 6   | 104                 | Friday      | 18           | 36                      | No dinner dose                   |
| 15   | 7   | 105                 | Saturday    | 18           | 36                      | No dinner dose                   |

**Table S8. Open-Label Exposure to Chronic Glycine - Subject 5459: Actual Titration**

| <b>Week</b> | <b>Day</b> | <b>Day<br/>(cumulative)</b> | <b>Day of Week</b> | <b>Dose (g) TID</b> | <b>Total Daily Dose<br/>(g)</b> | <b>Deviation from<br/>Scheduled Dose</b> |
|-------------|------------|-----------------------------|--------------------|---------------------|---------------------------------|------------------------------------------|
| 16          | 1          | 106                         | Sunday             | 18                  | 27                              | Took 1.5 doses                           |
| 16          | 2          | 107                         | Monday             | 18                  | 27                              | Took 1.5 doses                           |
| 16          | 3          | 108                         | Tuesday            | 18                  | 27                              | Took 1.5 doses                           |
| 16          | 4          | 109                         | Wednesday          | 18                  | 18                              | Took only one dose                       |
| 16          | 5          | 110                         | Thursday           | 18                  | 18                              | Took only one dose                       |
| 16          | 6          | 111                         | Friday             | 18                  | 18                              | Took only one dose                       |
| 16          | 7          | 112                         | Saturday           | 0                   | 0                               | Stopped                                  |
| 17          | 1          | 113                         | Sunday             | 0                   | 0                               | Stopped                                  |
| 17          | 2          | 114                         | Monday             | 0                   | 0                               | Stopped                                  |
| 17          | 3          | 115                         | Tuesday            | 0                   | 0                               | Stopped                                  |
| 17          | 4          | 116                         | Wednesday          | 0                   | 0                               | Stopped                                  |
| 17          | 5          | 117                         | Thursday           | 0                   | 0                               | Stopped                                  |
| 17          | 6          | 118                         | Friday             | 0                   | 0                               | Stopped                                  |
| 17          | 7          | 119                         | Saturday           | 0                   | 0                               | Stopped                                  |
| 18          | 1          | 120                         | Sunday             | 0                   | 0                               | Stopped                                  |
| 18          | 2          | 121                         | Monday             | 0                   | 0                               | Stopped                                  |
| 18          | 3          | 122                         | Tuesday            | 0                   | 0                               | Stopped                                  |
| 18          | 4          | 123                         | Wednesday          | 0                   | 0                               | Stopped                                  |
| 18          | 5          | 124                         | Thursday           | 0                   | 0                               | Stopped                                  |
| 18          | 6          | 125                         | Friday             | 0                   | 0                               | Stopped                                  |
| 18          | 7          | 126                         | Saturday           | 0                   | 0                               | Stopped                                  |
| 19          | 1          | 127                         | Sunday             | 0                   | 0                               | Stopped                                  |
| 19          | 2          | 128                         | Monday             | 0                   | 0                               | Stopped                                  |

**Table S8. Open-Label Exposure to Chronic Glycine - Subject 5459: Actual Titration**

| Week | Day | Day (cumulative) | Day of Week | Dose (g) TID | Total Daily Dose (g) | Deviation from Scheduled Dose           |
|------|-----|------------------|-------------|--------------|----------------------|-----------------------------------------|
| 19   | 3   | 129              | Tuesday     | 5            | 5                    | Re-starts glycine – one dose in evening |
| 19   | 4   | 130              | Wednesday   | 5            | 15                   |                                         |
| 19   | 5   | 131              | Thursday    | 5            | 15                   |                                         |
| 19   | 6   | 132              | Friday      | 5            | 10                   | Skipped one dose                        |
| 19   | 7   | 133              | Saturday    | 5            | 10                   | Skipped one dose                        |
| 20   | 1   | 134              | Sunday      | 5            | 15                   |                                         |
| 20   | 2   | 135              | Monday      | 5            | 15                   |                                         |
| 20   | 3   | 136              | Tuesday     | 6.1          | 18.3                 |                                         |
| 20   | 4   | 137              | Wednesday   | 6.8          | 20.4                 |                                         |
| 20   | 5   | 138              | Thursday    | 6.8          | 20.4                 |                                         |
| 20   | 6   | 139              | Friday      | 6.8          | 20.4                 |                                         |
| 20   | 7   | 140              | Saturday    | 6.8          | 20.4                 |                                         |
| 21   | 1   | 141              | Sunday      | 6.8          | 20.4                 |                                         |
| 21   | 2   | 142              | Monday      | 8            | 24                   |                                         |
| 21   | 3   | 143              | Tuesday     | 8            | 24                   |                                         |
| 21   | 4   | 144              | Wednesday   | 8            | 24                   |                                         |
| 21   | 5   | 145              | Thursday    | 8            | 24                   |                                         |
| 21   | 6   | 146              | Friday      | 8            | 24                   |                                         |
| 21   | 7   | 147              | Saturday    | 8            | 24                   |                                         |
| 22   | 1   | 148              | Sunday      | 10           | 30                   |                                         |
| 22   | 2   | 149              | Monday      | 10           | 30                   |                                         |
| 22   | 3   | 150              | Tuesday     | 10           | 30                   |                                         |
| 22   | 4   | 151              | Wednesday   | 10           | 30                   |                                         |



**Table S8. Open-Label Exposure to Chronic Glycine - Subject 5459: Actual Titration**

| Week | Day | Day<br>(cumulative) | Day of Week | Dose (g) TID | Total Daily Dose<br>(g) | Deviation from<br>Scheduled Dose |
|------|-----|---------------------|-------------|--------------|-------------------------|----------------------------------|
| 22   | 5   | 152                 | Thursday    | 10           | 30                      |                                  |
| 22   | 6   | 153                 | Friday      | 10           | 30                      |                                  |
| 22   | 7   | 154                 | Saturday    | 10           | 10                      | Missed 2 doses                   |
| 23   | 1   | 155                 | Sunday      | 10           | 30                      |                                  |
| 23   | 2   | 156                 | Monday      | 10           | 30                      |                                  |
| 23   | 3   | 157                 | Tuesday     | 10           | 30                      |                                  |
| 23   | 4   | 158                 | Wednesday   | 10           | 30                      |                                  |
| 23   | 5   | 159                 | Thursday    | 10           | 30                      |                                  |
| 23   | 6   | 160                 | Friday      | 10           | 30                      |                                  |
| 23   | 7   | 161                 | Saturday    | 10           | 30                      |                                  |
| 24   | 1   | 162                 | Sunday      | 13           | 39                      | No side effects                  |
| 24   | 2   | 163                 | Monday      | 13           | 39                      |                                  |
| 24   | 3   | 164                 | Tuesday     | 13           | 39                      |                                  |
| 24   | 4   | 165                 | Wednesday   | 13           | 39                      |                                  |
| 24   | 5   | 166                 | Thursday    | 13           | 39                      |                                  |
| 24   | 6   | 167                 | Friday      | 13           | 39                      |                                  |
| 24   | 7   | 168                 | Saturday    | 13           | 39                      |                                  |
| 25   | 1   | 169                 | Sunday      | 13           | 39                      |                                  |
| 25   | 2   | 170                 | Monday      | 13           | 39                      |                                  |
| 25   | 3   | 171                 | Tuesday     | 13           | 39                      | No side effects                  |
| 25   | 4   | 172                 | Wednesday   | 13           | 39                      |                                  |
| 25   | 5   | 173                 | Thursday    | 13           | 39                      |                                  |
| 25   | 6   | 174                 | Friday      | 13           | 39                      |                                  |

**Table S8. Open-Label Exposure to Chronic Glycine - Subject 5459: Actual Titration**

| Week | Day | Day<br>(cumulative) | Day of Week | Dose (g) TID | Total Daily Dose<br>(g) | Deviation from<br>Scheduled Dose |
|------|-----|---------------------|-------------|--------------|-------------------------|----------------------------------|
| 25   | 7   | 175                 | Saturday    | 13           | 39                      |                                  |
| 26   | 1   | 176                 | Sunday      | 13           | 39                      |                                  |
| 26   | 2   | 177                 | Monday      | 13           | 39                      |                                  |
| 26   | 3   | 178                 | Tuesday     | 13           | 39                      | No side effects                  |
| 26   | 4   | 179                 | Wednesday   | 13           | 39                      |                                  |
| 26   | 5   | 180                 | Thursday    | 13           | 39                      |                                  |
| 26   | 6   | 181                 | Friday      | 13           | 39                      |                                  |
| 26   | 7   | 182                 | Saturday    | 13           | 39                      |                                  |
| 27   | 1   | 183                 | Sunday      | 13           | 39                      |                                  |
| 27   | 2   | 184                 | Monday      | 13           | 39                      |                                  |
| 27   | 3   | 185                 | Tuesday     | 13           | 39                      |                                  |
| 27   | 4   | 186                 | Wednesday   | 13           | 39                      | No side effects                  |
| 27   | 5   | 187                 | Thursday    | 13           | 39                      |                                  |
| 27   | 6   | 188                 | Friday      | 13           | 39                      |                                  |
| 27   | 7   | 189                 | Saturday    | 13           | 39                      |                                  |
| 28   | 1   | 190                 | Sunday      | 13           | 39                      |                                  |
| 28   | 2   | 191                 | Monday      | 13           | 39                      | No side effects                  |
| 28   | 3   | 192                 | Tuesday     | 13           | 39                      |                                  |
| 28   | 4   | 193                 | Wednesday   | 13           | 39                      |                                  |
| 28   | 5   | 194                 | Thursday    | 13           | 39                      |                                  |
| 28   | 6   | 195                 | Friday      | 13           | 39                      |                                  |
| 28   | 7   | 196                 | Saturday    | 13           | 39                      |                                  |
| 29   | 1   | 197                 | Sunday      | 13           | 39                      |                                  |

**Table S8. Open-Label Exposure to Chronic Glycine - Subject 5459: Actual Titration**

| <b>Week</b> | <b>Day</b> | <b>Day<br/>(cumulative)</b> | <b>Day of Week</b> | <b>Dose (g) TID</b> | <b>Total Daily Dose<br/>(g)</b> | <b>Deviation from<br/>Scheduled Dose</b> |
|-------------|------------|-----------------------------|--------------------|---------------------|---------------------------------|------------------------------------------|
| 29          | 2          | 198                         | Monday             | 13                  | 39                              |                                          |
| 29          | 3          | 199                         | Tuesday            | 0                   | 0                               | No doses                                 |
| 29          | 4          | 200                         | Wednesday          | 13                  | 26                              | Missed one dose                          |
| 29          | 5          | 201                         | Thursday           | 13                  | 39                              |                                          |
| 29          | 6          | 202                         | Friday             | 13                  | 39                              |                                          |
| 29          | 7          | 203                         | Saturday           | 13                  | 39                              |                                          |
| 30          | 1          | 204                         | Sunday             | 13                  | 39                              |                                          |
| 30          | 2          | 205                         | Monday             | 13                  | 39                              |                                          |
| 30          | 3          | 206                         | Tuesday            | 13                  | 39                              |                                          |
| 30          | 4          | 207                         | Wednesday          | 13                  | 39                              |                                          |
| 30          | 5          | 208                         | Thursday           | 13                  | 39                              |                                          |
| 30          | 6          | 209                         | Friday             | 13                  | 39                              |                                          |
| 30          | 7          | 210                         | Saturday           | 13                  | 39                              |                                          |
| 31          | 1          | 211                         | Sunday             | 13                  | 39                              |                                          |
| 31          | 2          | 212                         | Monday             | 10                  | 30                              | Loose stools                             |
| 31          | 3          | 213                         | Tuesday            | 10                  | 30                              |                                          |
| 31          | 4          | 214                         | Wednesday          | 10                  | 30                              |                                          |
| 31          | 5          | 215                         | Thursday           | 10                  | 30                              |                                          |
| 31          | 6          | 216                         | Friday             | 10                  | 30                              |                                          |
| 31          | 7          | 217                         | Saturday           | 10                  | 30                              |                                          |
| 32          | 1          | 218                         | Sunday             | 10                  | 30                              |                                          |
| 32          | 2          | 219                         | Monday             | 10                  | 30                              |                                          |
| 32          | 3          | 220                         | Tuesday            | 0                   | 0                               | No doses                                 |

**Table S8. Open-Label Exposure to Chronic Glycine - Subject 5459: Actual Titration**

| Week | Day | Day (cumulative) | Day of Week | Dose (g) TID | Total Daily Dose (g) | Deviation from Scheduled Dose |
|------|-----|------------------|-------------|--------------|----------------------|-------------------------------|
| 32   | 4   | 221              | Wednesday   | 8            | 24                   | Loose stools                  |
| 32   | 5   | 222              | Thursday    | 8            | 24                   |                               |
| 32   | 6   | 223              | Friday      | 8            | 24                   |                               |
| 32   | 7   | 224              | Saturday    | 8            | 24                   |                               |
| 33   | 1   | 225              | Sunday      | 8            | 24                   |                               |
| 33   | 2   | 226              | Monday      | 8            | 24                   |                               |
| 33   | 3   | 227              | Tuesday     | 0            | 0                    | No doses                      |
| 33   | 4   | 228              | Wednesday   | 8            | 16                   | Missed one dose               |
| 33   | 5   | 229              | Thursday    | 8            | 16                   |                               |
| 33   | 6   | 230              | Friday      | 8            | 16                   |                               |
| 33   | 7   | 231              | Saturday    | 8            | 16                   |                               |
| 34   | 1   | 232              | Sunday      | 8            | 16                   | Missed one dose               |
| 34   | 2   | 233              | Monday      | 8            | 8                    | One dose                      |
| 34   | 3   | 234              | Tuesday     | 8            | 8                    | One dose                      |
| 34   | 4   | 235              | Wednesday   | 10           | 10                   | Diarrhea on second dose       |
| 34   | 5   | 236              | Thursday    | 5            | 5                    | One dose                      |
| 34   | 6   | 237              | Friday      | 5            | 10                   | Two doses                     |
| 34   | 7   | 238              | Saturday    | 5            | 10                   | Two doses                     |
| 35   | 1   | 239              | Sunday      | 5            | 10                   | Two doses                     |
| 35   | 2   | 240              | Monday      | 5            | 5                    | Take only 5 g/d               |
| 35   | 3   | 241              | Tuesday     | 5            | 5                    | Take only 5 g/d               |
| 35   | 4   | 242              | Wednesday   | 5            | 5                    | Take only 5 g/d               |
| 35   | 5   | 243              | Thursday    | 5            | 5                    | Take only 5 g/d               |

**Table S8. Open-Label Exposure to Chronic Glycine - Subject 5459: Actual Titration**

| Week | Day | Day<br>(cumulative) | Day of Week | Dose (g) TID | Total Daily Dose<br>(g) | Deviation from<br>Scheduled Dose |
|------|-----|---------------------|-------------|--------------|-------------------------|----------------------------------|
| 35   | 6   | 244                 | Friday      | 5            | 5                       | Take only 5 g/d                  |
| 35   | 7   | 245                 | Saturday    | 5            | 5                       | Take only 5 g/d                  |
| 36   | 1   | 246                 | Sunday      | 5            | 5                       | Take only 5 g/d                  |
| 36   | 2   | 247                 | Monday      | 5            | 5                       | Take only 5 g/d                  |
| 36   | 3   | 248                 | Tuesday     | 5            | 5                       | Take only 5 g/d                  |
| 36   | 4   | 249                 | Wednesday   | 5            | 5                       | Take only 5 g/d                  |
| 36   | 5   | 250                 | Thursday    | 5            | 5                       | Take only 5 g/d                  |
| 36   | 6   | 251                 | Friday      | 5            | 5                       | Take only 5 g/d                  |
| 36   | 7   | 252                 | Saturday    | 5            | 5                       | Take only 5 g/d                  |
| 37   | 1   | 253                 | Sunday      | 5            | 5                       | Take only 5 g/d                  |
| 37   | 2   | 254                 | Monday      | 5            | 5                       | Take only 5 g/d                  |
| 37   | 3   | 255                 | Tuesday     | 5            | 5                       | Take only 5 g/d                  |
| 37   | 4   | 256                 | Wednesday   | 5            | 5                       | Take only 5 g/d                  |
| 37   | 5   | 257                 | Thursday    | 5            | 5                       | Take only 5 g/d                  |
| 37   | 6   | 258                 | Friday      | 5            | 5                       | Take only 5 g/d                  |
| 37   | 7   | 259                 | Saturday    | 5            | 5                       | Take only 5 g/d                  |
| 38   | 1   | 260                 | Sunday      | 5            | 5                       | Take only 5 g/d                  |
| 38   | 2   | 261                 | Monday      | 6.1          | 6.1                     | Increase to 6.1                  |
| 38   | 3   | 262                 | Tuesday     | 6.1          | 6.1                     |                                  |
| 38   | 4   | 263                 | Wednesday   | 6.1          | 6.1                     |                                  |
| 38   | 5   | 264                 | Thursday    | 6.1          | 6.1                     |                                  |
| 38   | 6   | 265                 | Friday      | 6.1          | 6.1                     |                                  |
| 38   | 7   | 266                 | Saturday    | 6.1          | 6.1                     |                                  |

**Table S8. Open-Label Exposure to Chronic Glycine - Subject 5459: Actual Titration**

| Week | Day | Day<br>(cumulative) | Day of Week | Dose (g) TID | Total Daily Dose<br>(g) | Deviation from<br>Scheduled Dose |
|------|-----|---------------------|-------------|--------------|-------------------------|----------------------------------|
| 39   | 1   | 267                 | Sunday      | 6.1          | 6.1                     |                                  |
| 39   | 2   | 268                 | Monday      | 6.1          | 6.1                     |                                  |
| 39   | 3   | 269                 | Tuesday     | 6.1          | 6.1                     |                                  |
| 39   | 4   | 270                 | Wednesday   | 6.1          | 6.1                     |                                  |
| 39   | 5   | 271                 | Thursday    | 0            | 0                       | Missed all                       |
| 39   | 6   | 272                 | Friday      | 0            | 0                       | Missed all                       |
| 39   | 7   | 273                 | Saturday    | 0            | 0                       | Missed all                       |
| 40   | 1   | 274                 | Sunday      | 0            | 0                       | Loose stools                     |
| 40   | 2   | 275                 | Monday      | 5            | 5                       | Loose stools                     |
| 40   | 3   | 276                 | Tuesday     | 0            | 0                       |                                  |
| 40   | 4   | 277                 | Wednesday   | 0            | 0                       |                                  |
| 40   | 5   | 278                 | Thursday    | 5            | 5                       | Loose stools                     |
| 40   | 6   | 279                 | Friday      | 5            | 5                       |                                  |
| 40   | 7   | 280                 | Saturday    | 5            | 5                       |                                  |
| 41   | 1   | 281                 | Sunday      | 5            | 5                       |                                  |
| 41   | 2   | 282                 | Monday      | 5            | 5                       |                                  |
| 41   | 3   | 283                 | Tuesday     | 5            | 5                       |                                  |
| 41   | 4   | 284                 | Wednesday   | 5            | 5                       |                                  |
| 41   | 5   | 285                 | Thursday    | 5            | 5                       |                                  |
| 41   | 6   | 286                 | Friday      | 5            | 5                       |                                  |
| 41   | 7   | 287                 | Saturday    | 5            | 5                       |                                  |
| 42   | 1   | 288                 | Sunday      | 5            | 5                       |                                  |
| 42   | 2   | 289                 | Monday      | 5            | 5                       |                                  |

**Table S8. Open-Label Exposure to Chronic Glycine - Subject 5459: Actual Titration**

| <b>Week</b> | <b>Day</b> | <b>Day<br/>(cumulative)</b> | <b>Day of Week</b> | <b>Dose (g) TID</b> | <b>Total Daily Dose<br/>(g)</b> | <b>Deviation from<br/>Scheduled Dose</b> |
|-------------|------------|-----------------------------|--------------------|---------------------|---------------------------------|------------------------------------------|
| 42          | 3          | 290                         | Tuesday            | 5                   | 5                               |                                          |
| 42          | 4          | 291                         | Wednesday          | 5                   | 5                               |                                          |
| 42          | 5          | 292                         | Thursday           | 5                   | 5                               |                                          |
| 42          | 6          | 293                         | Friday             | 5                   | 5                               |                                          |
| 42          | 7          | 294                         | Saturday           | 5                   | 5                               |                                          |
| 43          | 1          | 295                         | Sunday             | 5                   | 5                               |                                          |
| 43          | 2          | 296                         | Monday             | 5                   | 5                               |                                          |
| 43          | 3          | 297                         | Tuesday            | 5                   | 5                               |                                          |
| 43          | 4          | 298                         | Wednesday          | 5                   | 5                               |                                          |
| 43          | 5          | 299                         | Thursday           | 5                   | 5                               |                                          |
| 43          | 6          | 300                         | Friday             | 5                   | 5                               |                                          |
| 43          | 7          | 301                         | Saturday           | 5                   | 5                               |                                          |
| 44          | 1          | 302                         | Sunday             | 5                   | 5                               |                                          |
| 44          | 2          | 303                         | Monday             | 5                   | 5                               |                                          |
| 44          | 3          | 304                         | Tuesday            | 5                   | 5                               |                                          |
| 44          | 4          | 305                         | Wednesday          | 5                   | 5                               |                                          |
| 44          | 5          | 306                         | Thursday           | 5                   | 5                               |                                          |
| 44          | 6          | 307                         | Friday             | 5                   | 5                               |                                          |
| 44          | 7          | 308                         | Saturday           | 5                   | 5                               |                                          |
| 45          | 1          | 309                         | Sunday             | 0                   | 0                               | No doses                                 |
| 45          | 2          | 310                         | Monday             | 0                   | 0                               | No doses                                 |
| 45          | 3          | 311                         | Tuesday            | 5                   | 5                               |                                          |
| 45          | 4          | 312                         | Wednesday          | 5                   | 5                               |                                          |

**Table S8. Open-Label Exposure to Chronic Glycine - Subject 5459: Actual Titration**

| <b>Week</b> | <b>Day</b> | <b>Day<br/>(cumulative)</b> | <b>Day of Week</b> | <b>Dose (g) TID</b> | <b>Total Daily Dose<br/>(g)</b> | <b>Deviation from<br/>Scheduled Dose</b> |
|-------------|------------|-----------------------------|--------------------|---------------------|---------------------------------|------------------------------------------|
| 45          | 5          | 313                         | Thursday           | 5                   | 5                               |                                          |
| 45          | 6          | 314                         | Friday             | 0                   | 0                               | Missed all doses                         |
| 45          | 7          | 315                         | Saturday           | 0                   | 0                               | Missed all doses                         |
| 46          | 1          | 316                         | Sunday             | 0                   | 0                               | Missed all doses                         |
| 46          | 2          | 317                         | Monday             | 5                   | 5                               |                                          |
| 46          | 3          | 318                         | Tuesday            | 5                   | 5                               |                                          |
| 46          | 4          | 319                         | Wednesday          | 5                   | 5                               |                                          |
| 46          | 5          | 320                         | Thursday           | 5                   | 5                               |                                          |
| 46          | 6          | 321                         | Friday             | 5                   | 5                               |                                          |
| 46          | 7          | 322                         | Saturday           | 5                   | 5                               |                                          |
| 47          | 1          | 323                         | Sunday             | 5                   | 5                               |                                          |
| 47          | 2          | 324                         | Monday             | 5                   | 5                               | Last day of dosing                       |



**Table S1A. Double-Blind Exposure to Glycine - Subject 5459: Planned Titration**

| <b>McLean Hospital Research Pharmacy</b>                                                                                                                                                                                                                                                                                                                                                                                                                                                                                            |       |                                                    |                                                |                                      |
|-------------------------------------------------------------------------------------------------------------------------------------------------------------------------------------------------------------------------------------------------------------------------------------------------------------------------------------------------------------------------------------------------------------------------------------------------------------------------------------------------------------------------------------|-------|----------------------------------------------------|------------------------------------------------|--------------------------------------|
| <b>Dose Titration for Glycine/Palatinose 3:1 Mixture - Arm 1</b>                                                                                                                                                                                                                                                                                                                                                                                                                                                                    |       |                                                    |                                                |                                      |
| ("Palatinose 3:1 Mixture," also referred to "Palatinose," is the placebo for glycine)                                                                                                                                                                                                                                                                                                                                                                                                                                               |       |                                                    |                                                |                                      |
| Titration Schedule for subject #5459, Arm 1, is based on a weight of 209 lbs (95 kg).                                                                                                                                                                                                                                                                                                                                                                                                                                               |       |                                                    |                                                |                                      |
| <b>Dose Titration:</b> Start with 6 gm/day on day one and increase as noted below, until maintenance dose of 0.8 gm glycine/placebo per kg body weight (76 gm/day) is achieved.                                                                                                                                                                                                                                                                                                                                                     |       |                                                    |                                                |                                      |
| <b>Note:</b> glycine/placebo is dosed TID                                                                                                                                                                                                                                                                                                                                                                                                                                                                                           |       |                                                    |                                                |                                      |
| <b>Reconstitution Directions:</b> Subjects pour contents from flavoring bottle (B) into glycine/palatinose bottle (A) and then add water to the fill line indicated on the glycine/palatinose bottle (A). When mixed as instructed, the flavored Glycine/Patatinose solution results in a final glycine/palatinose concentration of 20% w/v (0.2 gm glycine/palatinose/mL of solution). Volume contributed by the various powders has been factored into the calculation for the amount of water required to attain a 20% solution. |       |                                                    |                                                |                                      |
| <b>If a subject's dose needs to be changed for any reason,</b> reconstitution directions remain the same. <b>The volume to be administered will need to be adjusted.</b> Below is the titration schedule showing gm/dose and volume/dose.                                                                                                                                                                                                                                                                                           |       |                                                    |                                                |                                      |
| Week #                                                                                                                                                                                                                                                                                                                                                                                                                                                                                                                              | Day # | Glycine/Palatinose<br>Total Daily Dose<br>(gm/day) | Glycine/Palatinose<br>(gm/dose)<br>(dosed TID) | Total Volume(mL)/Dose<br>(dosed TID) |
| 1                                                                                                                                                                                                                                                                                                                                                                                                                                                                                                                                   | 1     | 6                                                  | 2                                              | 10                                   |
|                                                                                                                                                                                                                                                                                                                                                                                                                                                                                                                                     | 2     | 9                                                  | 3                                              | 15                                   |
|                                                                                                                                                                                                                                                                                                                                                                                                                                                                                                                                     | 3     | 12                                                 | 4                                              | 20                                   |
|                                                                                                                                                                                                                                                                                                                                                                                                                                                                                                                                     | 4     | 15                                                 | 5                                              | 25                                   |
|                                                                                                                                                                                                                                                                                                                                                                                                                                                                                                                                     | 5     | 18                                                 | 6                                              | 30                                   |
|                                                                                                                                                                                                                                                                                                                                                                                                                                                                                                                                     | 6     | 21                                                 | 7                                              | 35                                   |
|                                                                                                                                                                                                                                                                                                                                                                                                                                                                                                                                     | 7     | 24                                                 | 8                                              | 40                                   |
| 2                                                                                                                                                                                                                                                                                                                                                                                                                                                                                                                                   | 1     | 27                                                 | 9                                              | 45                                   |
|                                                                                                                                                                                                                                                                                                                                                                                                                                                                                                                                     | 2     | 30                                                 | 10                                             | 50                                   |
|                                                                                                                                                                                                                                                                                                                                                                                                                                                                                                                                     | 3     | 36                                                 | 12                                             | 60                                   |
|                                                                                                                                                                                                                                                                                                                                                                                                                                                                                                                                     | 4     | 42                                                 | 14                                             | 70                                   |
|                                                                                                                                                                                                                                                                                                                                                                                                                                                                                                                                     | 5     | 48                                                 | 16                                             | 80                                   |
|                                                                                                                                                                                                                                                                                                                                                                                                                                                                                                                                     | 6     | 54                                                 | 18                                             | 90                                   |
|                                                                                                                                                                                                                                                                                                                                                                                                                                                                                                                                     | 7     | 60                                                 | 20                                             | 100                                  |
| 3                                                                                                                                                                                                                                                                                                                                                                                                                                                                                                                                   | 1     | 66                                                 | 22                                             | 110                                  |
|                                                                                                                                                                                                                                                                                                                                                                                                                                                                                                                                     | 2     | 72                                                 | 24                                             | 120                                  |

**Table S1A. Double-Blind Exposure to Glycine - Subject 5459: Planned Titration**

---

|                                                          |    |      |       |
|----------------------------------------------------------|----|------|-------|
| Week 3, day 3 thru<br>Week 6 day 7 (maintenance<br>dose) | 76 | 25.3 | 126.7 |
|----------------------------------------------------------|----|------|-------|

---

**Table S2A. Double-Blind Exposure to Placebo - Subject 5459: Planned Titration**

| <b>McLean Hospital Research Pharmacy</b>                                                                                                                                                                                                                                                                                                                                                                                                                                                                                            |       |                                                    |                                                |                                      |
|-------------------------------------------------------------------------------------------------------------------------------------------------------------------------------------------------------------------------------------------------------------------------------------------------------------------------------------------------------------------------------------------------------------------------------------------------------------------------------------------------------------------------------------|-------|----------------------------------------------------|------------------------------------------------|--------------------------------------|
| <b>Dose Titration for Glycine/Palatinose 3:1 Mixture - Arm 2</b>                                                                                                                                                                                                                                                                                                                                                                                                                                                                    |       |                                                    |                                                |                                      |
| ("Palatinose 3:1 Mixture," also referred to "Palatinose," is the placebo for glycine)                                                                                                                                                                                                                                                                                                                                                                                                                                               |       |                                                    |                                                |                                      |
| Titration Schedule for subject #5459, Arm 2, is based on a weight of 200 lbs (90.9 kg).                                                                                                                                                                                                                                                                                                                                                                                                                                             |       |                                                    |                                                |                                      |
| <b>Dose Titration:</b> Start with 6 gm/day on week 9, day one, and increase as noted below, until maintenance dose of 0.8 gm glycine/placebo per kg body weight (72.7 gm/day) is achieved.                                                                                                                                                                                                                                                                                                                                          |       |                                                    |                                                |                                      |
| <b>Note:</b> glycine/placebo is dosed TID                                                                                                                                                                                                                                                                                                                                                                                                                                                                                           |       |                                                    |                                                |                                      |
| <b>Reconstitution Directions:</b> Subjects pour contents from flavoring bottle (B) into glycine/palatinose bottle (A) and then add water to the fill line indicated on the glycine/palatinose bottle (A). When mixed as instructed, the flavored Glycine/Palatinose solution results in a final glycine/palatinose concentration of 20% w/v (0.2 gm glycine/palatinose/mL of solution). Volume contributed by the various powders has been factored into the calculation for the amount of water required to attain a 20% solution. |       |                                                    |                                                |                                      |
| <b>If a subject's dose needs to be changed for any reason,</b> reconstitution directions remain the same. <b>The volume to be administered will need to be adjusted.</b> Below is the titration schedule showing gm/dose and volume/dose.                                                                                                                                                                                                                                                                                           |       |                                                    |                                                |                                      |
| Week #                                                                                                                                                                                                                                                                                                                                                                                                                                                                                                                              | Day # | Glycine/Palatinose<br>Total Daily Dose<br>(gm/day) | Glycine/Palatinose<br>(gm/dose)<br>(dosed TID) | Total Volume(mL)/Dose<br>(dosed TID) |
| 1                                                                                                                                                                                                                                                                                                                                                                                                                                                                                                                                   | 1     | 6                                                  | 2                                              | 10                                   |
|                                                                                                                                                                                                                                                                                                                                                                                                                                                                                                                                     | 2     | 9                                                  | 3                                              | 15                                   |
|                                                                                                                                                                                                                                                                                                                                                                                                                                                                                                                                     | 3     | 12                                                 | 4                                              | 20                                   |
|                                                                                                                                                                                                                                                                                                                                                                                                                                                                                                                                     | 4     | 15                                                 | 5                                              | 25                                   |
|                                                                                                                                                                                                                                                                                                                                                                                                                                                                                                                                     | 5     | 18                                                 | 6                                              | 30                                   |
|                                                                                                                                                                                                                                                                                                                                                                                                                                                                                                                                     | 6     | 21                                                 | 7                                              | 35                                   |
|                                                                                                                                                                                                                                                                                                                                                                                                                                                                                                                                     | 7     | 24                                                 | 8                                              | 40                                   |
| 2                                                                                                                                                                                                                                                                                                                                                                                                                                                                                                                                   | 1     | 27                                                 | 9                                              | 45                                   |
|                                                                                                                                                                                                                                                                                                                                                                                                                                                                                                                                     | 2     | 30                                                 | 10                                             | 50                                   |
|                                                                                                                                                                                                                                                                                                                                                                                                                                                                                                                                     | 3     | 36                                                 | 12                                             | 60                                   |
|                                                                                                                                                                                                                                                                                                                                                                                                                                                                                                                                     | 4     | 42                                                 | 14                                             | 70                                   |
|                                                                                                                                                                                                                                                                                                                                                                                                                                                                                                                                     | 5     | 48                                                 | 16                                             | 80                                   |
|                                                                                                                                                                                                                                                                                                                                                                                                                                                                                                                                     | 6     | 54                                                 | 18                                             | 90                                   |
|                                                                                                                                                                                                                                                                                                                                                                                                                                                                                                                                     | 7     | 60                                                 | 20                                             | 100                                  |
| 3                                                                                                                                                                                                                                                                                                                                                                                                                                                                                                                                   | 1     | 66                                                 | 22                                             | 110                                  |
| Week 3 day 2 thru<br>Week 6 day 7<br>(maintenance dose)                                                                                                                                                                                                                                                                                                                                                                                                                                                                             |       | 72.7                                               | 24.2                                           | 121                                  |

**Table S3A. Open-Label Exposure to Glycine - Subject 5459: Planned Titration**

| <b>McLean Hospital Research Pharmacy</b>                                                                                                                                                                                                                                                                                                                                                                                                                                     |       |                                 |                             |                                  |
|------------------------------------------------------------------------------------------------------------------------------------------------------------------------------------------------------------------------------------------------------------------------------------------------------------------------------------------------------------------------------------------------------------------------------------------------------------------------------|-------|---------------------------------|-----------------------------|----------------------------------|
| <b>Dose Titration for Glycine Powder and Flavoring Additives - Open Label Phase</b>                                                                                                                                                                                                                                                                                                                                                                                          |       |                                 |                             |                                  |
| Titration Schedule for subject #5459, Open Label Phase, is based on a weight of 197 lbs (89.5 kg).                                                                                                                                                                                                                                                                                                                                                                           |       |                                 |                             |                                  |
| <b>Dose Titration:</b> Start with 6 gm/day on week one, day one, and increase by 4 gm/day (different titration rate than the double-blind phase) until a maintenance dose of 0.8 gm glycine per kg body weight (71.6 gm/day) is achieved.                                                                                                                                                                                                                                    |       |                                 |                             |                                  |
| <b>Note:</b> glycine is dosed TID                                                                                                                                                                                                                                                                                                                                                                                                                                            |       |                                 |                             |                                  |
| <b>Reconstitution Directions:</b> Subjects pour contents from flavoring bottle (B) into glycine bottle (A) and then add water to the fill line indicated on the glycine bottle (A). When mixed as instructed, the flavored glycine solution results in a final glycine concentration of 20% w/v (0.2 gm glycine/mL of solution). Volume contributed by the various powders has been factored into the calculation for the amount of water required to attain a 20% solution. |       |                                 |                             |                                  |
| <b>If a subject's dose needs to be changed for any reason,</b> reconstitution directions remain the same.                                                                                                                                                                                                                                                                                                                                                                    |       |                                 |                             |                                  |
| <b>The volume to be administered will need to be adjusted.</b> Below is the titration schedule showing gm/dose and volume/dose.                                                                                                                                                                                                                                                                                                                                              |       |                                 |                             |                                  |
| Week #                                                                                                                                                                                                                                                                                                                                                                                                                                                                       | Day # | Glycine Total Daily Dose gm/day | Glycine gm/dose (dosed TID) | Total Volume mL/Dose (dosed TID) |
| 1                                                                                                                                                                                                                                                                                                                                                                                                                                                                            | 1     | 6                               | 2                           | 10                               |
|                                                                                                                                                                                                                                                                                                                                                                                                                                                                              | 2     | 10                              | 3.3                         | 16.5                             |
|                                                                                                                                                                                                                                                                                                                                                                                                                                                                              | 3     | 14                              | 4.7                         | 23.5                             |
|                                                                                                                                                                                                                                                                                                                                                                                                                                                                              | 4     | 18                              | 6                           | 30                               |
|                                                                                                                                                                                                                                                                                                                                                                                                                                                                              | 5     | 22                              | 7.3                         | 36.5                             |
|                                                                                                                                                                                                                                                                                                                                                                                                                                                                              | 6     | 26                              | 8.7                         | 43.5                             |
|                                                                                                                                                                                                                                                                                                                                                                                                                                                                              | 7     | 30                              | 10                          | 50                               |
| 2                                                                                                                                                                                                                                                                                                                                                                                                                                                                            | 1     | 34                              | 11.3                        | 56.5                             |
|                                                                                                                                                                                                                                                                                                                                                                                                                                                                              | 2     | 38                              | 12.7                        | 63.5                             |
|                                                                                                                                                                                                                                                                                                                                                                                                                                                                              | 3     | 42                              | 14                          | 70                               |
|                                                                                                                                                                                                                                                                                                                                                                                                                                                                              | 4     | 46                              | 15.3                        | 76.5                             |
|                                                                                                                                                                                                                                                                                                                                                                                                                                                                              | 5     | 50                              | 16.7                        | 83.5                             |
|                                                                                                                                                                                                                                                                                                                                                                                                                                                                              | 6     | 54                              | 18                          | 90                               |
|                                                                                                                                                                                                                                                                                                                                                                                                                                                                              | 7     | 58                              | 19.3                        | 96.5                             |
| 3                                                                                                                                                                                                                                                                                                                                                                                                                                                                            | 1     | 62                              | 20.7                        | 103.5                            |
|                                                                                                                                                                                                                                                                                                                                                                                                                                                                              | 2     | 66                              | 22                          | 110                              |
|                                                                                                                                                                                                                                                                                                                                                                                                                                                                              | 3     | 70                              | 23.3                        | 116.5                            |
| Week 3 day 4 thru<br>Week 6 day 7<br>(maintenance dose)                                                                                                                                                                                                                                                                                                                                                                                                                      |       | 71.6                            | 23.9                        | 119.5                            |

**Table S4A. Double-Blind Exposure to Placebo - Subject 3363: Planned Titration**

| <b>McLean Hospital Research Pharmacy</b>                                                                                                                                                                                                                                                                                                                                                                                                                                                                                            |       |                                                    |                                                |                                      |
|-------------------------------------------------------------------------------------------------------------------------------------------------------------------------------------------------------------------------------------------------------------------------------------------------------------------------------------------------------------------------------------------------------------------------------------------------------------------------------------------------------------------------------------|-------|----------------------------------------------------|------------------------------------------------|--------------------------------------|
| <b>Dose Titration for Glycine/Palatinose 3:1 Mixture - Arm 1</b>                                                                                                                                                                                                                                                                                                                                                                                                                                                                    |       |                                                    |                                                |                                      |
| ("Palatinose 3:1 Mixture," also referred to "Palatinose," is the placebo for glycine)                                                                                                                                                                                                                                                                                                                                                                                                                                               |       |                                                    |                                                |                                      |
| Titration Schedule for subject #3363, Arm 1, is based on a weight of 228 lbs (103.6 kg).                                                                                                                                                                                                                                                                                                                                                                                                                                            |       |                                                    |                                                |                                      |
| <b>Dose Titration:</b> Start with 6 gm/day on day one and increase as noted below, until maintenance dose of 0.8 gm glycine/placebo per kg body weight (83 gm/day) is achieved.                                                                                                                                                                                                                                                                                                                                                     |       |                                                    |                                                |                                      |
| <b>Note:</b> glycine/placebo is dosed TID                                                                                                                                                                                                                                                                                                                                                                                                                                                                                           |       |                                                    |                                                |                                      |
| <b>Reconstitution Directions:</b> Subjects pour contents from flavoring bottle (B) into glycine/palatinose bottle (A) and then add water to the fill line indicated on the glycine/palatinose bottle (A). When mixed as instructed, the flavored Glycine/Patatinose solution results in a final glycine/palatinose concentration of 20% w/v (0.2 gm glycine/palatinose/mL of solution). Volume contributed by the various powders has been factored into the calculation for the amount of water required to attain a 20% solution. |       |                                                    |                                                |                                      |
| <b>If a subject's dose needs to be changed for any reason,</b> reconstitution directions remain the same.                                                                                                                                                                                                                                                                                                                                                                                                                           |       |                                                    |                                                |                                      |
| <b>The volume to be administered will need to be adjusted.</b> Below is the titration schedule showing gm/dose and volume/dose.                                                                                                                                                                                                                                                                                                                                                                                                     |       |                                                    |                                                |                                      |
| Week #                                                                                                                                                                                                                                                                                                                                                                                                                                                                                                                              | Day # | Glycine/Palatinose<br>Total Daily Dose<br>(gm/day) | Glycine/Palatinose<br>(gm/dose)<br>(dosed TID) | Total Volume(mL)/Dose<br>(dosed TID) |
| 1                                                                                                                                                                                                                                                                                                                                                                                                                                                                                                                                   | 1     | 6                                                  | 2                                              | 10                                   |
|                                                                                                                                                                                                                                                                                                                                                                                                                                                                                                                                     | 2     | 9                                                  | 3                                              | 15                                   |
|                                                                                                                                                                                                                                                                                                                                                                                                                                                                                                                                     | 3     | 12                                                 | 4                                              | 20                                   |
|                                                                                                                                                                                                                                                                                                                                                                                                                                                                                                                                     | 4     | 15                                                 | 5                                              | 25                                   |
|                                                                                                                                                                                                                                                                                                                                                                                                                                                                                                                                     | 5     | 18                                                 | 6                                              | 30                                   |
|                                                                                                                                                                                                                                                                                                                                                                                                                                                                                                                                     | 6     | 21                                                 | 7                                              | 35                                   |
|                                                                                                                                                                                                                                                                                                                                                                                                                                                                                                                                     | 7     | 24                                                 | 8                                              | 40                                   |
| 2                                                                                                                                                                                                                                                                                                                                                                                                                                                                                                                                   | 1     | 27                                                 | 9                                              | 45                                   |
|                                                                                                                                                                                                                                                                                                                                                                                                                                                                                                                                     | 2     | 30                                                 | 10                                             | 50                                   |
|                                                                                                                                                                                                                                                                                                                                                                                                                                                                                                                                     | 3     | 36                                                 | 12                                             | 60                                   |
|                                                                                                                                                                                                                                                                                                                                                                                                                                                                                                                                     | 4     | 42                                                 | 14                                             | 70                                   |
|                                                                                                                                                                                                                                                                                                                                                                                                                                                                                                                                     | 5     | 48                                                 | 16                                             | 80                                   |
|                                                                                                                                                                                                                                                                                                                                                                                                                                                                                                                                     | 6     | 54                                                 | 18                                             | 90                                   |
|                                                                                                                                                                                                                                                                                                                                                                                                                                                                                                                                     | 7     | 60                                                 | 20                                             | 100                                  |
| 3                                                                                                                                                                                                                                                                                                                                                                                                                                                                                                                                   | 1     | 66                                                 | 22                                             | 110                                  |
|                                                                                                                                                                                                                                                                                                                                                                                                                                                                                                                                     | 2     | 72                                                 | 24                                             | 120                                  |
|                                                                                                                                                                                                                                                                                                                                                                                                                                                                                                                                     | 3     | 78                                                 | 26                                             | 130                                  |
| Week 3, day 4 thru<br>Week 6 day 7<br>(maintenance dose)                                                                                                                                                                                                                                                                                                                                                                                                                                                                            |       | 83                                                 | 27.7                                           | 138.3                                |

**Table S5A. Double-Blind Exposure to Glycine - Subject 3363: Planned Titration**

| <b>McLean Hospital Research Pharmacy</b>                                                                                                                                                                                                                                                                                                                                                                                                                                                                                            |       |                                                    |                                                |                                       |
|-------------------------------------------------------------------------------------------------------------------------------------------------------------------------------------------------------------------------------------------------------------------------------------------------------------------------------------------------------------------------------------------------------------------------------------------------------------------------------------------------------------------------------------|-------|----------------------------------------------------|------------------------------------------------|---------------------------------------|
| <b>Dose Titration for Glycine/Palatinose 3:1 Mixture - Arm 2</b>                                                                                                                                                                                                                                                                                                                                                                                                                                                                    |       |                                                    |                                                |                                       |
| ("Palatinose 3:1 Mixture," also referred to "Palatinose," is the placebo for glycine)                                                                                                                                                                                                                                                                                                                                                                                                                                               |       |                                                    |                                                |                                       |
| Titration Schedule for subject #3363, Arm 2, is based on a weight of 219 lbs (99.5 kg).                                                                                                                                                                                                                                                                                                                                                                                                                                             |       |                                                    |                                                |                                       |
| <b>Dose Titration:</b> Start with 6 gm/day on week 11, day one, and increase as noted below, until maintenance dose of 0.8 gm glycine/placebo per kg body weight (79.6 gm/day) is achieved.                                                                                                                                                                                                                                                                                                                                         |       |                                                    |                                                |                                       |
| <b>Note:</b> glycine/placebo is dosed TID                                                                                                                                                                                                                                                                                                                                                                                                                                                                                           |       |                                                    |                                                |                                       |
| <b>Reconstitution Directions:</b> Subjects pour contents from flavoring bottle (B) into glycine/palatinose bottle (A) and then add water to the fill line indicated on the glycine/palatinose bottle (A). When mixed as instructed, the flavored Glycine/Palatinose solution results in a final glycine/palatinose concentration of 20% w/v (0.2 gm glycine/palatinose/mL of solution). Volume contributed by the various powders has been factored into the calculation for the amount of water required to attain a 20% solution. |       |                                                    |                                                |                                       |
| <b>If a subject's dose needs to be changed for any reason</b> , reconstitution directions remain the same.                                                                                                                                                                                                                                                                                                                                                                                                                          |       |                                                    |                                                |                                       |
| <b>The volume to be administered will need to be adjusted.</b> Below is the titration schedule showing gm/dose and volume/dose.                                                                                                                                                                                                                                                                                                                                                                                                     |       |                                                    |                                                |                                       |
| Week #                                                                                                                                                                                                                                                                                                                                                                                                                                                                                                                              | Day # | Glycine/Palatinose<br>Total Daily Dose<br>(gm/day) | Glycine/Palatinose<br>(gm/dose)<br>(dosed TID) | Total Volume (mL)/Dose<br>(dosed TID) |
| 1                                                                                                                                                                                                                                                                                                                                                                                                                                                                                                                                   | 1     | 6                                                  | 2                                              | 10                                    |
|                                                                                                                                                                                                                                                                                                                                                                                                                                                                                                                                     | 2     | 9                                                  | 3                                              | 15                                    |
|                                                                                                                                                                                                                                                                                                                                                                                                                                                                                                                                     | 3     | 12                                                 | 4                                              | 20                                    |
|                                                                                                                                                                                                                                                                                                                                                                                                                                                                                                                                     | 4     | 15                                                 | 5                                              | 25                                    |
|                                                                                                                                                                                                                                                                                                                                                                                                                                                                                                                                     | 5     | 18                                                 | 6                                              | 30                                    |
|                                                                                                                                                                                                                                                                                                                                                                                                                                                                                                                                     | 6     | 21                                                 | 7                                              | 35                                    |
|                                                                                                                                                                                                                                                                                                                                                                                                                                                                                                                                     | 7     | 24                                                 | 8                                              | 40                                    |
| 2                                                                                                                                                                                                                                                                                                                                                                                                                                                                                                                                   | 1     | 27                                                 | 9                                              | 45                                    |
|                                                                                                                                                                                                                                                                                                                                                                                                                                                                                                                                     | 2     | 30                                                 | 10                                             | 50                                    |
|                                                                                                                                                                                                                                                                                                                                                                                                                                                                                                                                     | 3     | 36                                                 | 12                                             | 60                                    |
|                                                                                                                                                                                                                                                                                                                                                                                                                                                                                                                                     | 4     | 42                                                 | 14                                             | 70                                    |
|                                                                                                                                                                                                                                                                                                                                                                                                                                                                                                                                     | 5     | 48                                                 | 16                                             | 80                                    |
|                                                                                                                                                                                                                                                                                                                                                                                                                                                                                                                                     | 6     | 54                                                 | 18                                             | 90                                    |
|                                                                                                                                                                                                                                                                                                                                                                                                                                                                                                                                     | 7     | 60                                                 | 20                                             | 100                                   |
| 3                                                                                                                                                                                                                                                                                                                                                                                                                                                                                                                                   | 1     | 66                                                 | 22                                             | 110                                   |
|                                                                                                                                                                                                                                                                                                                                                                                                                                                                                                                                     | 2     | 72                                                 | 24                                             | 120                                   |
| Week 3 day 3 thru<br>Week 6 day 7<br>(maintenance dose)                                                                                                                                                                                                                                                                                                                                                                                                                                                                             |       | 79.6                                               | 26.5                                           | 132.5                                 |

**Table S6A. Open-Label Exposure to Glycine - Subject 3363: Planned Titration**

| <b>McLean Hospital Research Pharmacy</b>                                                                                                                                                                                                                                                                                                                                                                                                                                     |       |                                 |                             |                                  |
|------------------------------------------------------------------------------------------------------------------------------------------------------------------------------------------------------------------------------------------------------------------------------------------------------------------------------------------------------------------------------------------------------------------------------------------------------------------------------|-------|---------------------------------|-----------------------------|----------------------------------|
| <b>Dose Titration for Glycine Powder and Flavoring Additives - Open Label Phase</b>                                                                                                                                                                                                                                                                                                                                                                                          |       |                                 |                             |                                  |
| Titration Schedule for subject #3363, Open Label Phase, is based on a weight of 225 lbs (102.3 kg).                                                                                                                                                                                                                                                                                                                                                                          |       |                                 |                             |                                  |
| <b>Dose Titration:</b> Start with 6 gm/day on week one, day one, and increase by 4 gm/day (different titration rate than the double-blind phase) until a maintenance dose of 0.8 gm glycine per kg body weight (81.8 gm/day) is achieved.                                                                                                                                                                                                                                    |       |                                 |                             |                                  |
| <b>Note:</b> glycine is dosed TID                                                                                                                                                                                                                                                                                                                                                                                                                                            |       |                                 |                             |                                  |
| <b>Reconstitution Directions:</b> Subjects pour contents from flavoring bottle (B) into glycine bottle (A) and then add water to the fill line indicated on the glycine bottle (A). When mixed as instructed, the flavored glycine solution results in a final glycine concentration of 20% w/v (0.2 gm glycine/mL of solution). Volume contributed by the various powders has been factored into the calculation for the amount of water required to attain a 20% solution. |       |                                 |                             |                                  |
| <b>If a subject's dose needs to be changed for any reason,</b> reconstitution directions remain the same.                                                                                                                                                                                                                                                                                                                                                                    |       |                                 |                             |                                  |
| <b>The volume to be administered will need to be adjusted.</b> Below is the titration schedule showing gm/dose and volume/dose.                                                                                                                                                                                                                                                                                                                                              |       |                                 |                             |                                  |
| Week #                                                                                                                                                                                                                                                                                                                                                                                                                                                                       | Day # | Glycine Total Daily Dose gm/day | Glycine gm/dose (dosed TID) | Total Volume mL/Dose (dosed TID) |
| 1                                                                                                                                                                                                                                                                                                                                                                                                                                                                            | 1     | 6                               | 2                           | 10                               |
|                                                                                                                                                                                                                                                                                                                                                                                                                                                                              | 2     | 10                              | 3.3                         | 16.5                             |
|                                                                                                                                                                                                                                                                                                                                                                                                                                                                              | 3     | 14                              | 4.7                         | 23.5                             |
|                                                                                                                                                                                                                                                                                                                                                                                                                                                                              | 4     | 18                              | 6                           | 30                               |
|                                                                                                                                                                                                                                                                                                                                                                                                                                                                              | 5     | 22                              | 7.3                         | 36.5                             |
|                                                                                                                                                                                                                                                                                                                                                                                                                                                                              | 6     | 26                              | 8.7                         | 43.5                             |
|                                                                                                                                                                                                                                                                                                                                                                                                                                                                              | 7     | 30                              | 10                          | 50                               |
| 2                                                                                                                                                                                                                                                                                                                                                                                                                                                                            | 1     | 34                              | 11.3                        | 56.5                             |
|                                                                                                                                                                                                                                                                                                                                                                                                                                                                              | 2     | 38                              | 12.7                        | 63.5                             |
|                                                                                                                                                                                                                                                                                                                                                                                                                                                                              | 3     | 42                              | 14                          | 70                               |
|                                                                                                                                                                                                                                                                                                                                                                                                                                                                              | 4     | 46                              | 15.3                        | 76.5                             |
|                                                                                                                                                                                                                                                                                                                                                                                                                                                                              | 5     | 50                              | 16.7                        | 83.5                             |
|                                                                                                                                                                                                                                                                                                                                                                                                                                                                              | 6     | 54                              | 18                          | 90                               |
|                                                                                                                                                                                                                                                                                                                                                                                                                                                                              | 7     | 58                              | 19.3                        | 96.5                             |
| 3                                                                                                                                                                                                                                                                                                                                                                                                                                                                            | 1     | 62                              | 20.7                        | 103.5                            |
|                                                                                                                                                                                                                                                                                                                                                                                                                                                                              | 2     | 66                              | 22                          | 110                              |
|                                                                                                                                                                                                                                                                                                                                                                                                                                                                              | 3     | 70                              | 23.3                        | 116.5                            |
|                                                                                                                                                                                                                                                                                                                                                                                                                                                                              | 4     | 74                              | 24.7                        | 123.5                            |
|                                                                                                                                                                                                                                                                                                                                                                                                                                                                              | 5     | 78                              | 26                          | 130                              |
| Week 3 day 6 thru<br>Week 6 day 7<br>(maintenance dose)                                                                                                                                                                                                                                                                                                                                                                                                                      |       | 81.8                            | 27.3                        | 136.5                            |

**Table S7A. Open-Label Exposure to Chronic Glycine - Subject 3363: Planned Titration**


---

**Investigator's Copy:** Maintenance dose for Subject #3363 of 28.8 gm/dose (86.5 gm/day) based on body wt. of 238 lbs (108.1 kg).

**Important Note:**

- Glycine powder & distilled water are to be measured & mixed, making doses of Glycine 20% solution, which will be taken 3 times/day
- The **Glycine powder** must be **loosened in its jar before** it is measured (see instructions below)
- **Glycine powder must be measured lightly with the measuring spoons provided. Do not pack the powder into the measuring spoons**
- The amount of Glycine powder/measuring spoon is specific for spoons filled lightly with loosened Glycine powder (**not packed**)
- Measure distilled water with the graduated cylinder provided
- Do not mix Glycine solutions ahead of time. Prepare each dose at the time of use
- The total daily dose of Glycine will be increased by approx 4gm/day (**1.3 gm/dose**) to a maintenance dose of **0.8 gm glycine/kg** body wt

**Instructions- Preparing Doses of Glycine 20% Solution**

- Check that the lid is secured on the jar of Glycine powder. Gently roll/rotate jar several times *to loosen the powder before measuring*
1. Refer to the titration schedule for HOW MANY & WHICH SIZE measuring spoons are needed to measure each dose of Glycine powder
  2. Lightly fill the first measuring spoon with the Glycine powder (*do not pack powder into the spoon*)
  3. Level the measuring spoon with a straight edge over the jar, so the excess powder falls back into the jar
  4. Transfer the Glycine powder from the measuring spoon into the bottle provided
  5. Measure additional spoonful(s) of Glycine Powder (per titration) until the full dose has been measured & placed in the bottle provided
  6. Measure the amount of distilled water needed per dose using the graduated cylinder provided (see titration for amount of water/dose)
  7. Pour the measured amount of water into the bottle containing the measured dose of Glycine powder
  8. Cap bottle & shake for several minutes to dissolve to produce a 20% Glycine solution in the amount needed for the dose
  9. Flavor solution to taste using the TrueCitrus® Lemon and Lime flavoring packets provided- Cap bottle & shake to dissolve
  10. (Note: For the plain TrueLemon and TrueLime flavors, 1 packet = 0.8 gm, which is approximately 1/4 teaspoonful)
  11. Drink the entire dose slowly, over a 15 minute period
-



Table S7A. Open-Label Exposure to Chronic Glycine - Subject 3363: Planned Titration

| Week # | Day # | Glycine Gm Per Dose (3 X/day) | Glycine Powder- Amount/Dose (TID) |     |                      | Glycine (Gm per Spoonful) | +     | Water Amt to Add/ Dose (mL) | =     | Glycine 20% Soln Final Volume/Dose (mL) |
|--------|-------|-------------------------------|-----------------------------------|-----|----------------------|---------------------------|-------|-----------------------------|-------|-----------------------------------------|
|        |       |                               | # of Spoonfuls                    | X   | Measuring Spoon Size |                           |       |                             |       |                                         |
| 1      | 1     | 1.8                           | One                               | X   | 1/2                  | teaspoonful (1.8 gm)      | +     | 8 mL                        | =     | 9 mL                                    |
|        | 2     | 3                             | One                               | X   | 3/4                  | teaspoonful (3 gm)        | +     | 13 mL                       | =     | 15 mL                                   |
|        | 3     | 5                             | One                               | X   | 1                    | teaspoonful (5 gm)        | +     | 22 mL                       | =     | 25 mL                                   |
|        | 4     | 6.1                           | One                               | X   | 1                    | teaspoonful (5 gm)        | +     | 27 mL                       | =     | 30.5 mL                                 |
|        |       |                               | One                               | X   | 1/4                  | teaspoonful (1.1 gm)      |       |                             |       |                                         |
|        | 5     | 6.8                           | One                               | X   | 1                    | teaspoonful (5 gm)        | +     | 30 mL                       | =     | 34 mL                                   |
|        |       |                               | One                               | X   | 1/2                  | teaspoonful (1.8 gm)      |       |                             |       |                                         |
| 6      | 8     | One                           | X                                 | 1   | teaspoonful (5 gm)   | +                         | 35 mL | =                           | 40 mL |                                         |
|        |       | One                           | X                                 | 3/4 | teaspoonful (3 gm)   |                           |       |                             |       |                                         |
| 7      | 10    | TWO                           | X                                 | 1   | teaspoonful (5 gm)   | +                         | 44 mL | =                           | 50 mL |                                         |
| 2      | 1     | 11.1                          | TWO                               | X   | 1                    | teaspoonful (5 gm)        | +     | 49 mL                       | =     | 55.5 mL                                 |
|        |       |                               | One                               | X   | 1/4                  | teaspoonful (1.1 gm)      |       |                             |       |                                         |
|        | 2     | 11.8                          | TWO                               | X   | 1                    | teaspoonful (5 gm)        | +     | 52 mL                       | =     | 59 mL                                   |
|        |       |                               | One                               | X   | 1/2                  | teaspoonful (1.8 gm)      |       |                             |       |                                         |
|        | 3     | 13                            | One                               | X   | 1                    | Tablespoon (13 gm)        | +     | 57 mL                       | =     | 65 mL                                   |
|        |       |                               | One                               | X   | 1                    | Tablespoon (13 gm)        |       |                             |       |                                         |
|        | 4     | 14.1                          | One                               | X   | 1/4                  | teaspoonful (1.1 gm)      | +     | 62 mL                       | =     | 70.5 mL                                 |
| One    |       |                               | X                                 | 1   | Tablespoon (13 gm)   |                           |       |                             |       |                                         |
| 5      | 15.4  | One                           | X                                 | 1/2 | teaspoonful (1.8 gm) | +                         | 68 mL | =                           | 77 mL |                                         |
|        |       | One                           | X                                 | 1/8 | teaspoonful (0.6 gm) |                           |       |                             |       |                                         |
| 6      | 16    | One                           | X                                 | 1   | Tablespoon (13 gm)   | +                         | 71 mL | =                           | 80 mL |                                         |
|        |       | One                           | X                                 | 3/4 | teaspoonful (3 gm)   |                           |       |                             |       |                                         |
| 7      | 18    | One                           | X                                 | 1   | Tablespoon (13 gm)   | +                         | 79 mL | =                           | 90 mL |                                         |
|        |       | One                           | X                                 | 1   | teaspoonful (5 gm)   |                           |       |                             |       |                                         |

Table S7A. Open-Label Exposure to Chronic Glycine - Subject 3363: Planned Titration

| Week # | Day # | Glycine Gm Per Dose (3 X/day) | Glycine Powder- Amount/Dose (TID) |     |                      | Glycine (Gm per Spoonful) | +      | Water Amt to Add/ Dose (mL) | =        | Glycine 20% Soln Final Volume/Dose (mL) |
|--------|-------|-------------------------------|-----------------------------------|-----|----------------------|---------------------------|--------|-----------------------------|----------|-----------------------------------------|
|        |       |                               | # of Spoonfuls                    | X   | Measuring Spoon Size |                           |        |                             |          |                                         |
| 3      | 1     | 19.1                          | One                               | X   | 1                    | Tablespoon (13 gm)        | +      | 84 mL                       | =        | 95.5 mL                                 |
|        |       |                               | One                               | X   | 1                    | teaspoonful (5 gm)        |        |                             |          |                                         |
|        |       |                               | One                               | X   | 1/4                  | teaspoonful (1.1 gm)      |        |                             |          |                                         |
|        | 2     | 19.8                          | One                               | X   | 1                    | Tablespoon (13 gm)        | +      | 87 mL                       | =        | 99 mL                                   |
|        |       |                               | One                               | X   | 1                    | teaspoonful (5 gm)        |        |                             |          |                                         |
|        |       |                               | One                               | X   | 1/2                  | teaspoonful (1.8 gm)      |        |                             |          |                                         |
|        | 3     | 21                            | One                               | X   | 1                    | Tablespoon (13 gm)        | +      | 93 mL                       | =        | 105 mL                                  |
|        |       |                               | One                               | X   | 1                    | teaspoonful (5 gm)        |        |                             |          |                                         |
|        |       |                               | One                               | X   | 3/4                  | teaspoonful (3 gm)        |        |                             |          |                                         |
|        | 4     | 21.6                          | One                               | X   | 1                    | Tablespoon (13 gm)        | +      | 95 mL                       | =        | 108 mL                                  |
|        |       |                               | One                               | X   | 1                    | teaspoonful (5 gm)        |        |                             |          |                                         |
|        |       |                               | One                               | X   | 3/4                  | teaspoonful (3 gm)        |        |                             |          |                                         |
| 5      | 23.6  | One                           | X                                 | 1   | Tablespoon (13 gm)   | +                         | 104 mL | =                           | 118 mL   |                                         |
|        |       | TWO                           | X                                 | 1   | teaspoonful (5 gm)   |                           |        |                             |          |                                         |
|        |       | One                           | X                                 | 1/8 | teaspoonful (0.6 gm) |                           |        |                             |          |                                         |
| 6      | 24.1  | One                           | X                                 | 1   | Tablespoon (13 gm)   | +                         | 106 mL | =                           | 120.5 mL |                                         |
|        |       | TWO                           | X                                 | 1   | teaspoonful (5 gm)   |                           |        |                             |          |                                         |
|        |       | One                           | X                                 | 1/4 | teaspoonful (1.1 gm) |                           |        |                             |          |                                         |
| 7      | 24.8  | One                           | X                                 | 1   | Tablespoon (13 gm)   | +                         | 109 mL | =                           | 124 mL   |                                         |
|        |       | TWO                           | X                                 | 1   | teaspoonful (5 gm)   |                           |        |                             |          |                                         |
|        |       | One                           | X                                 | 1/2 | teaspoonful (1.8 gm) |                           |        |                             |          |                                         |
| 4      | 1     | 26                            | TWO                               | X   | 1                    | Tablespoon (13 gm)        | +      | 115 mL                      | =        | 130 mL                                  |
|        | 2     | 27.1                          | TWO                               | X   | 1                    | Tablespoon (13 gm)        | +      | 120 mL                      | =        | 135.5 mL                                |

**Table S7A. Open-Label Exposure to Chronic Glycine - Subject 3363: Planned Titration**

| Week #                           | Day # | Glycine Gm Per Dose (3 X/day) | Glycine Powder- Amount/Dose (TID) |   |                      | Glycine (Gm per Spoonful) | + | Water Amt to Add/ Dose (mL) | = | Glycine 20% Soln Final Volume/Dose (mL) |
|----------------------------------|-------|-------------------------------|-----------------------------------|---|----------------------|---------------------------|---|-----------------------------|---|-----------------------------------------|
|                                  |       |                               | # of Spoonfuls                    | X | Measuring Spoon Size |                           |   |                             |   |                                         |
|                                  |       |                               | One                               | X | 1/4 teaspoonful      | (1.1 gm)                  |   |                             |   |                                         |
|                                  | 3     | 28.2                          | TWO                               | X | 1 Tablespoon         | (13 gm)                   |   |                             |   |                                         |
|                                  |       |                               | TWO                               | X | 1/4 teaspoonful      | (1.1 gm)                  | + | 124 mL                      | = | 141 mL                                  |
| Week 4, Day 4 & Daily thereafter |       | 28.8                          | TWO                               | X | 1 Tablespoon         | (13 gm)                   |   |                             |   |                                         |
|                                  |       |                               | TWO                               | X | 1/4 teaspoonful      | (1.1 gm)                  | + | 127 mL                      | = | 144 mL                                  |
|                                  |       |                               | One                               | X | 1/8 teaspoonful      | (0.6 gm)                  |   |                             |   |                                         |

**Table S7A. Open-Label Exposure to Chronic Glycine - Subject 3363: Planned Titration****Investigator's Copy:** Information for calculating amounts of glycine powder and distilled water

| <b>Measuring Spoon Capacity Chart</b>                                                  |                      |                                                                          |
|----------------------------------------------------------------------------------------|----------------------|--------------------------------------------------------------------------|
| <b>Measuring Spoons &amp; Sizes</b>                                                    |                      | <b>Spoon Capacity<sup>1</sup></b>                                        |
| For measuring doses of Glycine powder,<br>according to weight based titration schedule |                      | In grams of Glycine powder<br>(for lightly measured, level<br>spoonfuls) |
|       | <b>1/8 teaspoon</b>  | 0.6 gm                                                                   |
|                                                                                        | <b>1/4 teaspoon</b>  | 1.1 gm                                                                   |
|                                                                                        | <b>1/2 teaspoon</b>  | 1.8 gm                                                                   |
|                                                                                        | <b>3/4 teaspoon</b>  | 3 gm                                                                     |
|                                                                                        | <b>1 teaspoon</b>    | 5 gm                                                                     |
|                                                                                        | <b>1 Tablespoon</b>  | 13 gm                                                                    |
|                                                                                        | <b>2 Tablespoons</b> | 30.4 gm                                                                  |
| Measuring Spoon Set<br>(Endurance®18/10, Stainless Steel)                              |                      |                                                                          |
| Coffee Scoop- Stainless Steel<br>(Norpro®5537)                                         |                      |                                                                          |

<sup>1</sup> Measuring Spoon capacities are specific for Glycine powder USP, mfg by Letco Medical, NDC# 62991-2730-03, when measured as directed

Displacement Volume of Glycine Powder in Solution = 0.59 mL/Gm glycine powder  
(Specific to Glycine Powder, USP, NDC# 62991-2730-03, Manufactured by Letco Medical)

### **Glycine & Water Calculations**

1. Assign glycine doses for each day of the titration schedule

Glycine doses for the titration schedule were chosen based on determining reasonable dose increases that could be achieved with the various capacities of the measuring spoons

2. Calculate the total volume that would create a final glycine solution of 20%

**Final Volume (mL)** per dose of Glycine 20% Soln = # gm Glycine per dose ÷ 0.2

3. Calculate the amount of water that must be added to each dose of glycine powder to produce the correct final volume as calculated in # 2 above.

**Amt of Water (mL)** per dose = Final Volume of Glycine 20% Soln (mL) - (# Gm Glycine/dose)(0.59 gm/mL\*)

\*0.59 gm/mL is the displacement volume of Glycine powder in solution

**Table S8A. Open-Label Exposure to Chronic Glycine - Subject 5459: Planned Titration**


---

**Investigator's Copy:** Maintenance dose for Subject #5459 of 26 gm/dose (78 gm/day) based on body wt. of 212 lbs (96.4 kg).

**Important Note:**

- Glycine powder & distilled water are to be measured & mixed, making doses of Glycine 20% solution, which will be taken 3 times/day
- The **Glycine powder** must be **loosened in its jar before** it is measured (see instructions below)
- **Glycine powder must be measured lightly with the measuring spoons provided. Do not pack the powder into the measuring spoons**
- The amount of Glycine powder/measuring spoon is specific for spoons filled lightly with loosened Glycine powder (**not packed**)
- Measure distilled water with the graduated cylinder provided
- Do not mix Glycine solutions ahead of time. Prepare each dose at the time of use
- The total daily dose of Glycine will be increased by approx 4 gm/day (**1.3 gm/dose**) to a maintenance dose of **0.8 gm glycine/kg** body wt

**Instructions- Preparing Doses of Glycine 20% Solution**

- Check that the lid is secured on the jar of Glycine powder. Gently roll/rotate jar several times *to loosen the powder before measuring*
1. Refer to the titration schedule for HOW MANY & WHICH SIZE measuring spoons are needed to measure each dose of Glycine powder
  2. Lightly fill the first measuring spoon with the Glycine powder (*do not pack powder into the spoon*)
  3. Level the measuring spoon with a straight edge over the jar, so the excess powder falls back into the jar
  4. Transfer the Glycine powder from the measuring spoon into the bottle provided
  5. Measure additional spoonful(s) of Glycine Powder (per titration) until the full dose has been measured & placed in the bottle provided
  6. Measure the amount of distilled water needed per dose using the graduated cylinder provided (see titration for amount of water/dose)
  7. Pour the measured amount of water into the bottle containing the measured dose of Glycine powder
  8. Cap bottle & shake for several minutes to dissolve to produce a 20% Glycine solution in the amount needed for the dose
  9. Flavor solution to taste using the TrueCitrus® Lemon and Lime flavoring packets provided- Cap bottle & shake to dissolve
  10. (Note: For the plain TrueLemon and TrueLime flavors, 1 packet = 0.8 gm, which is approximately 1/4 teaspoonful)
  11. Drink the entire dose slowly, over a 15 minute period
-

Table S8A. Open-Label Exposure to Chronic Glycine - Subject 5459: Planned Titration

| Week # | Day # | Glycine Gm Per Dose (3 X/day) | Glycine Powder- Amount/Dose (TID) |     |                      | Glycine (Gm per Spoonful) | +     | Water Amt to Add/ Dose (mL) | =     | Glycine 20% Soln Final Volume/Dose (mL) |
|--------|-------|-------------------------------|-----------------------------------|-----|----------------------|---------------------------|-------|-----------------------------|-------|-----------------------------------------|
|        |       |                               | # of Spoonfuls                    | X   | Measuring Spoon Size |                           |       |                             |       |                                         |
| 1      | 1     | 1.8                           | One                               | X   | 1/2                  | teaspoonful (1.8 gm)      | +     | 8 mL                        | =     | 9 mL                                    |
|        | 2     | 3                             | One                               | X   | 3/4                  | teaspoonful (3 gm)        | +     | 13 mL                       | =     | 15 mL                                   |
|        | 3     | 5                             | One                               | X   | 1                    | teaspoonful (5 gm)        | +     | 22 mL                       | =     | 25 mL                                   |
|        | 4     | 6.1                           | One                               | X   | 1                    | teaspoonful (5 gm)        | +     | 27 mL                       | =     | 30.5 mL                                 |
|        |       |                               | One                               | X   | 1/4                  | teaspoonful (1.1 gm)      |       |                             |       |                                         |
|        | 5     | 6.8                           | One                               | X   | 1                    | teaspoonful (5 gm)        | +     | 30 mL                       | =     | 34 mL                                   |
|        |       |                               | One                               | X   | 1/2                  | teaspoonful (1.8 gm)      |       |                             |       |                                         |
| 6      | 8     | One                           | X                                 | 1   | teaspoonful (5 gm)   | +                         | 35 mL | =                           | 40 mL |                                         |
|        |       | One                           | X                                 | 3/4 | teaspoonful (3 gm)   |                           |       |                             |       |                                         |
| 7      | 10    | TWO                           | X                                 | 1   | teaspoonful (5 gm)   | +                         | 44 mL | =                           | 50 mL |                                         |
| 2      | 1     | 11.1                          | TWO                               | X   | 1                    | teaspoonful (5 gm)        | +     | 49 mL                       | =     | 55.5 mL                                 |
|        |       |                               | One                               | X   | 1/4                  | teaspoonful (1.1 gm)      |       |                             |       |                                         |
|        | 2     | 11.8                          | TWO                               | X   | 1                    | teaspoonful (5 gm)        | +     | 52 mL                       | =     | 59 mL                                   |
|        |       |                               | One                               | X   | 1/2                  | teaspoonful (1.8 gm)      |       |                             |       |                                         |
|        | 3     | 13                            | One                               | X   | 1                    | Tablespoon (13 gm)        | +     | 57 mL                       | =     | 65 mL                                   |
|        |       |                               | One                               | X   | 1                    | Tablespoon (13 gm)        |       |                             |       |                                         |
|        | 4     | 14.1                          | One                               | X   | 1/4                  | teaspoonful (1.1 gm)      | +     | 62 mL                       | =     | 70.5 mL                                 |
| One    |       |                               | X                                 | 1   | Tablespoon (13 gm)   |                           |       |                             |       |                                         |
| 5      | 15.4  | One                           | X                                 | 1/2 | teaspoonful (1.8 gm) | +                         | 68 mL | =                           | 77 mL |                                         |
|        |       | One                           | X                                 | 1/8 | teaspoonful (0.6 gm) |                           |       |                             |       |                                         |
| 6      | 16    | One                           | X                                 | 1   | Tablespoon (13 gm)   | +                         | 71 mL | =                           | 80 mL |                                         |
|        |       | One                           | X                                 | 3/4 | teaspoonful (3 gm)   |                           |       |                             |       |                                         |
| 7      | 18    | One                           | X                                 | 1   | Tablespoon (13 gm)   | +                         | 79 mL | =                           | 90 mL |                                         |
|        |       | One                           | X                                 | 1   | teaspoonful (5 gm)   |                           |       |                             |       |                                         |

Table S8A. Open-Label Exposure to Chronic Glycine - Subject 5459: Planned Titration

| Week # | Day # | Glycine Gm Per Dose (3 X/day) | Glycine Powder- Amount/Dose (TID) |     |                      | Glycine (Gm per Spoonful) | +      | Water Amt to Add/ Dose (mL) | =        | Glycine 20% Soln Final Volume/Dose (mL) |
|--------|-------|-------------------------------|-----------------------------------|-----|----------------------|---------------------------|--------|-----------------------------|----------|-----------------------------------------|
|        |       |                               | # of Spoonfuls                    | X   | Measuring Spoon Size |                           |        |                             |          |                                         |
| 3      | 1     | 19.1                          | One                               | X   | 1                    | Tablespoon (13 gm)        | +      | 84 mL                       | =        | 95.5 mL                                 |
|        |       |                               | One                               | X   | 1                    | teaspoonful (5 gm)        |        |                             |          |                                         |
|        |       |                               | One                               | X   | 1/4                  | teaspoonful (1.1 gm)      |        |                             |          |                                         |
|        | 2     | 19.8                          | One                               | X   | 1                    | Tablespoon (13 gm)        | +      | 87 mL                       | =        | 99 mL                                   |
|        |       |                               | One                               | X   | 1                    | teaspoonful (5 gm)        |        |                             |          |                                         |
|        |       |                               | One                               | X   | 1/2                  | teaspoonful (1.8 gm)      |        |                             |          |                                         |
|        | 3     | 21                            | One                               | X   | 1                    | Tablespoon (13 gm)        | +      | 93 mL                       | =        | 105 mL                                  |
|        |       |                               | One                               | X   | 1                    | teaspoonful (5 gm)        |        |                             |          |                                         |
|        |       |                               | One                               | X   | 3/4                  | teaspoonful (3 gm)        |        |                             |          |                                         |
|        | 4     | 21.6                          | One                               | X   | 1                    | Tablespoon (13 gm)        | +      | 95 mL                       | =        | 108 mL                                  |
|        |       |                               | One                               | X   | 1                    | teaspoonful (5 gm)        |        |                             |          |                                         |
|        |       |                               | One                               | X   | 3/4                  | teaspoonful (3 gm)        |        |                             |          |                                         |
| 5      | 23.6  | One                           | X                                 | 1   | Tablespoon (13 gm)   | +                         | 104 mL | =                           | 118 mL   |                                         |
|        |       | TWO                           | X                                 | 1   | teaspoonful (5 gm)   |                           |        |                             |          |                                         |
|        |       | One                           | X                                 | 1/8 | teaspoonful (0.6 gm) |                           |        |                             |          |                                         |
| 6      | 24.1  | One                           | X                                 | 1   | Tablespoon (13 gm)   | +                         | 106 mL | =                           | 120.5 mL |                                         |
|        |       | TWO                           | X                                 | 1   | teaspoonful (5 gm)   |                           |        |                             |          |                                         |
|        |       | One                           | X                                 | 1/4 | teaspoonful (1.1 gm) |                           |        |                             |          |                                         |
| 7      | 24.8  | One                           | X                                 | 1   | Tablespoon (13 gm)   | +                         | 109 mL | =                           | 124 mL   |                                         |
|        |       | TWO                           | X                                 | 1   | teaspoonful (5 gm)   |                           |        |                             |          |                                         |
|        |       | One                           | X                                 | 1/2 | teaspoonful (1.8 gm) |                           |        |                             |          |                                         |
| 4      | 1     | 26                            | TWO                               | X   | 1                    | Tablespoon (13 gm)        | +      | 115 mL                      | =        | 130 mL                                  |
|        | 2     | 27.1                          | TWO                               | X   | 1                    | Tablespoon (13 gm)        | +      | 119.5 mL                    | =        | 135.5 mL                                |

**Table S8A. Open-Label Exposure to Chronic Glycine - Subject 5459: Planned Titration**

| Week #                           | Day # | Glycine Gm Per Dose (3 X/day) | Glycine Powder- Amount/Dose (TID) |   |                      | Glycine (Gm per Spoonful) | + | Water Amt to Add/ Dose (mL) | = | Glycine 20% Soln Final Volume/Dose (mL) |
|----------------------------------|-------|-------------------------------|-----------------------------------|---|----------------------|---------------------------|---|-----------------------------|---|-----------------------------------------|
|                                  |       |                               | # of Spoonfuls                    | X | Measuring Spoon Size |                           |   |                             |   |                                         |
|                                  |       |                               | One                               | X | 1/4 teaspoonful      | (1.1 gm)                  |   |                             |   |                                         |
|                                  | 3     | 28.2                          | TWO                               | X | 1 Tablespoon         | (13 gm)                   |   |                             |   |                                         |
|                                  |       |                               | TWO                               | X | 1/4 teaspoonful      | (1.1 gm)                  | + | 124.4 mL                    | = | 141 mL                                  |
| Week 4, Day 1 & Daily thereafter |       | 26                            | TWO                               | X | 1 Tablespoon         | (13 gm)                   | + | 115 mL                      | = | 130 mL                                  |



**Table S8A. Open-Label Exposure to Chronic Glycine - Subject 5459: Planned Titration****Investigator's Copy:** Information for calculating amounts of glycine powder and distilled water

| <b>Measuring Spoon Capacity Chart</b>                                                  |                      |                                                                          |
|----------------------------------------------------------------------------------------|----------------------|--------------------------------------------------------------------------|
| <b>Measuring Spoons &amp; Sizes</b>                                                    |                      | <b>Spoon Capacity<sup>1</sup></b>                                        |
| For measuring doses of Glycine powder,<br>according to weight based titration schedule |                      | In grams of Glycine powder<br>(for lightly measured, level<br>spoonfuls) |
|       | <b>1/8 teaspoon</b>  | 0.6 gm                                                                   |
|                                                                                        | <b>1/4 teaspoon</b>  | 1.1 gm                                                                   |
|                                                                                        | <b>1/2 teaspoon</b>  | 1.8 gm                                                                   |
|                                                                                        | <b>3/4 teaspoon</b>  | 3 gm                                                                     |
|                                                                                        | <b>1 teaspoon</b>    | 5 gm                                                                     |
|                                                                                        | <b>1 Tablespoon</b>  | 13 gm                                                                    |
|                                                                                        | <b>2 Tablespoons</b> | 30.4 gm                                                                  |
| Measuring Spoon Set<br>(Endurance®18/10, Stainless Steel)                              |                      |                                                                          |
| Coffee Scoop- Stainless Steel<br>(Norpro®5537)                                         |                      |                                                                          |

<sup>1</sup> Measuring Spoon capacities are specific for Glycine powder USP, mfg by Letco Medical, NDC# 62991-2730-03, when measured as directed

Displacement Volume of Glycine Powder in Solution = 0.59 mL/Gm glycine powder  
(Specific to Glycine Powder, USP, NDC# 62991-2730-03, Manufactured by Letco Medical)

### Glycine & Water Calculations

1. Assign glycine doses for each day of the titration schedule

Glycine doses for the titration schedule were chosen based on determining reasonable dose increases that could be achieved with the various capacities of the measuring spoons

2. Calculate the total volume that would create a final glycine solution of 20%

**Final Volume (mL)** per dose of Glycine 20% Soln = # gm Glycine per dose ÷ 0.2

3. Calculate the amount of water that must be added to each dose of glycine powder to produce the correct final volume as calculated in # 2 above.

**Amt of Water (mL)** per dose = Final Volume of Glycine 20% Soln (mL) - (# Gm Glycine/dose)(0.59 gm/mL\*)

\*0.59 gm/mL is the displacement volume of Glycine powder in solution

**Figure S1:** Comparative Genome Hybridization Array (aCGH) Analysis showing the presence of the duplicated and triplicated regions in the two carriers but not in the proband's siblings, father or maternal grandparents. Absence of the copy number variant (CNV) in the mother's siblings was verified but is not shown. Courtesy of J Sebat, S McCarthy, and D Malhotra.

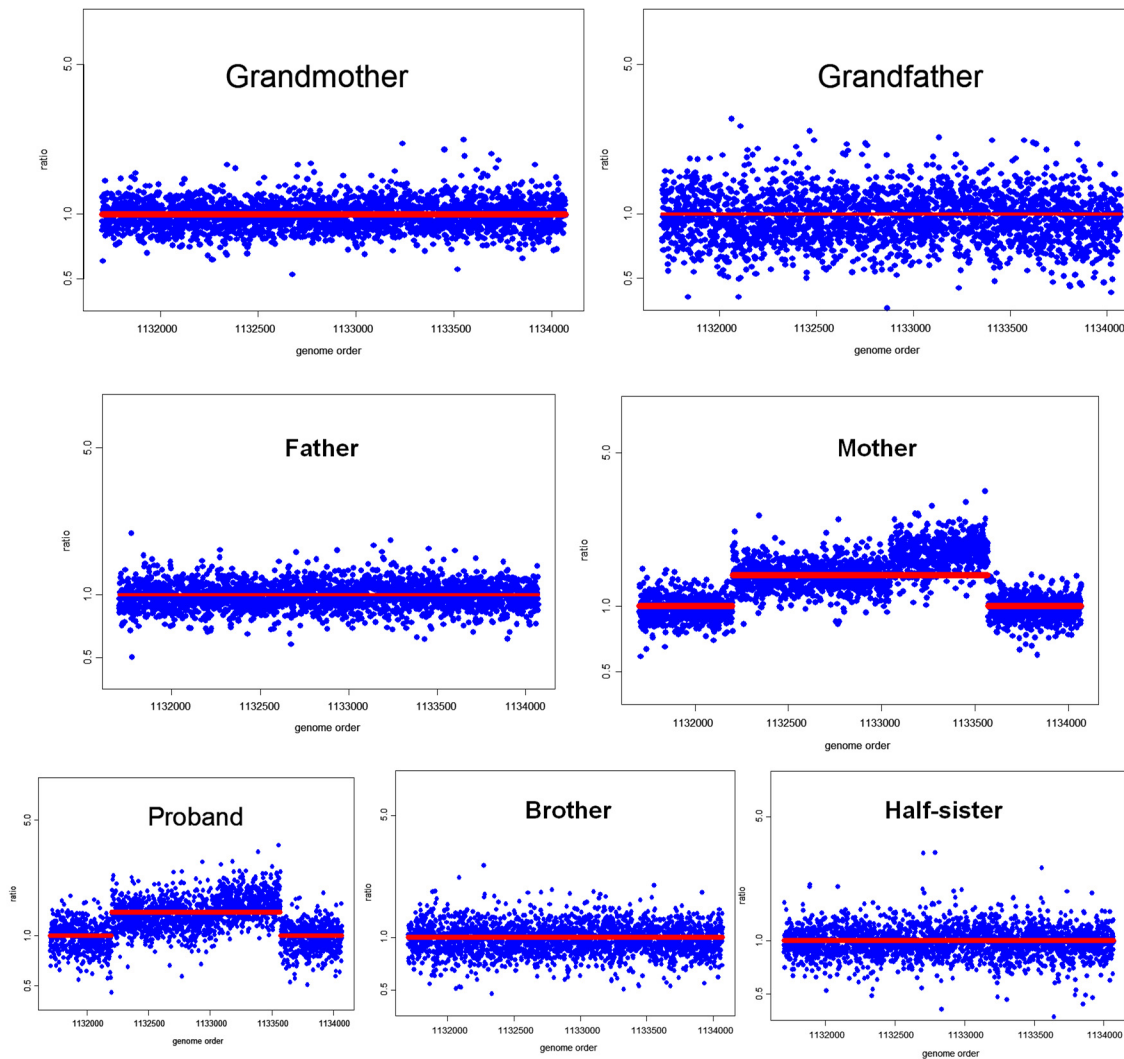

**Figure S2.** Changes in Positive and Negative Syndrome Scale (PANSS) Domains as a Function of Treatment with Glycine or Placebo. Domains salient for subject 5459: conceptual disorganization (A), impulse control (B), positive symptoms (C). Changes in PANSS domains salient for subject 3363: delusions (D), blunted affect (E), positive symptoms (F), and negative symptoms (G). All data are from the acute trials.

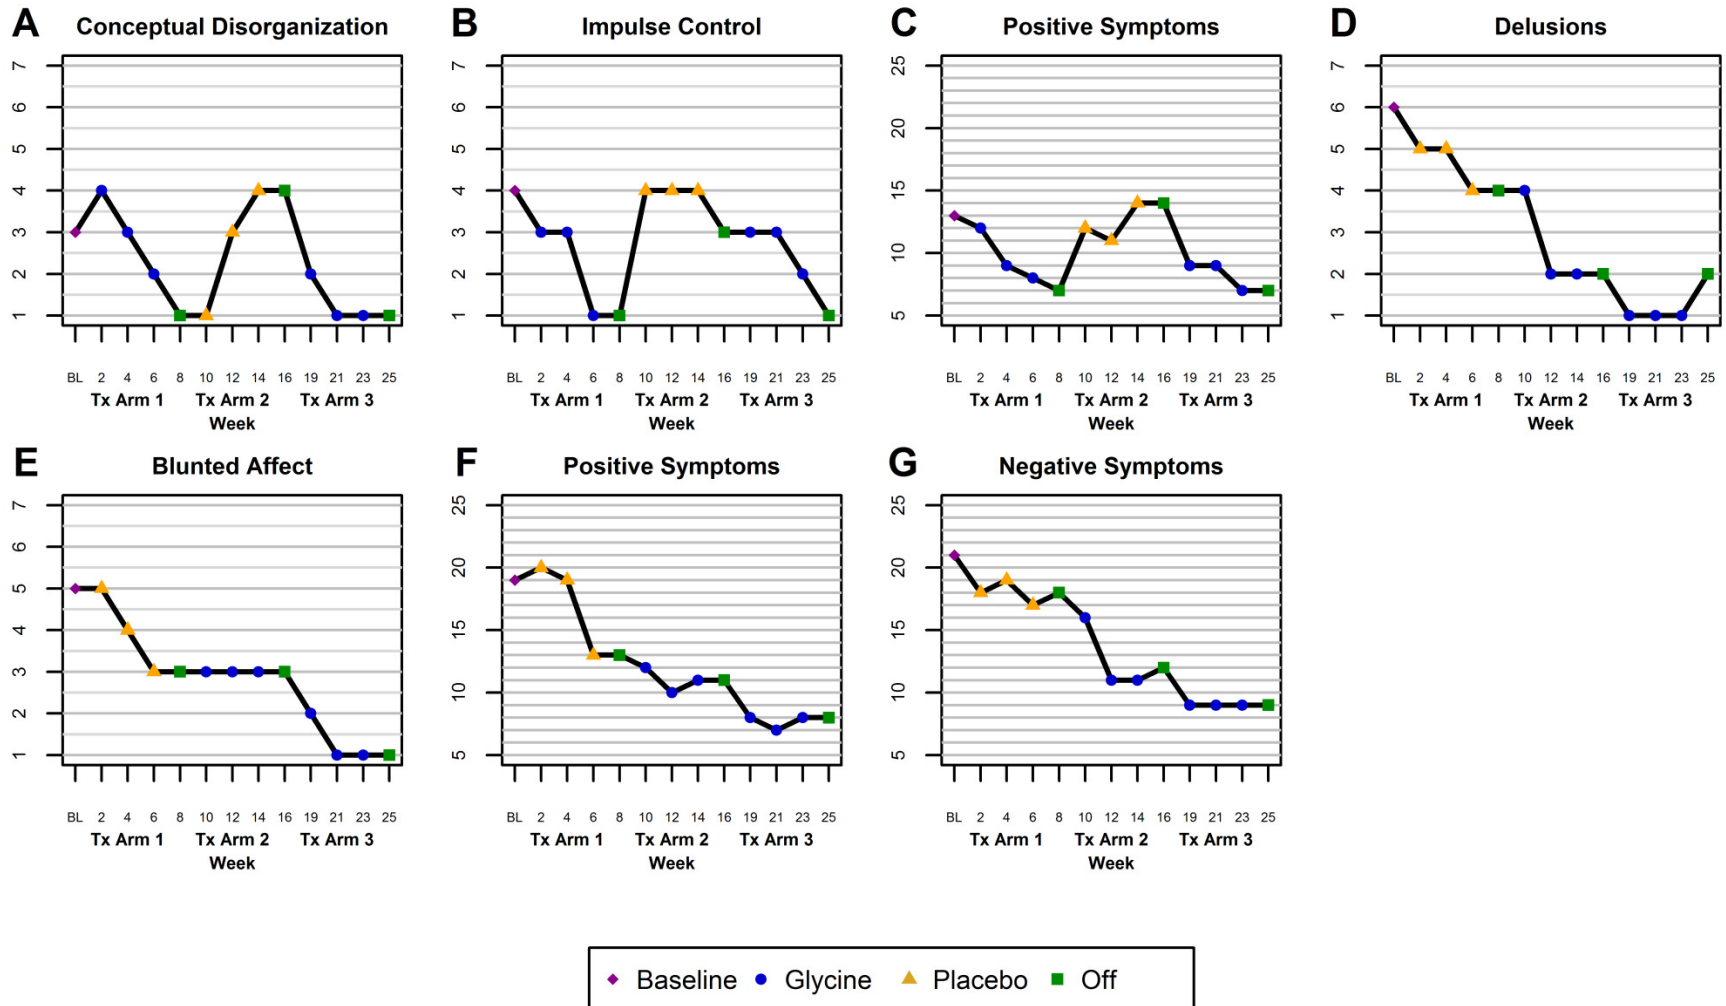

**Figure S3:** Changes in Mania and Depressive Symptoms as a Function of Treatment with Glycine or Placebo in Subject 5459. (A) Changes in mania symptoms (Young Mania Rating Scale). (B) Changes in depressive symptoms (Hamilton Depression Scale).

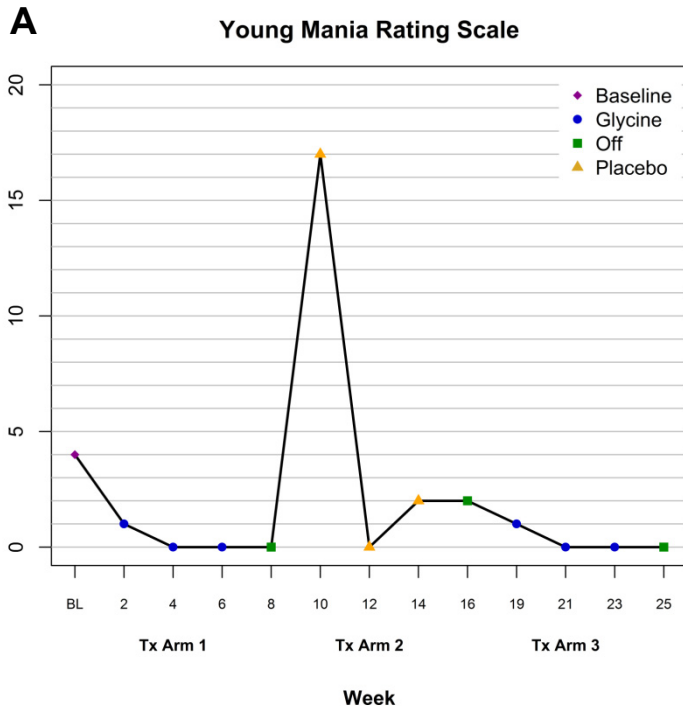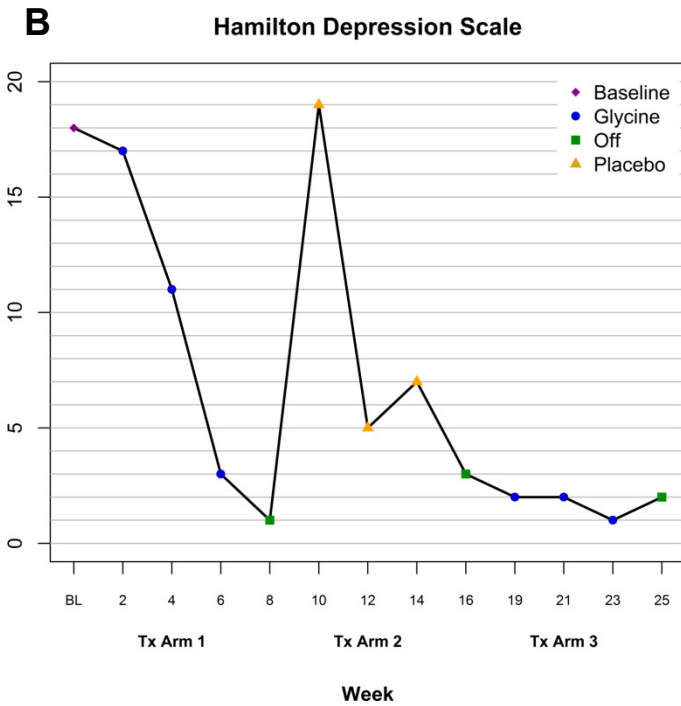

**Figure S4:** Changes in Plasma Kynurenine (KYN) Level as a Function of Treatment with Glycine or Placebo or DCS or Placebo. (A) Glycine or placebo, subject 5459. (B) Glycine or placebo, subject 3363. (C) DCS or placebo, subject 5459. (D) DCS or placebo, subject 3363.

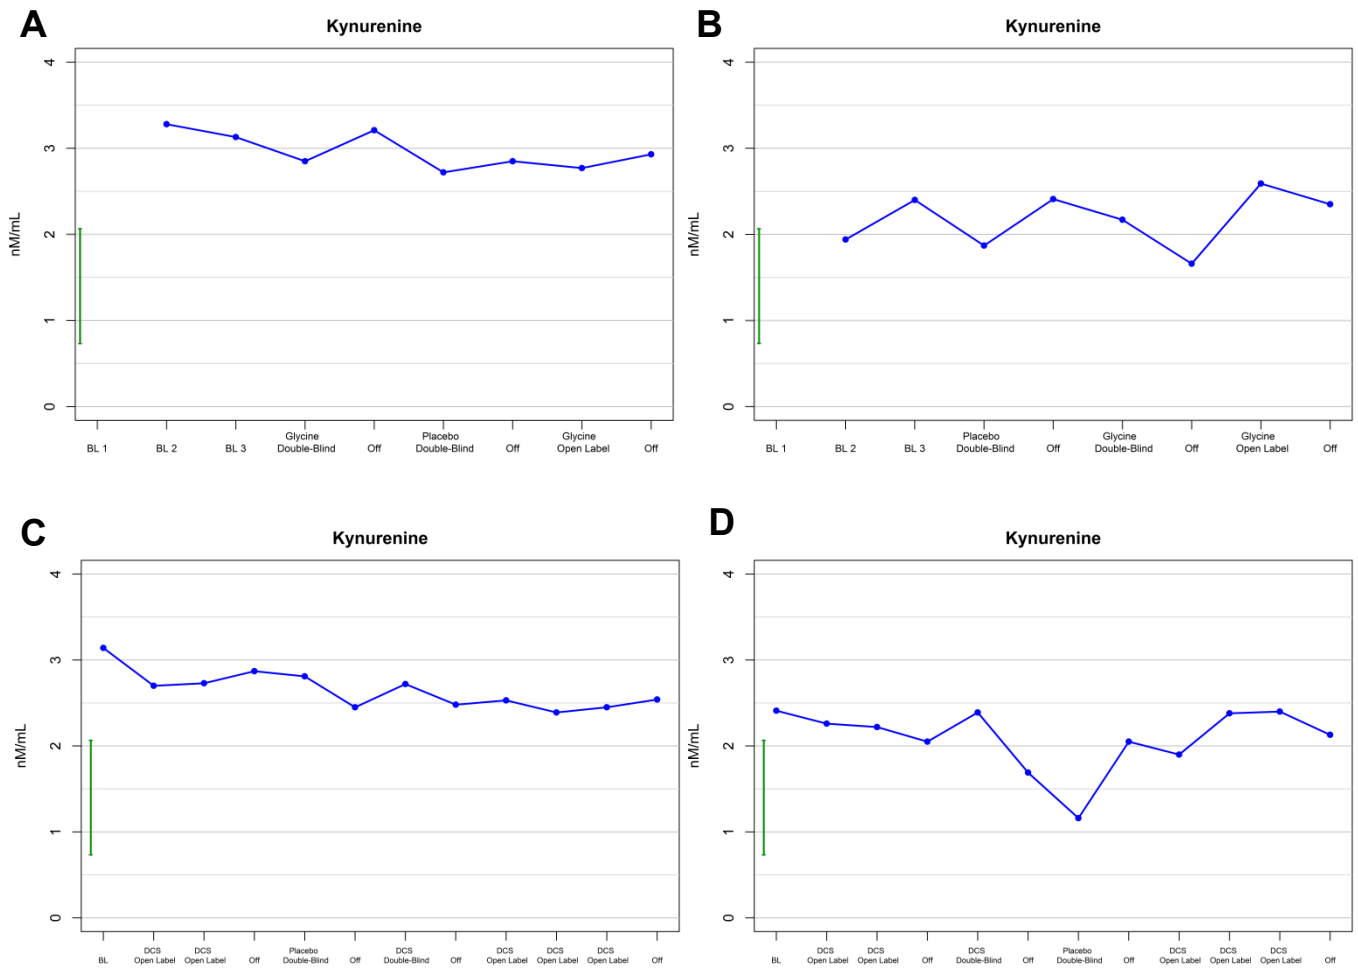

**Figure S5:** Changes in Plasma Kynurenic Acid (KYNA) Level as a Function of Treatment with Glycine or Placebo or DCS or Placebo. (A) Glycine or placebo, subject 5459. (B) Glycine or placebo, subject 3363. (C) DCS or placebo, subject 5459 (D) DCS or placebo, subject 3363.

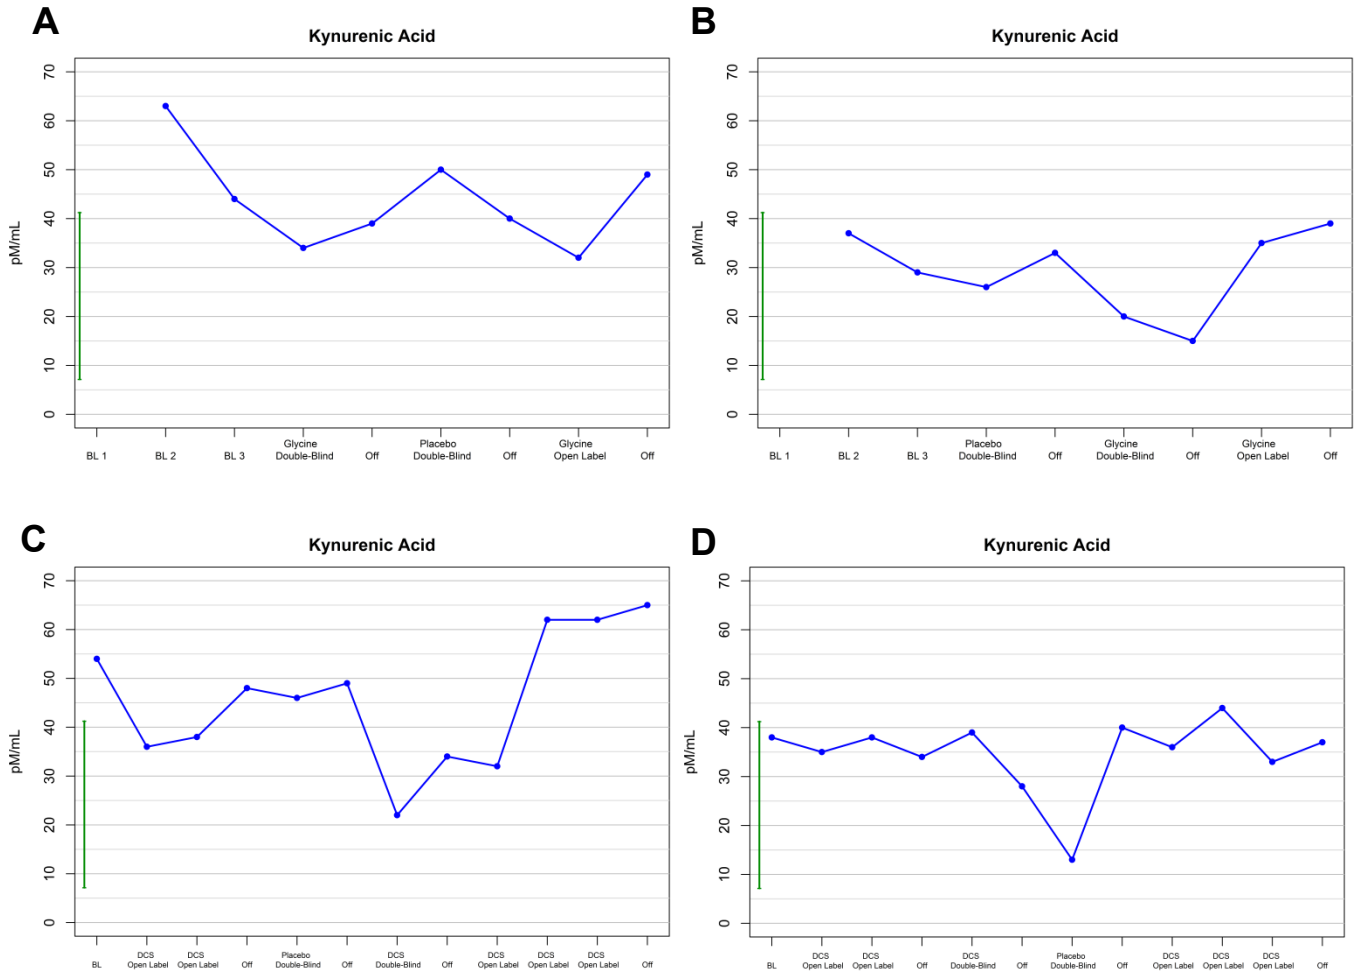

**Figure S6:** Changes in Plasma Glycine Level as a Function of Treatment with DCS or Placebo.  
 (A) Subject 5459. (B) Subject 3363.

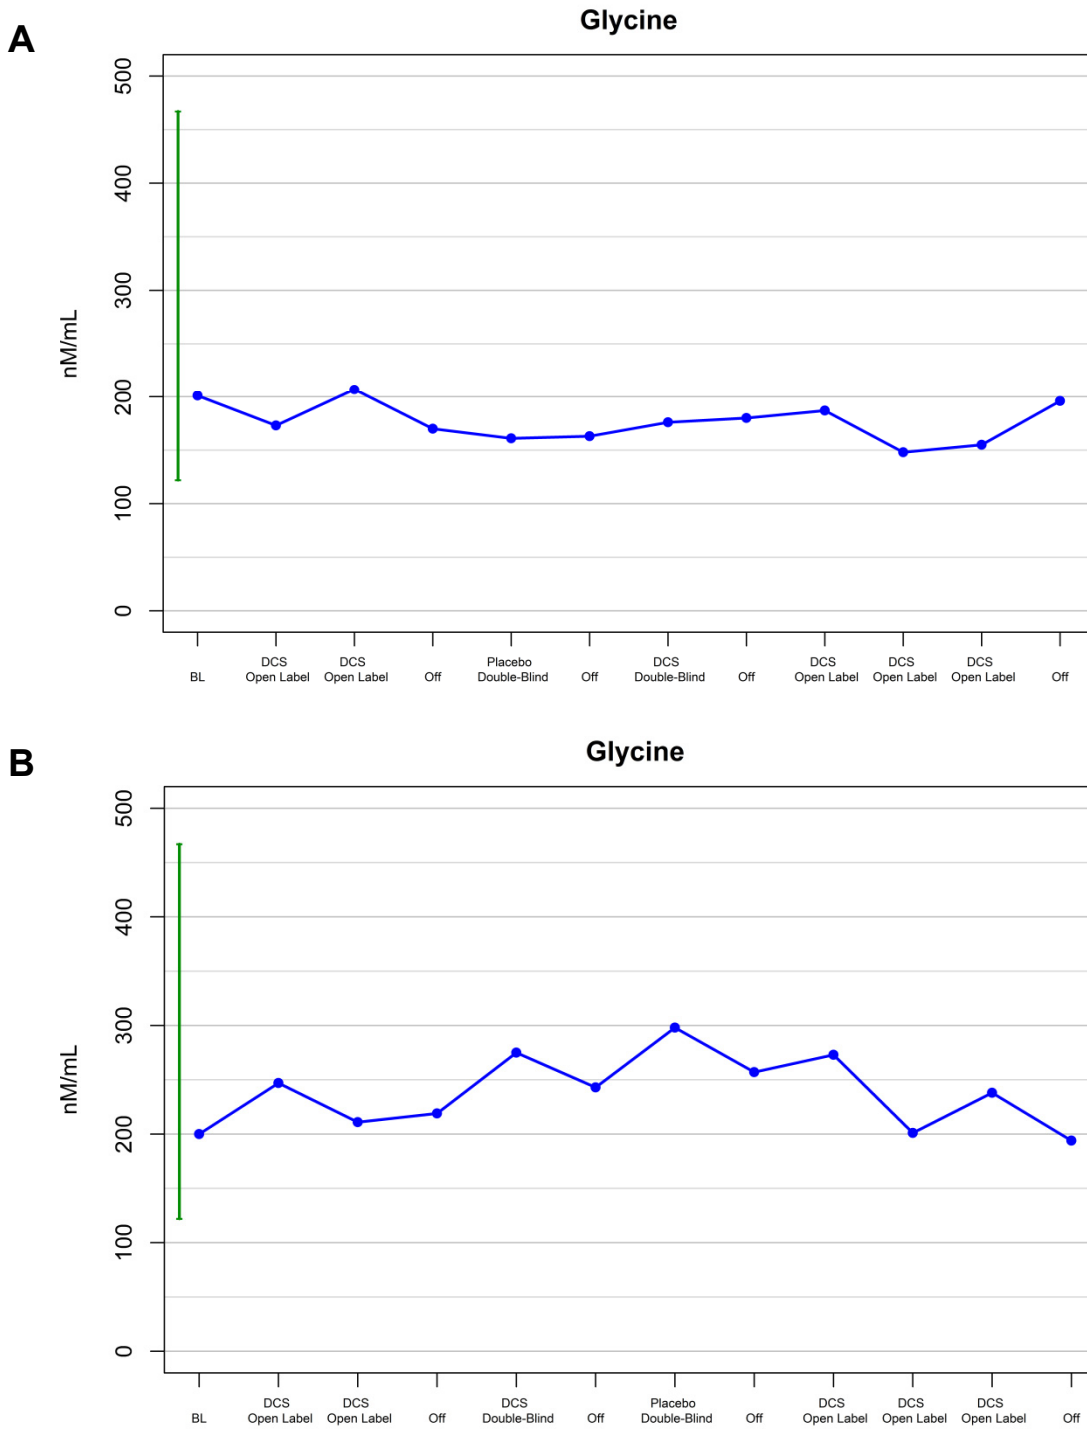

**Figure S7:** Changes in MATRICS Cognitive Domains and Overall Composite Score as a Function of Glycine, DCS and Placebo. (A) Subject 5459. (B) Subject 3363.

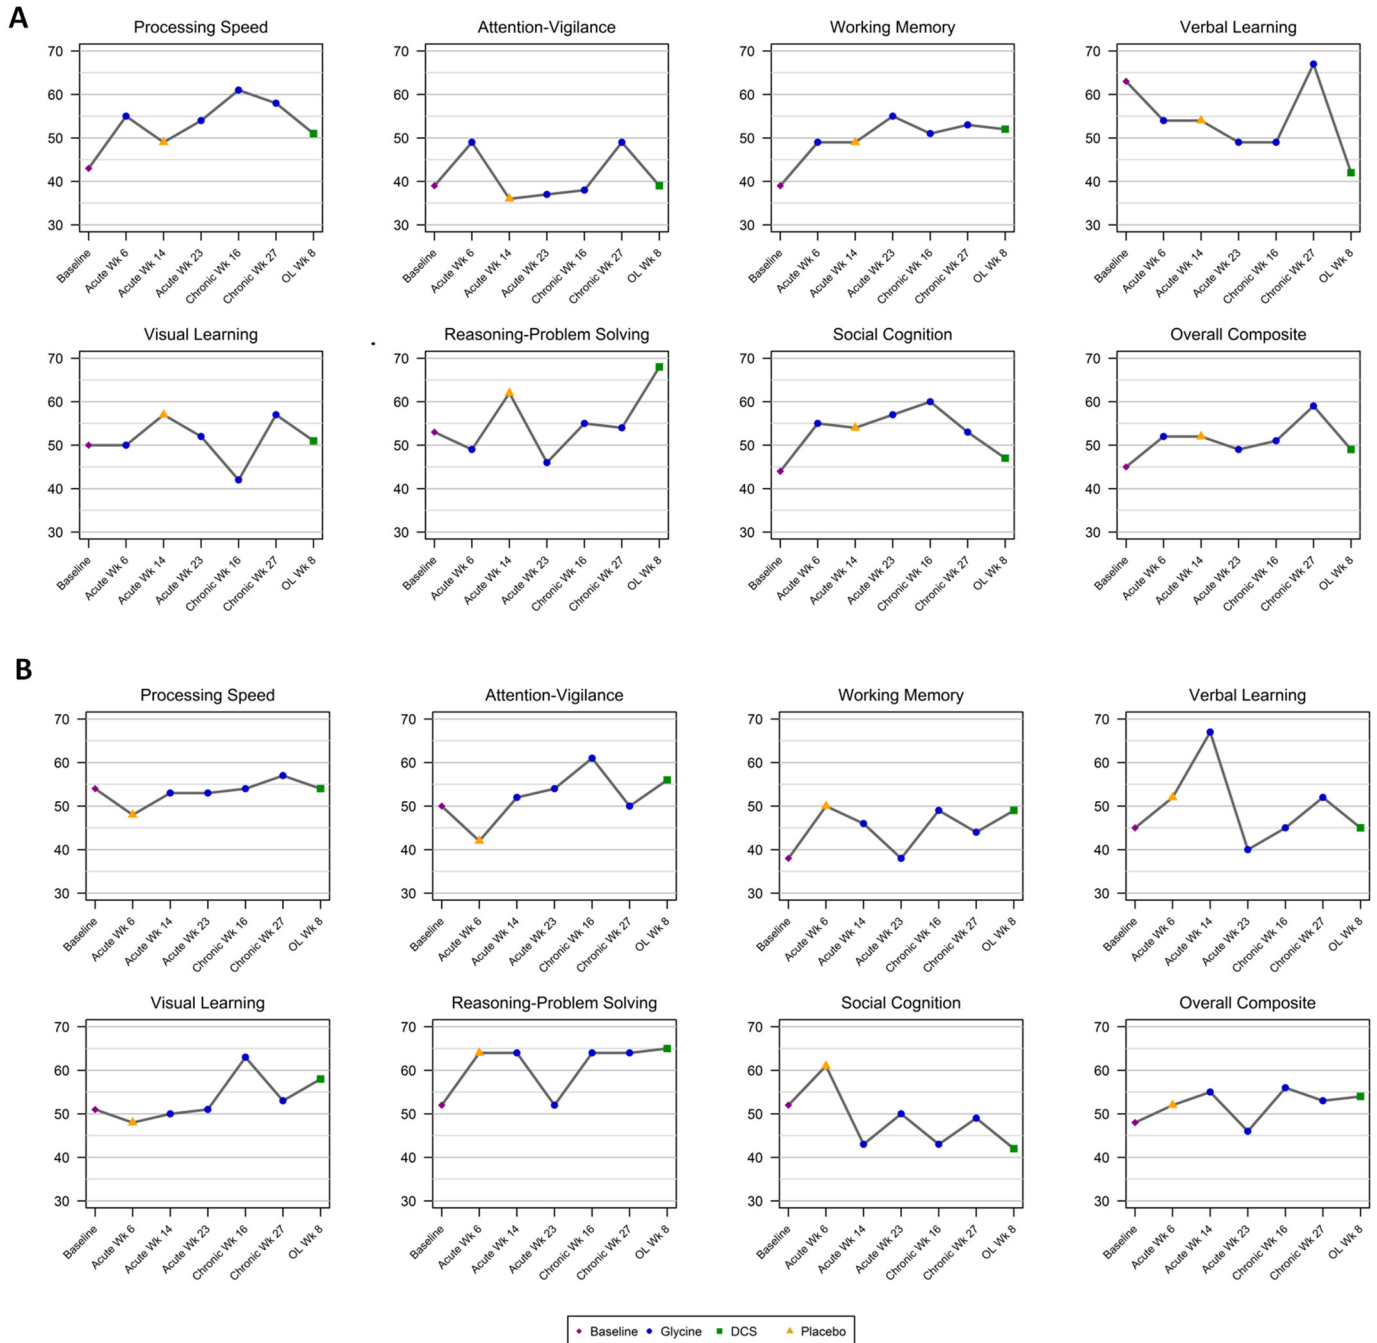



**Figure S8.** Schematic Illustrating Possible Mechanism of Action of Glycine and DCS Augmentation. Glutamate signaling through NMDA receptors requires glycine or D-serine at the glycine modulatory site (GMS). Kynurenic acid (KYNA) competitively blocks the GMS, while excess glycine decarboxylase (GLDC) depletes both glycine and d-serine. D-cycloserine can out-compete KYNA to restore NMDA receptor function and augment treatment [Modified from (68)].

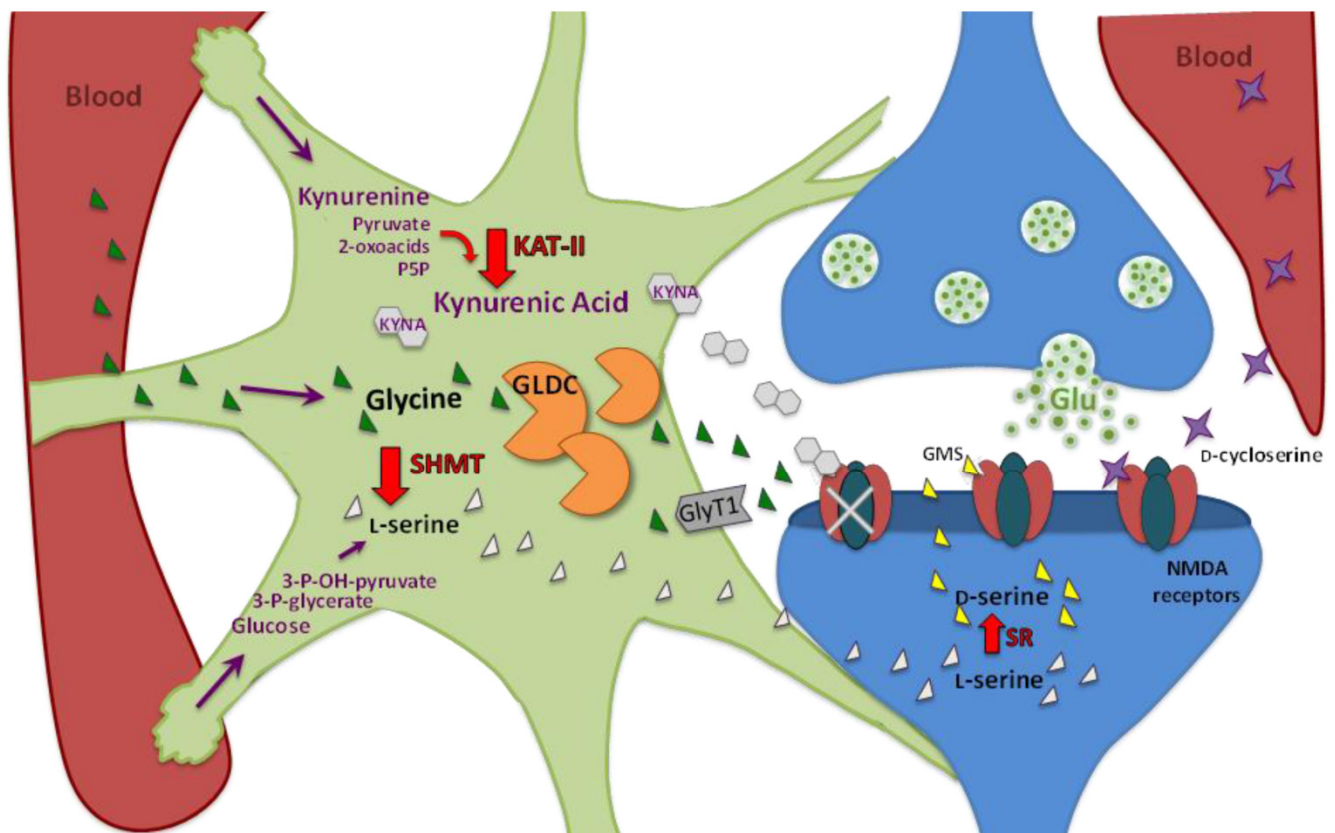

**Figure S9:** GLDC SNP Dosage. Genotypes of SNP rs10975641 of the *GLDC* Gene. (A) Based on family structure, only the G allele could carry the CNV. Individual genotypes noted in figure. Proband's maternal grandfather not genotyped due to lack of biological material. Twenty unrelated individuals were also genotyped. (B) Consistent with the triplication of *GLDC*, quantitative PCR SNP genotyping showed that carriers had equal proportions of each SNP allele, consistent with a genotype of C/CGG, as would be predicted by the triplication. Although the carriers are heterozygous for the SNP, their dosage levels (delta delta CT values) did not differ from those of non-carrier homozygotes for both the C and G allele ( $P > 0.2$ ). Delta delta CT values of the carriers were significantly lower than those of non-carrier heterozygotes for both the C allele ( $P = 2.6 \cdot 10^{-13}$ ) and the G allele ( $P = 8.2 \cdot 10^{-9}$ ). Lower delta-delta CTs correspond to higher allele dosages. The two copy heterozygotes have higher delta-delta CTs, because they have only one of each allele compared with the two copy homozygotes and four copy carriers. In contrast, the carriers and homozygotes are comparable. Courtesy of Scott Hebring.

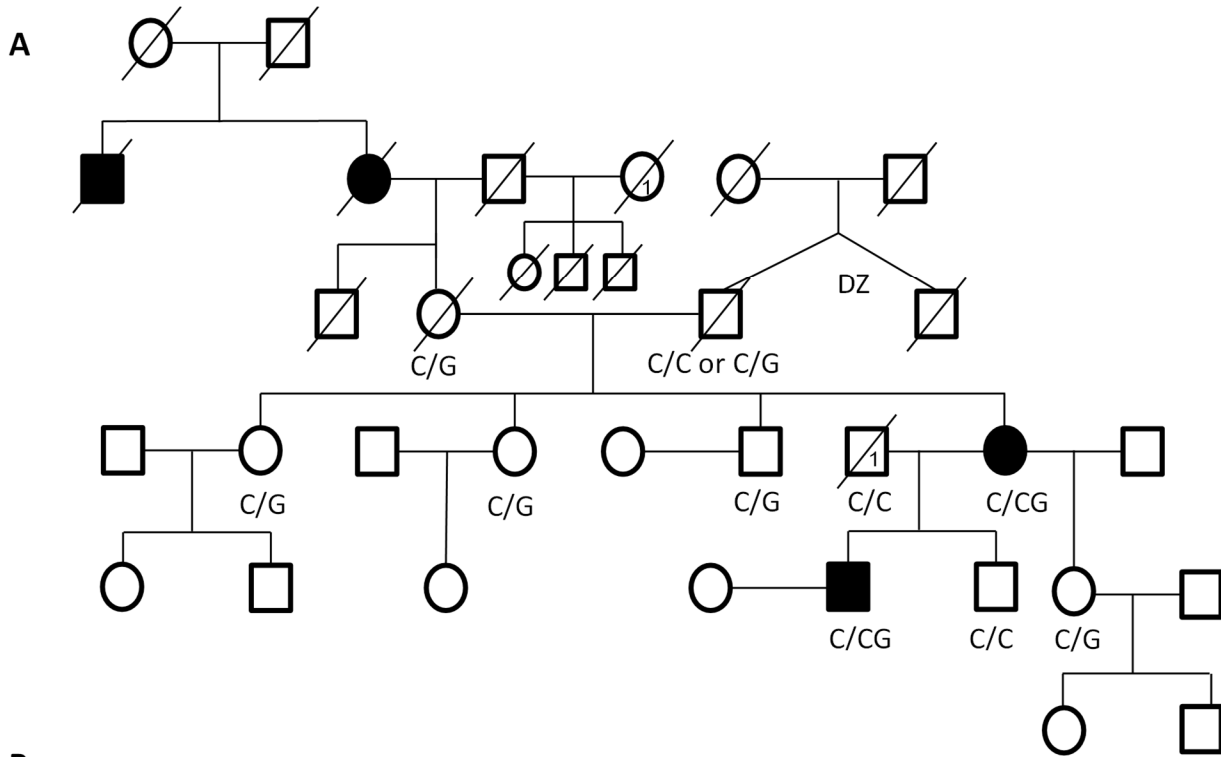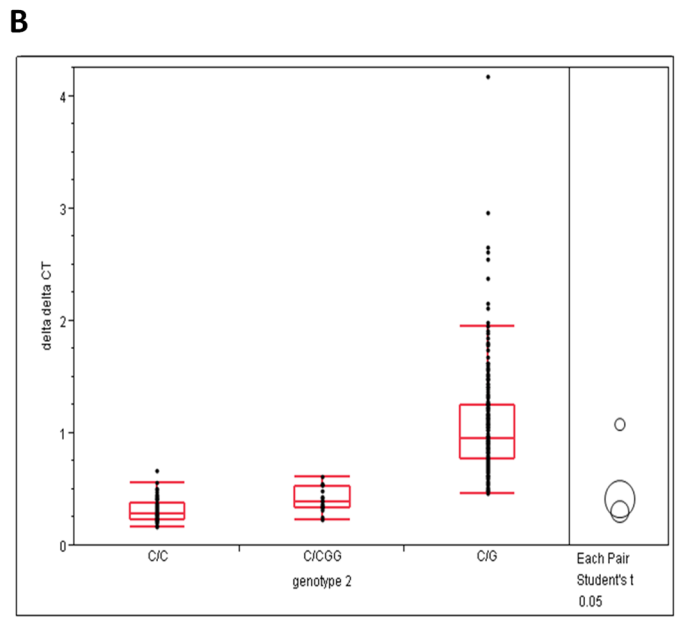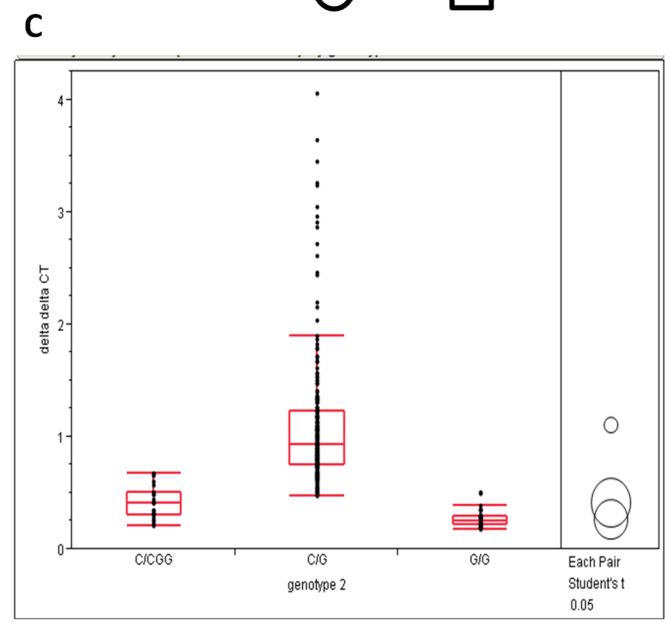

**Figure S10:** Intronic Duplication in *PTPRD*. Courtesy of J Sebat, S McCarthy, and D Malhotra.

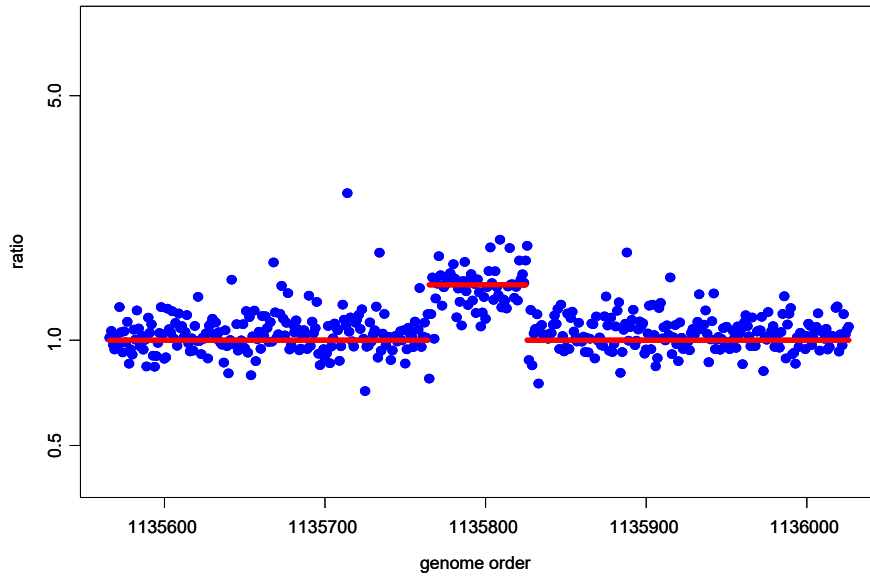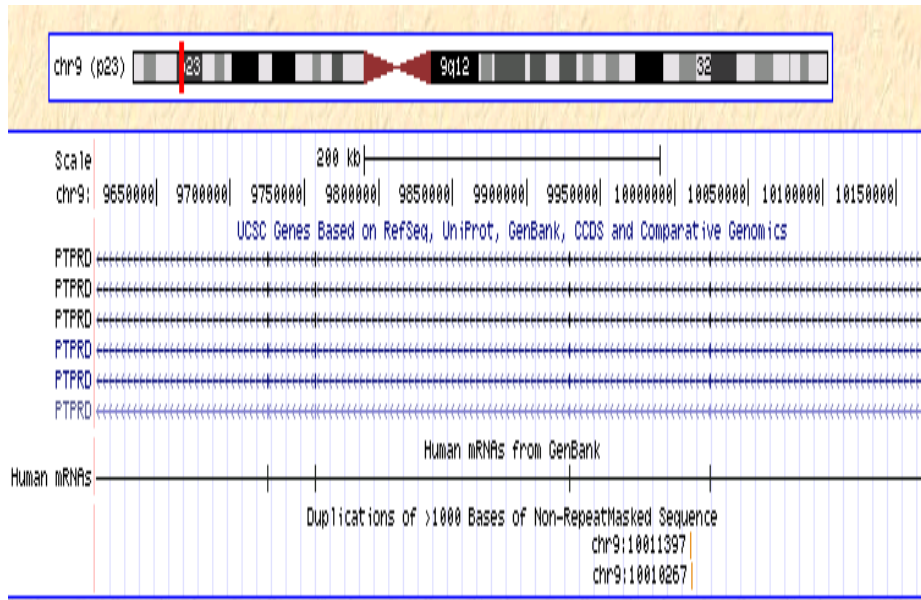

**Figure S11:** Changes in Severity of Illness (Clinical Global Impression Scale, CGI) as a Function of Treatment with Glycine or Placebo. (A) Subject 5459. (B) Subject 3363. 4: Moderately ill; 3 Mildly ill; 2: Borderline ill.

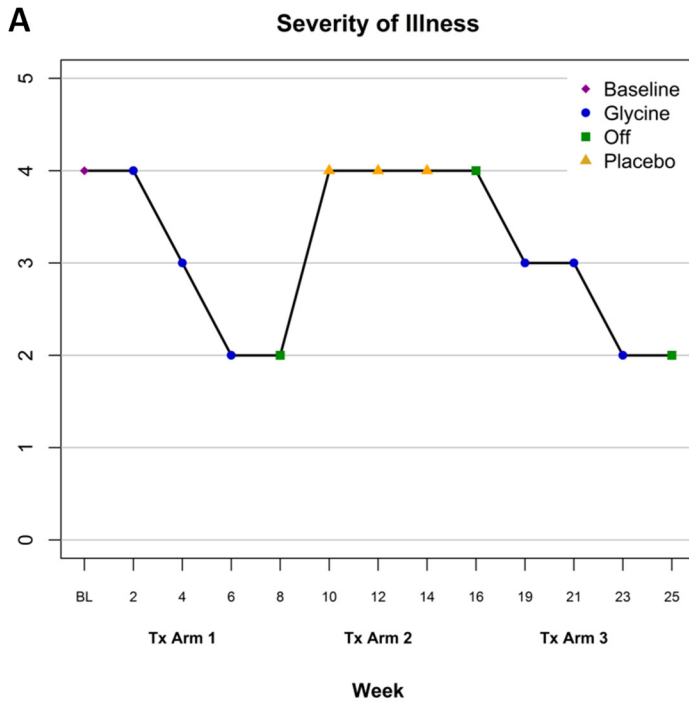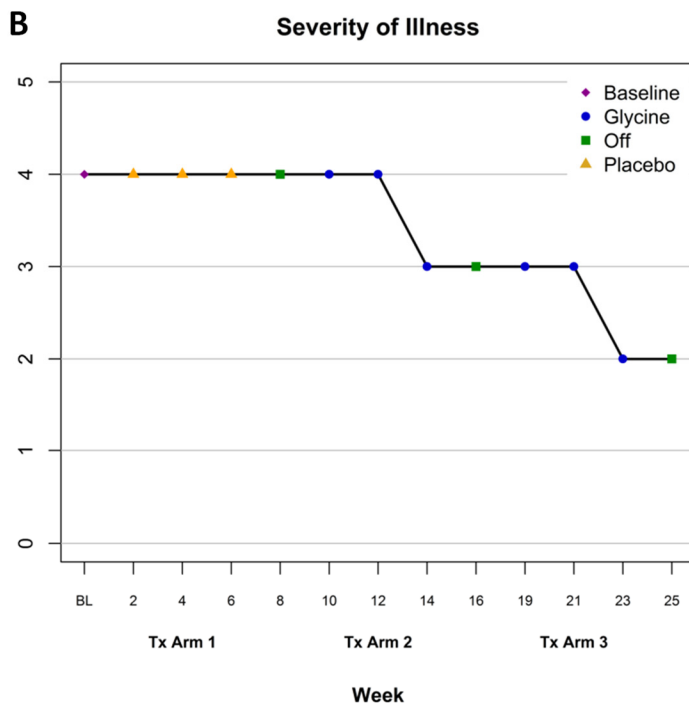

**Figure S12.** Glycine/Placebo Supplies. Labeling on (A) front and (B) back of glycine/placebo bottles during the acute glycine research augmentation trial. (C) Packaging of daily/weekly doses. (D) Blind envelope. (E) Used dosage bottles returned to pharmacy for disposal. (F) Glycine and supplies used in the chronic glycine treatment arm.

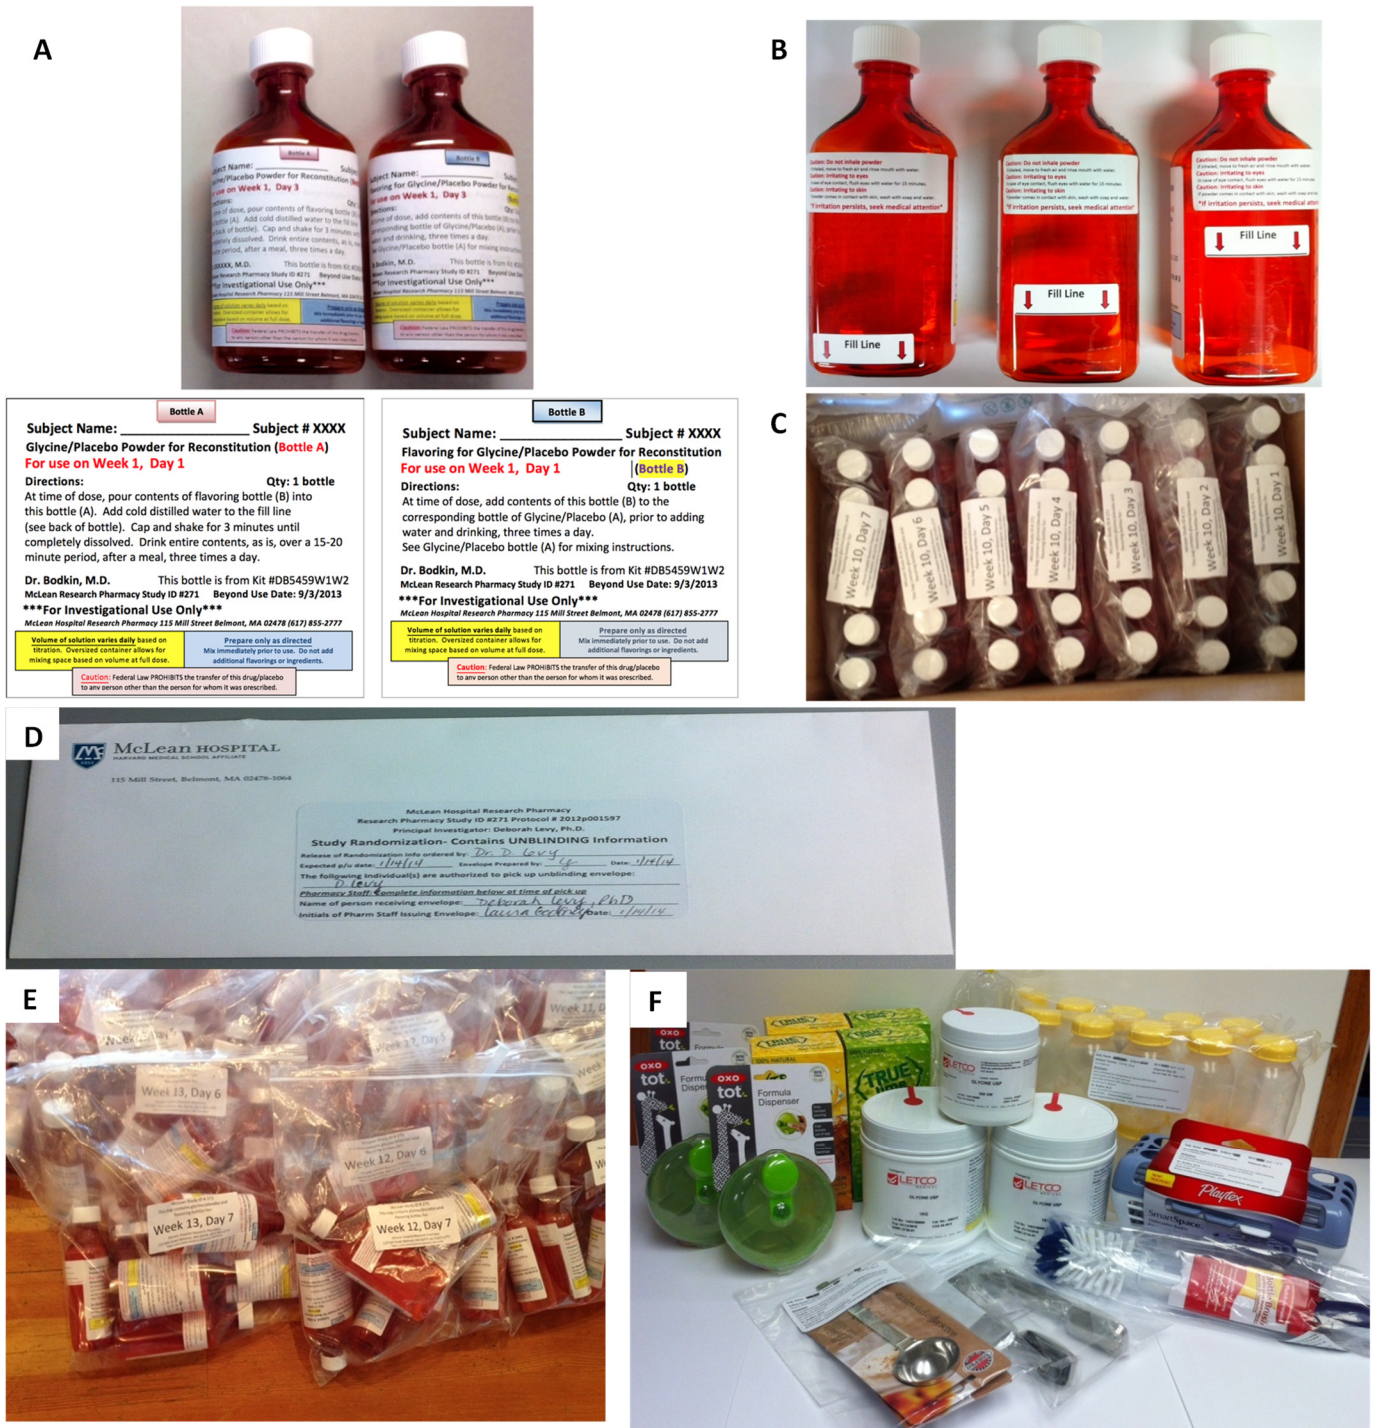



**Figure S13.** Changes in Positive and Negative Syndrome Scale (PANSS) Domains as a Function of Treatment with DCS or Placebo. Domains salient for Subject 5459: conceptual disorganization (A), impulse control (B), positive symptoms (C). Changes in PANSS Domains Salient for Subject 3363: delusions (D), blunted affect (E), positive symptoms (F), and negative symptoms (G). All data are from the acute trials.

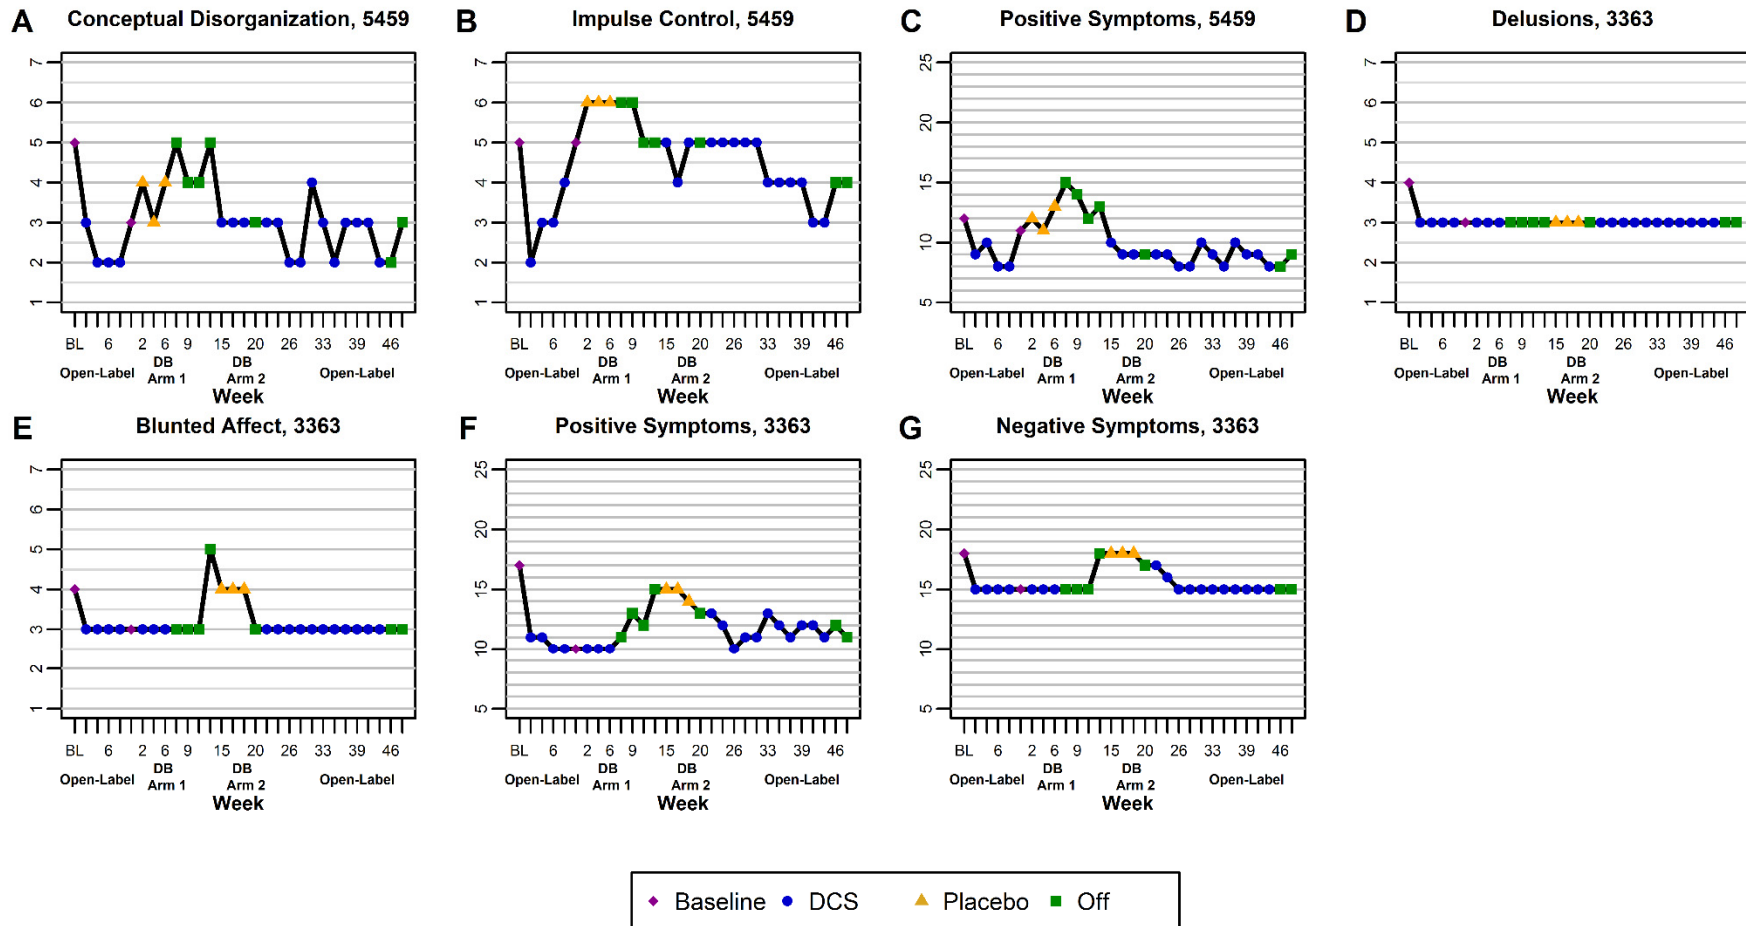

**Figure S14:** Changes in Mania and Depressive Symptoms as a Function of Treatment with DCS or Placebo in Subject 5459. (A) Changes in mania symptoms (Young Mania Rating Scale). (B) Changes in depressive symptoms (Hamilton Depression Scale).

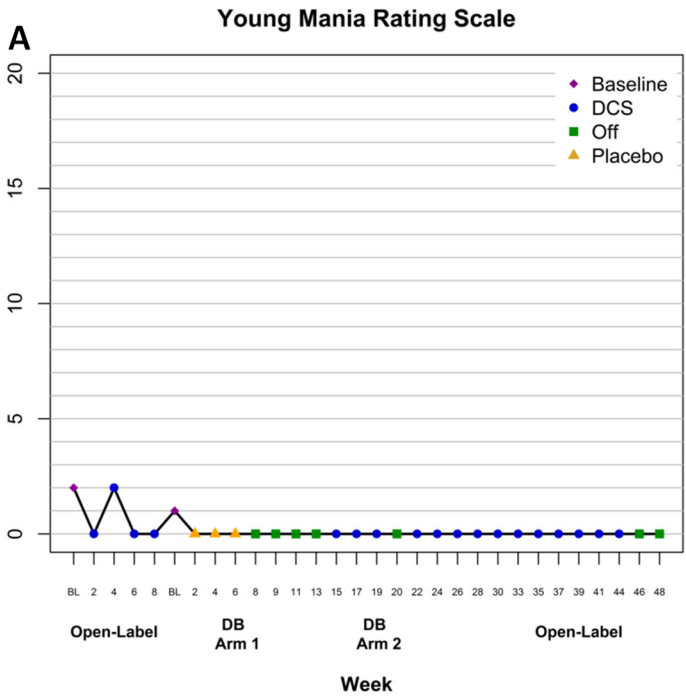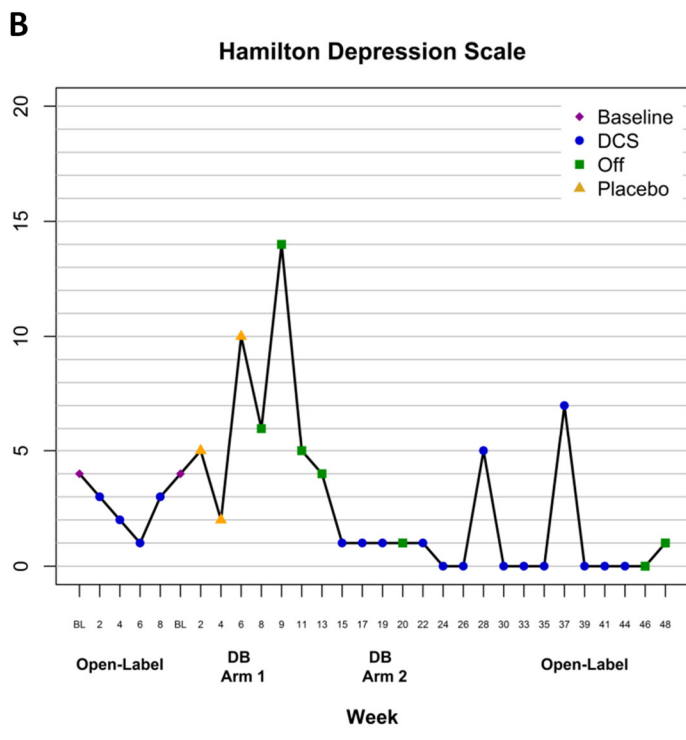



**Figure S15:** Changes in Severity of Illness (CGI) as a Function of Treatment with DCS or Placebo. (A) Subject 5459. (B) Subject 3363. 4: Moderately ill; 3 Mildly ill; 2: Borderline ill.

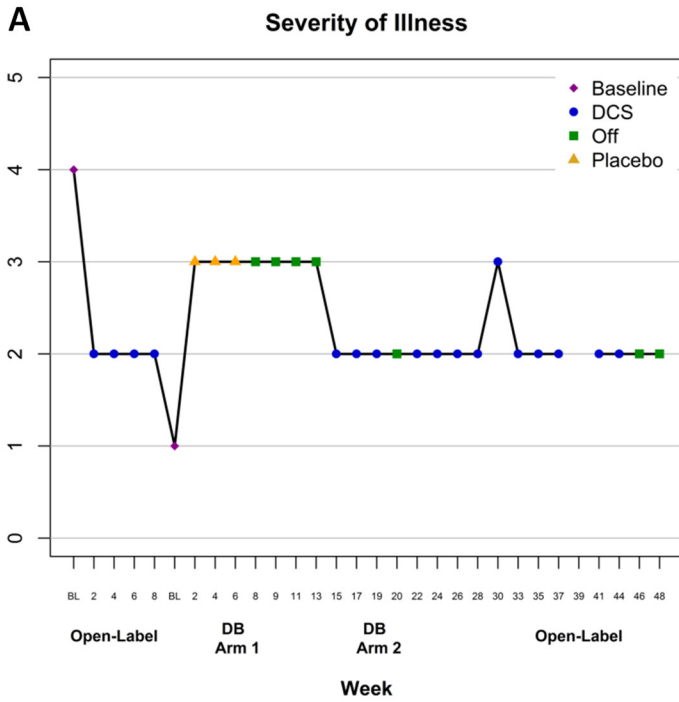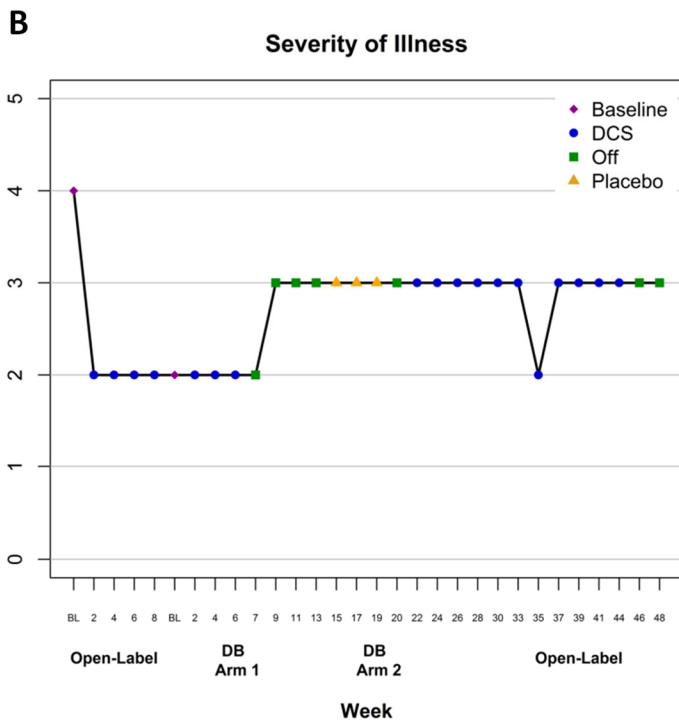

**Figure S16:** Sequencing of a Schizophrenia Patient from the Rujescu Cohort (47) by the Lupski Lab, Baylor College of Medicine. *GLDC* is completely deleted and *KDM4C* is partially deleted. *IL33*, *TD52L3*, and *UHRF2* are also deleted.

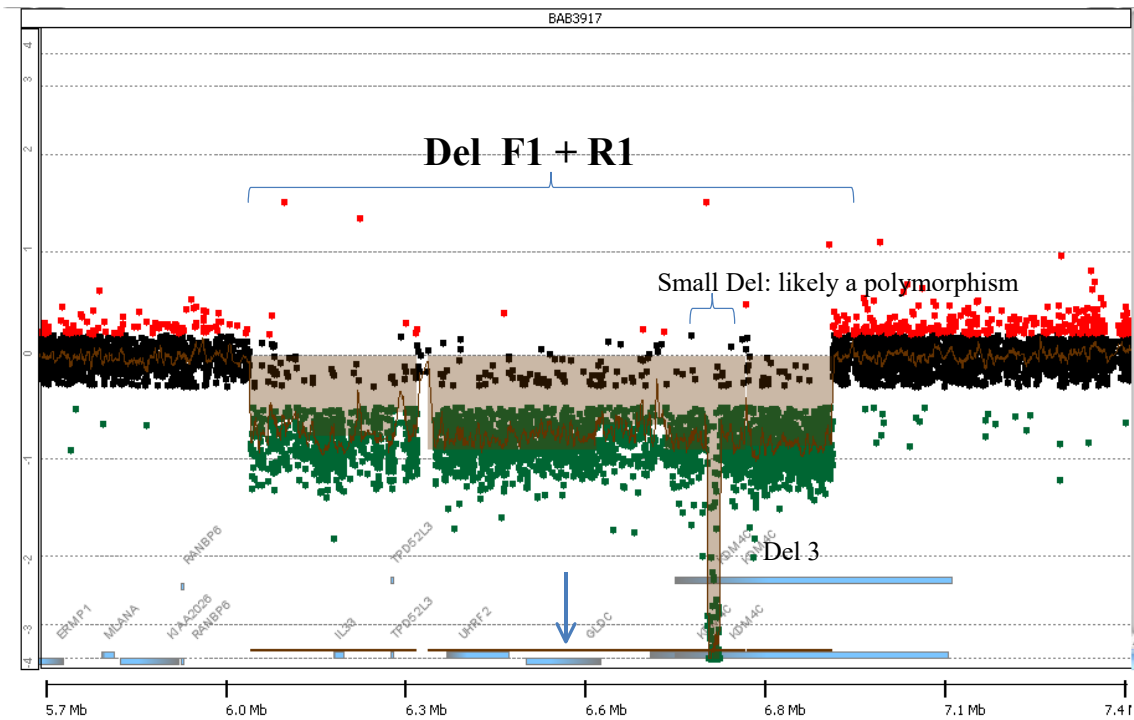

**Figure S17:** Sequencing of Autism Genetic Research Exchange Family AU2372 (61) by the Lupski Lab, Baylor College of Medicine. Two ASD/PPD brothers, one with autism spectrum disorder, one with pervasive developmental disorder, had a paternally inherited partial duplication of *GLDC/KDM4C*.

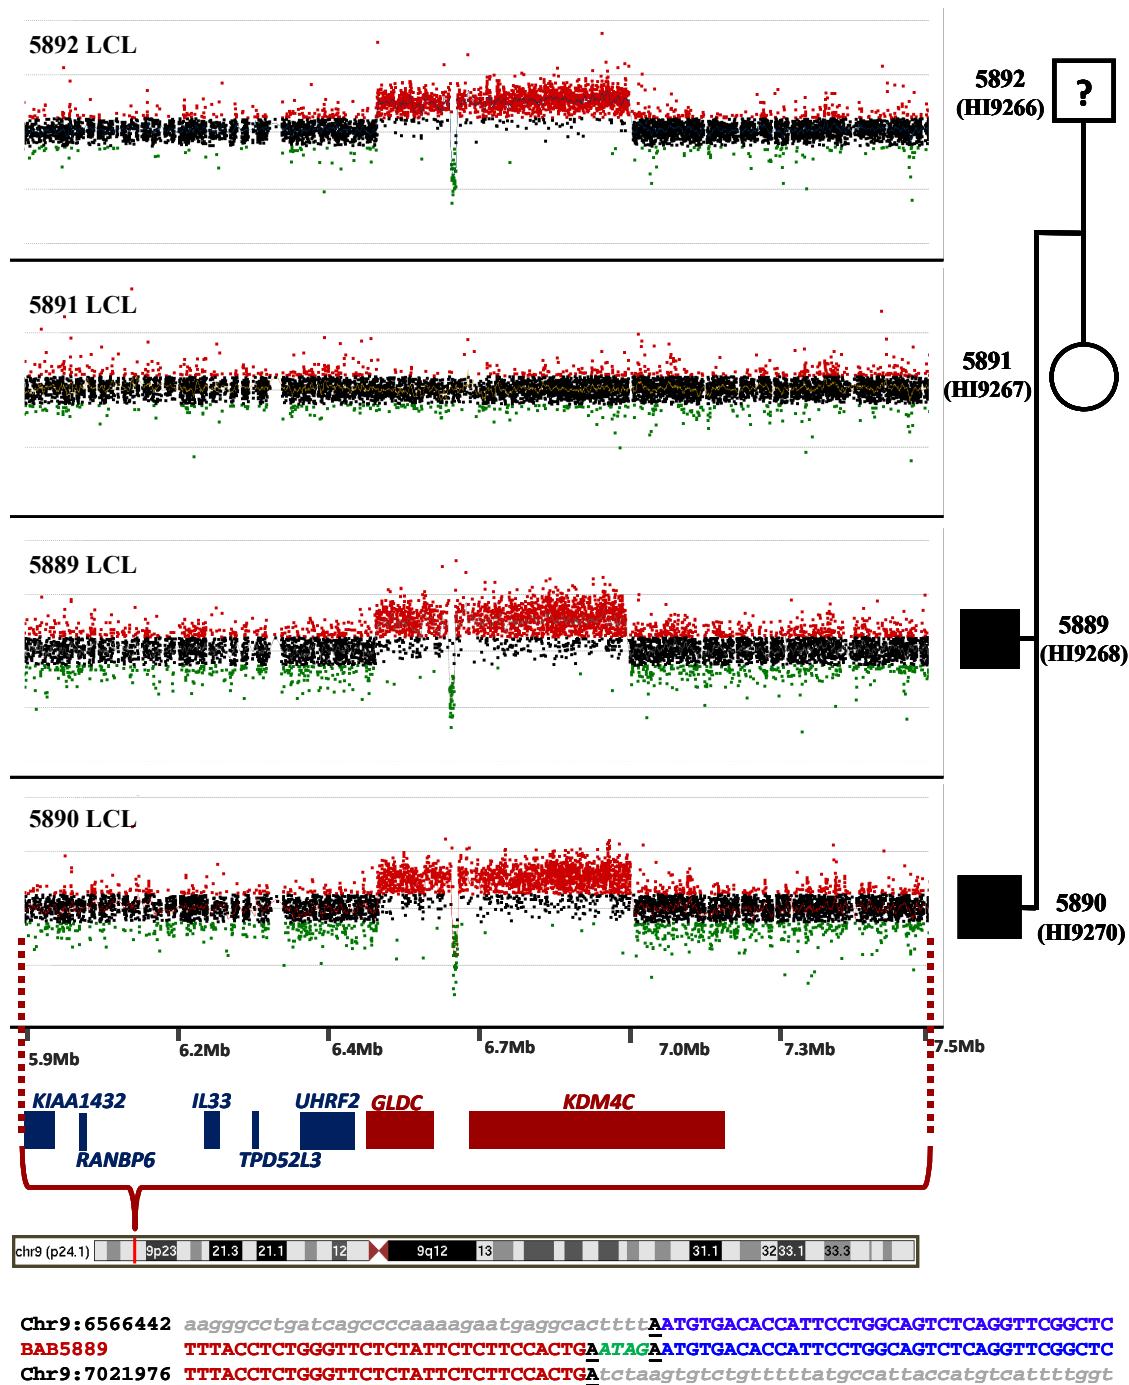

Supplement: NIHMS1528958-supplement-2.pdf [file NIHMS1528958-supplement-2.pdf]
